# Supplementary material
Source: publisher figshare collection journal article supplement (https://acs.figshare.com/ndownloader/files/35255969)
Supplement: Supplementary file 1 [file 35255969]

## Sheet: Content
Supporting Information
IDL-PPBopt: A Strategy for Prediction and Optimization of Human Plasma Protein Binding of Compounds via an Interpretable Deep Learning Method
Chaofeng Lou, Hongbin Yang, Jiye Wang, Mengting Huang, Weihua Li, Guixia Liu, Philip W. Lee, Yun Tang*
*Corresponding author. E-mail: ytang234@ecust.edu.cn.
Tables	Description
S2	All chemical information of SMILES, PPB records and dataset classifications
S6	Information of all ESub-GPSub pairs
S7	Information of all RESub-GPSub pairs

## Sheet: Table S2
cano_smiles	PPB Fractions	set_split
CCN(CC)CC#CCOC(=O)C(O)(c1ccccc1)C1CCCCC1	1	valid
CCC=CCC=CCC=CCC=CC=CC(O)CCCC(=O)O	1	valid
O=C1C(=O)c2ccccc2C(O)=C1C1CCC(c2ccc(Cl)cc2)CC1	1	valid
CC1CC2C3CC(F)C4=CC(=O)C=CC4(C)C3(F)C(O)CC2(C)C1(OC(=O)c1ccco1)C(=O)SCF	1	valid
c1ccc(C(O[C@@H]2CCCN(CCc3ccc4c(c3)OCO4)C2)c2ccccc2)cc1	0.9999	valid
O=c1cc(N2CCOCC2)oc2c(-c3cccc4c3sc3ccccc34)cccc12	0.9996	valid
Cc1ccc(C(=O)N(CCCN)[C@@H](c2nc3cc(Cl)ccc3c(=O)n2Cc2ccccc2)C(C)C)cc1	0.999165	valid
CC(C)(C)OC(=O)NC[C@H]1CC[C@H](CNC(=O)c2cc(-c3ccccc3)nc3ccccc23)CC1	0.999	valid
CC(C)(C)c1cc(-c2cc(-c3ccc(C(=O)O)cc3)ccc2OCCO)ccc1N1CCCC1	0.999	valid
COc1ccc(C(F)(F)F)cc1COc1ccc(CCC(=O)O)cc1C	0.999	valid
CCc1ccc(C(=O)NC(=O)c2ccccc2O)cc1	0.999	valid
CN1CCN(c2ccc(NC(=O)c3cc(N(C)Cc4ccc(C(F)(F)F)cc4)ncn3)cc2)CC1	0.9986	valid
Cc1cccc(C(CC[C@@H](N)C(=O)O)(c2ccccc2)c2ccccc2)c1	0.99832	valid
O=C(Nc1nc2ccccc2s1)NC12CC3CC(CC(C3)C1)C2	0.998	valid
C[C@H](c1ccc(F)cc1)N1C(=O)O[C@](Cc2ccccc2)(c2nc3cc(-c4cccnc4)ccc3[nH]2)C1=O	0.998	valid
FC(F)(F)c1c(OC[C@H]2C[C@@H]2c2ccc(Cl)cc2)ccn2c(CC3CC3)nnc12	0.998	valid
CC(C)(C(=O)Nc1ccc(Cl)c(C(F)(F)F)c1)S(=O)(=O)c1ccc(Cl)cc1	0.998	valid
CC(C)SCC(O/N=C(\C(=O)N[C@@H]1C(=O)N(OS(=O)(=O)O)C1(C)C)c1csc(N)n1)c1cc(=O)c(O)cn1O	0.9979	valid
O=S(=O)(Nc1cc(Cl)ccc1Cn1ccnn1)c1ccc(Cl)c(Cl)c1	0.9975	valid
CCCCN(CCCC)C(=O)Cc1c(-c2ccc(OC)cc2)nn2c(CC)cc(CC)nc12	0.997	valid
Cc1nc(C#Cc2ccnc(Cl)c2)c(C)n1-c1ccc(OC(F)(F)F)cc1	0.997	valid
Cc1ccc(NC(=O)NC2CCCCCC2)cc1Cl	0.997	valid
O=C(O)c1cc(Cc2ccc(-c3cccnc3)cc2)c2ccccn2c1=O	0.997	valid
CC(C)C(O/N=C(\C(=O)N[C@@H]1C(=O)N(OS(=O)(=O)O)C1(C)C)c1csc(N)n1)c1cc(=O)c(O)cn1O	0.9965	valid
N#Cc1ccc(OCCCN2CCC(C(O)(c3ccccc3)C3CCCC3)CC2)cc1	0.996	valid
O=C1Nc2ccc(Cl)cc2[C@@](C#CC2CC2)(C(F)(F)F)O1	0.996	valid
CC(=O)N1CCN(CCOc2ccc(-c3cccc4c(=O)cc(N5CCOCC5)oc34)c3sc4ccccc4c23)CC1	0.9951	valid
Fc1ccc2c(CN3CCC(F)(F)[C@H](CCc4ccccc4F)C3)c[nH]c2c1	0.995	valid
COc1ccc2ncn(-c3cc(O[C@H](C)c4ccccc4C(F)(F)F)c(C(N)=O)s3)c2c1	0.995	valid
Cc1cc(C)c2cc(C(=O)NC3CN(c4ccc(C(F)(F)F)nc4)C3)ccc2n1	0.995	valid
O=C(NC1CCCC1)C1CCN(c2nc3cc(Cl)ccc3o2)CC1	0.995	valid
CC1(C)[C@H](NC(=O)/C(=N\OC(CO)c2cc(=O)c(O)cn2O)c2csc(N)n2)C(=O)N1OS(=O)(=O)O	0.9941	valid
O=C(O)[C@@H]1C[C@@H](C2CCCCC2)CN1C(=O)CP(=O)(O)CCCCc1ccccc1	0.994	valid
O=C(NCc1ccc(S(=O)(=O)c2cccc(C(F)(F)F)c2)cc1)c1cc2cnccc2[nH]1	0.994	valid
Cc1noc2c1-c1sc(C)c(C)c1C(c1ccc(N)nc1)=N[C@H]2CC(N)=O	0.994	valid
C[C@@H]1CN(c2noc(C(F)(F)F)n2)CCN1c1ncc(OCc2ccncc2C#N)cn1	0.993	valid
Clc1ccc(CN2CCO[C@H](COc3ccccc3)C2)cc1	0.993	valid
CCC[C@@H](c1ccc(C(=O)O)c(Oc2cccc(Cl)c2)c1F)N1CCC[C@H](n2cc(C)c(=O)[nH]c2=O)C1	0.993	valid
CCCCCOc1ccc(-c2cc(-c3ccc(C(=O)N[C@H]4C[C@@H](O)[C@@H](O)NC(=O)[C@@H]5[C@@H](O)[C@@H](C)CN5C(=O)[C@H]([C@H](O)CC(N)=O)NC(=O)[C@H]([C@H](O)[C@@H](O)c5ccc(O)c(OS(=O)(=O)O)c5)NC(=O)[C@@H]5C[C@@H](O)CN5C(=O)[C@H]([C@@H](C)O)NC4=O)cc3)no2)cc1	0.992667	valid
O=C(O)c1cn(Cc2ccc(-c3ccccc3)cc2)c2cccc(F)c2c1=O	0.992	valid
CCCSc1nc(N2CCC[C@@H](CC(=O)O)C2)ccc1C(=O)NC1CCCCC1	0.992	valid
O=S(=O)(Nc1ccc(C(F)(F)F)nc1)c1ccccc1C(F)(F)F	0.9916	valid
N#Cc1ccccc1-c1ccc(Cn2cc(C(=O)O)c(=O)c3c(F)cccc32)cc1	0.991	valid
O=C(C1CN(S(=O)(=O)c2cccc3cnccc23)C1)N1CC2CN(c3ccncc3)CC2C1	0.991	valid
CCc1cccc2c3c([nH]c12)C(CC)(CC(=O)O)OCC3	0.9905	valid
CC/C(=C(\c1ccccc1)c1ccc(OCCN(C)C)cc1)c1ccccc1	0.99	valid
CN(CCCN1c2ccccc2CCc2ccccc21)CC(=O)c1ccc(Cl)cc1	0.99	valid
COc1cc(C(=O)NS(=O)(=O)c2ccccc2C)ccc1Cc1cn(C)c2ccc(NC(=O)OC3CCCC3)cc12	0.99	valid
CCN(CC)CC#CCOC(=O)[C@](O)(c1ccccc1)C1CCCCC1	0.99	valid
COc1ccc(CNC(=O)c2cc(C#CC(C)(C)NC(C)=O)cnc2NCc2ccc3c(c2)OCO3)cc1Cl	0.99	valid
C=C1C(=CC=C2CCCC3(C)C2CCC3C(C)CCCC(C)(C)O)CC(O)CC1O	0.99	valid
CCOc1nc2cccc(C(=O)OCc3oc(=O)oc3C)c2n1Cc1ccc(-c2ccccc2-c2noc(O)n2)cc1	0.99	valid
C[C@]12CC[C@H]3[C@@H](CC=C4C[C@@H](O)CC[C@@]43C)[C@@H]1CC=C2c1cccnc1	0.99	valid
CC1=NN(c2ccc(C)c(C)c2)C(=O)/C1=N\Nc1cccc(-c2cccc(C(=O)O)c2)c1O	0.99	valid
COc1ccc2c(C(=O)c3ccc(Cl)cc3)c(C)n(CC(=O)O)c2c1	0.99	valid
Cc1ccccc1C(=O)Nc1ccc(C(=O)N2CCC[C@@H](O)c3cc(Cl)ccc32)c(C)c1	0.99	valid
Cc1ccc([C@@H]2O[C@H](CO)[C@@H](O)[C@H](O)[C@H]2O)cc1Cc1ccc(-c2ccc(F)cc2)s1	0.99	valid
COc1cc(CN2CCO[C@H](COc3ccccc3)C2)ccc1Cl	0.99	valid
O=C(O)c1ccc2nc(-c3cc(Cl)cc(Cl)c3)oc2c1	0.99	valid
CC(C)C(=O)OCC(=O)[C@@]12O[C@H](C3CCCCC3)O[C@@H]1C[C@H]1[C@@H]3CCC4=CC(=O)C=C[C@]4(C)[C@H]3[C@@H](O)C[C@@]12C	0.99	valid
Cc1cccc(N2CNC(=O)C23CCN(C[C@H](C)NC(=O)c2ccc(Br)cc2)CC3)c1	0.99	valid
C[C@H](CO)Nc1cc(NS(=O)(=O)N2CCC2)nc(SCc2cccc(F)c2F)n1	0.99	valid
Cn1cc2c(-c3cc(F)c(CN4CCc5ncccc5C4=O)c(F)c3)cccc2n1	0.99	valid
CCOC(O)=C1C(C)=NC(C)=C(C(=O)OC)C1c1cccc([N+](=O)[O-])c1	0.99	valid
COc1c(Cl)ccc(Cl)c1C(=O)O	0.99	valid
Cc1cccc(C)c1NC(=O)c1cc(S(N)(=O)=O)c(Cl)cc1O	0.99	valid
COc1ccc2cc(CC(=O)O)ccc2c1	0.99	valid
C#CC1(O)CCC2C3CCc4cc(OS(=O)(=O)O)ccc4C3CCC21C	0.9895	valid
O=C(NCc1ccc(S(=O)(=O)c2ccc(N3CCOCC3)nc2)cc1)c1cc2cnccc2[nH]1	0.989	valid
Cc1nc2sc(C(=O)NC3CC3)c(N)c2c(C)c1Cl	0.989	valid
O=C(O)c1cn(Cc2ccc(-c3ccccc3)cc2F)c2ccccc2c1=O	0.988	valid
CS(=O)(=O)c1nc2cc(Cl)c(Oc3cccc(Cl)c3Cl)cc2[nH]1	0.988	valid
CSc1cccc(C2(C#N)CCN(Cc3cc(C(=O)O)c(=O)n4ccccc34)CC2)n1	0.988	valid
Cc1cn(-c2ccc(-c3cn([C@H]4CCc5c(F)cccc5N(CC(F)(F)F)C4=O)nn3)c(F)c2)cn1	0.987	valid
CCS(=O)(=O)c1ccc(C(NC(C)=O)C(=O)Nc2cc(-c3cc(C#N)cc(F)c3OC)cs2)cc1	0.987	valid
C[C@@H](NC(=O)[C@H]1CCCN1)c1ccc(Nc2ncc3cc(-c4ccncc4)ccc3n2)cc1	0.986	valid
C[C@H](CO)Nc1cc(NS(=O)(=O)N2CCCCC2)nc(SCc2cccc(F)c2F)n1	0.986	valid
CNc1ccc(C=Cc2ccc(OCCOCCOCCF)cc2)cc1	0.985	valid
O=C(c1ccc(F)c(F)c1)N1CCN2C(=O)c3ccccc3C12c1ccc(Cl)cc1	0.985	valid
CN(C)c1cc(-c2ccc(Cn3cc(C(=O)O)c(=O)c4cccc(F)c43)cc2)ccn1	0.985	valid
CCc1cc(C(SC[C@H](N)C(=O)O)(c2ccccc2)c2ccccc2)ccc1C	0.984	valid
COc1cc(C(=O)Nc2ccc(NC(=O)c3ccccn3)cc2)cc(-c2nc(=O)o[nH]2)c1	0.984	valid
Nc1ccc(-c2cnc3[nH]cc(-c4ccc5[nH]ccc5c4)c3c2)cn1	0.984	valid
Fc1ccc(Nc2n[nH]c3cccnc23)cc1Cl	0.983	valid
Cc1ccc(-c2c(C)nn(C)c2C)cc1NC(=O)c1ccc(OCc2ccccn2)cc1	0.982	valid
COc1ccc(CN2CCN(c3c(NS(=O)(=O)c4c(C)noc4C)c(=O)c3=O)CC2)cc1	0.982	valid
C[C@H](CO)Nc1cc(NS(=O)(=O)c2cn(C)cn2)nc(SCc2cccc(Cl)c2F)n1	0.981	valid
C#Cc1cnc2nc(O)n(C(CC)CC)c2n1	0.981	valid
C[C@@H](NC1=CC(=O)CC1)c1ccc(Nc2ncc3cc(-c4ccncc4)ccc3n2)cc1	0.98	valid
COc1ccccc1Oc1c(NS(=O)(=O)c2ccc(C(C)(C)C)cc2)nc(-c2ncccn2)nc1OCCO	0.98	valid
CSc1ccc2c(c1)N(CCC1CCCCN1C)c1ccccc1S2	0.98	valid
CC(C)c1c(C(=O)Nc2ccccc2)c(-c2ccccc2)c(-c2ccc(F)cc2)n1CC[C@@H](O)C[C@@H](O)CC(=O)O	0.98	valid
CC(=O)C[C@@H](c1ccccc1)c1c(O)oc2ccccc2c1=O	0.98	valid
Cn1cnc(S(=O)(=O)N2C[C@H]3[C@@H](C2)[C@]3(CNC(=O)c2cc(Cl)cc(Cl)c2)CC2CC2)c1	0.98	valid
Cc1ccccc1C(=O)Nc1ccc(C(=O)N2CCCC(O)c3cc(Cl)ccc32)c(C)c1	0.98	valid
COC(=O)C(c1ccccc1Cl)N1CCc2sccc2C1	0.98	valid
O=C[C@H](C[C@@H]1CCNC1=O)NC(=O)[C@H](CC1CCCCC1)NC(=O)OCc1cccc(Cl)c1	0.98	valid
COC(=O)c1ccc(-c2cc(Cl)c(O[C@H]3O[C@H](CO)[C@@H](O)[C@H](O)[C@@H]3O)c(Cl)c2)cc1	0.98	valid
NC(Cc1cc(I)c(Oc2ccc(O)c(I)c2)c(I)c1)C(=O)O	0.98	valid
COc1cc(N)c(Cl)cc1C(=O)N[C@H]1CCN(CCCOc2ccc(F)cc2)C[C@@H]1OC	0.98	valid
CC(C)(C(=O)NCC(F)(F)C(F)(F)F)C(=O)NC1C(=O)Nc2ccccc2-c2ccccc21	0.98	valid
O=C(O)C=C1CN([C@@H](C(=O)C2CC2)c2ccccc2F)CC[C@H]1S	0.98	valid
CC(=O)SC1CC2=CC(=O)CCC2(C)C2CCC3C(CCC34CCC(=O)O4)C12	0.98	valid
O=c1cc(COc2cc(Cl)cc(Cl)c2)[nH][nH]1	0.98	valid
C[C@@H](Oc1cc(-n2cnc3ccc(OCC4CCN(C)CC4)cc32)sc1C(N)=O)c1ccccc1Cl	0.979	valid
C[C@@](C(=O)O[C@H]1C[N+]2(Cc3noc(-c4ccccc4)n3)CCC1CC2)(c1cccs1)N1CCCCC1	0.978	valid
C[C@@H](Oc1cc2onc(CCC(=O)O)c2cc1Cl)c1ccccn1	0.978	valid
OCCNc1nonc1/C(=N/O)Nc1ccc(F)c(Br)c1	0.977	valid
COC1/C=C/OC2(C)Oc3c(C)c(O)c4c(O)c(c(/C=N/N5CCN(C6CCCC6)CC5)c(O)c4c3C2=O)NC(=O)/C(C)=C\C=C\C(C)C(O)C(C)C(O)C(C)C(O)C1C	0.977	valid
COc1cc(-c2cn([C@H]3CCc4c(F)cccc4N(CC(F)(F)F)C3=O)nn2)ccc1-n1cnc(C)n1	0.976	valid
O=C(O)c1cn(Cc2ccc(-c3ccc(F)nc3)cn2)c2c(F)cccc2c1=O	0.976	valid
COc1c(C)c2c(c(O)c1CC=C(C)CCC(=O)O)C(=O)OC2	0.975	valid
C[C@H](CO)Nc1nc(SCc2cccc(F)c2F)nc2nc(N)sc12	0.974	valid
CC(C)(Oc1ccc(Cl)cc1)C(=O)O	0.973333	valid
c1cn2cc(-c3ccc4cn[nH]c4c3)nc(Nc3ccc(N4CCOCC4)cc3)c2n1	0.973	valid
O=C(NCc1ccc(S(=O)(=O)c2cc(F)cc(F)c2)cc1)c1cc2cnccc2[nH]1	0.972	valid
O=C(O)c1cn(Cc2cnc(-c3ccccc3)cn2)c2c(F)cccc2c1=O	0.971	valid
CCCCCc1cc(O)c2c(c1)OC(C)(C)[C@@H]1CCC(C)=C[C@@H]21	0.97	valid
Fc1ccc([C@@H]2CN(CCc3ccccc3)CC[C@H]2c2cc(-c3ccc(Cl)cc3)n[nH]2)cc1	0.97	valid
CCNCC#CCOC(=O)C(O)(c1ccccc1)C1CCCCC1	0.97	valid
C#CC1(O)CCC2C3CCc4cc(O)ccc4C3CCC21C	0.97	valid
COc1cc2c(cc1O)CCN[C@]21CS[C@@H]2c3c(OC(C)=O)c(C)c4c(c3[C@H](COC1=O)N1[C@@H](O)[C@@H]3Cc5cc(C)c(OC)c(O)c5[C@H]([C@H]21)N3C)OCO4	0.97	valid
C[C@]1(c2ccc(OC(F)(F)F)cc2)C[C@](O)(c2ccccn2)CO1	0.97	valid
Cc1ncc2c(c1O)COC2c1ccc(Cl)cc1	0.97	valid
CCNC(=O)Nc1ccc(-c2nc3c(c(N4CCOC[C@@H]4C)n2)CCN(c2nc(C)ns2)C3)cc1	0.97	valid
CC(C)CC(NC(=O)C(CCc1ccccc1)NC(=O)CN1CCOCC1)C(=O)NC(Cc1ccccc1)C(=O)NC(CC(C)C)C(=O)C1(C)CO1	0.97	valid
Cc1noc2c(Cl)c3c(cc12)CC1(C(=O)NC(=O)NC1=O)C1C(C)OC(C)CN31	0.97	valid
N#CC[C@H](C1CCCC1)n1cc(-c2ncnc3[nH]ccc23)cn1	0.97	valid
O=C1c2cc([N+](=O)[O-])ccc2-n2c1nc1ccccc1c2=O	0.969	valid
[3H]C(C1=C(C)c2ccc(OCc3ccc(CCC)cc3OC)cc2CC1)N1CC(C(=O)O)C1	0.968	valid
COc1cc(N2CCN(C(C)=O)CC2)ccc1Nc1ncc(Cl)c(-c2cnc3ccccn23)n1	0.967	valid
CC(C)(C)NC(=O)[C@@H](c1cccnc1)N(C(=O)c1ccco1)c1ccc(C(C)(C)C)cc1	0.967	valid
COc1ccc2c(c1)N(C[C@H](C)CN(C)C)c1ccccc1S2	0.966	valid
C[C@@](C(=O)O[C@H]1C[N+]2(CCc3cccc(Cl)c3)CCC1CC2)(c1ccccc1)N1CCCCC1	0.965	valid
O=C(O)c1cn(Cc2ccc(-c3ccnc(Cl)c3)cn2)c2c(F)cccc2c1=O	0.965	valid
CCN1CCN(CC(=O)Nc2ccc(-c3cccc4c(=O)cc(N5CCOCC5)oc34)c3sc4ccccc4c23)CC1	0.964	valid
COc1ccc(C23c4ccccc4C(=O)N2CCN3C(=O)c2ccc(F)c(F)c2)cc1	0.963	valid
C[C@@H](NC(=O)C1CCCCN1C)c1ccc(Nc2ncc3cc(-c4ccncc4)ccc3n2)cc1	0.962	valid
COCCCOc1ccnc(CS(=O)c2nc3ccccc3[nH]2)c1C	0.9615	valid
CCCc1nn(C)c2c(O)nc(-c3cc(S(=O)(=O)N4CCN(C)CC4)ccc3OCC)nc12	0.96	valid
Cc1ccsc1C(=CCCN1CCCC(C(=O)O)C1)c1sccc1C	0.96	valid
Cc1n[nH]c(C)c1[C@H](C)NC(=O)COc1cc(C(F)(F)F)c2c(-c3ccccc3)nn(C)c2n1	0.96	valid
Cc1ccccc1C(=O)Nc1cccc(NC(=O)CC(C)C)c1	0.96	valid
CN1CCN(C2=Nc3cc(Cl)ccc3Nc3ccccc32)CC1	0.96	valid
Nc1nc2ccc(OC(F)(F)F)cc2s1	0.96	valid
CC(C)(C)N1CCC(c2ccccc2)(c2ccccc2)CC1	0.96	valid
CO[C@]12CC[C@@]3(C[C@@H]1[C@](C)(O)C(C)(C)C)[C@H]1Cc4ccc(O)c5c4[C@@]3(CCN1CC1CC1)[C@H]2O5	0.96	valid
CN(C)CCN(C)n1cc(-c2ccccc2)c2ccccc21	0.96	valid
COc1ccc2c(c1)N(CCN1CCC(NCc3ccc4c(n3)NC(=O)CO4)CC1)C(=O)CC2	0.96	valid
O=C(O[C@@H]1CC[C@@H](c2cccc(F)c2F)[C@H](O)c2cccnc21)N1CCC(n2c(=O)[nH]c3ncccc32)CC1	0.959	valid
CC1CN2c3c(cc4c(C(C)(C)C)noc4c3F)CC3(C(=O)NC(=O)NC3=O)C2C(C)O1	0.958	valid
OC[C@H](Nc1ncc(Cl)c(Nc2cc(C3CC3)[nH]n2)n1)c1ccc(F)cc1	0.956	valid
CCC1=C(C)CN(C(=O)NCCc2ccc(S(=O)(=O)NC(=O)N[C@H]3CC[C@H](C)CC3)cc2)C1=O	0.955	valid
COCCOc1cnc2ccc([C@H](C)n3nnc4ccn(-c5ccc(F)c(F)c5)c(=O)c43)cc2c1	0.955	valid
CN(C)C(=O)Cn1cc(-c2nc([C@@](C)(c3ccc(-c4cnc(N)nc4)cc3)C3CC3)no2)cn1	0.953	valid
CN(C)Cc1cccc(-c2ccc(Cn3cc(C(=O)O)c(=O)c4cccc(F)c43)cc2)c1	0.952	valid
O=C(O)c1cn(Cc2ccc(-c3cccnc3)cn2)c2c(F)cccc2c1=O	0.951	valid
CC(CN(C)C)CN1c2ccccc2CCc2ccccc21	0.95	valid
O=S(=O)(c1ccc(C(F)(F)F)cn1)N1CCC2(CC1)OC(c1cc(Cl)cc[n+]1[O-])c1ccccc12	0.95	valid
CCCCC(=O)N(Cc1ccc(-c2ccccc2-c2nn[nH]n2)cc1)[C@H](C(=O)O)C(C)C	0.95	valid
CN1CCN(CCCN2c3ccccc3Sc3ccccc32)CC1	0.95	valid
CN1c2ccccc2C(NCCCCCCC(=O)O)c2ccc(Cl)cc2S1(=O)=O	0.95	valid
COc1cc(NCc2ccc3nc(N)nc(N)c3c2C)cc(OC)c1OC	0.95	valid
O=[N+]([O-])c1ccc2c(ccn2-c2ccc(O[C@H]3O[C@H](CO)[C@@H](O)[C@H](O)[C@@H]3O)c(F)c2)c1	0.95	valid
CN(C)CC=CC(=O)Nc1cc2c(Nc3ccc(F)c(Cl)c3)ncnc2cc1OC1CCOC1	0.95	valid
CC(C)C(=O)Nc1ccc([N+](=O)[O-])c(C(F)(F)F)c1	0.95	valid
COc1cc(NS(=O)(=O)c2ccc(N)cc2)nc(OC)n1	0.95	valid
O=C(O)[C@@H]1C[C@H](Oc2ccc(Cl)c(F)c2)CN1	0.95	valid
Cn1cc2cc(-c3cc(F)c(CN4CCn5nccc5C4=O)c(F)c3)ccc2n1	0.95	valid
Cc1ccc(-c2nccn2C)cc1NC(=O)c1ccc(OCc2ccccn2)cc1	0.949	valid
CC(C)c1ccc2c(c1)CC[C@@H]1[C@]2(C)CCC[C@@]1(C)CNS(=O)(=O)c1c(F)c(F)c(F)c(F)c1F	0.948	valid
CN(C)Cc1nccn1-c1ccc(N2CCC(NS(=O)(=O)c3ccc4cc(Cl)ccc4c3)C2=O)c(F)c1	0.947	valid
CNCCC(Oc1ccc(C(F)(F)F)cc1)c1ccccc1	0.945	valid
Nc1ncnc2c1C(=O)N(c1ccc(-c3ccc(CC(=O)O)cc3Cl)cc1)CCO2	0.944	valid
Cc1cc2ccc1[C@@H](C)COC(=O)Nc1ccc(C3(C(=O)O)CCOCC3)c(c1)CN(C)C(=O)[C@@H]2Nc1ccc2c(N)ncc(F)c2c1	0.942	valid
CS(=O)(=O)c1ccc(-c2cnc(N)c(-c3cccc(C(F)(F)F)c3)c2)cc1	0.941	valid
OCc1cc(C(O)CNCCCCCCOCCOCc2c(Cl)cccc2Cl)ccc1O	0.94	valid
Cc1cnc(NCCc2ccccn2)c(=O)n1CC(=O)NCc1cccc(Cl)c1	0.94	valid
CCCN(CC)C(CC)C(=O)Nc1c(C)cccc1C	0.94	valid
COC(=O)c1ccc(-c2ccc(O[C@H]3O[C@H](CO)[C@@H](O)[C@H](O)[C@@H]3O)c(Cl)c2)cc1	0.94	valid
CN1CCc2cccc3c2[C@H]1Cc1ccc(O)c(O)c1-3	0.94	valid
CC(=O)O[C@]1(C(C)=O)CC[C@H]2[C@@H]3CCC4=CC(=O)CCC4=C3[C@@H](c3ccc(N(C)C)cc3)C[C@@]21C	0.94	valid
CNC(=O)c1c(C(N)=O)nc2n1CCOc1ccc(C#C[C@@](C)(O)c3cc(C)on3)cc1-2	0.94	valid
CCN(C)Cc1nccn1-c1ccc(N2CCC(NS(=O)(=O)/C=C/c3ccc(Cl)s3)C2=O)c(F)c1	0.938	valid
CN(C)CCNC(=O)c1cnc(N)c2cc(-c3ccc(S(=O)(=O)NC(C)(C)C)cc3)sc12	0.936	valid
Cc1onc(-c2ccccc2)c1C(=O)N[C@@H]1C(=O)N2[C@@H](C(=O)O)C(C)(C)S[C@H]12	0.935	valid
N#CC1(c2ccccn2)CCN(Cc2cc(C(=O)NC3CCCCC3)c(=O)n3ccccc23)CC1	0.934	valid
CO[C@H]1C=CO[C@@]2(C)Oc3c(C)c(O)c4c(O)c(c(C=NN5CCN(C6CCCC6)CC5)c(O)c4c3C2=O)NC(=O)C(C)=CC=C[C@H](C)[C@H](O)[C@@H](C)[C@@H](O)[C@@H](C)[C@H](O)[C@@H]1C	0.932	valid
CC1=C(CC(=O)O)c2cc(F)ccc2C1=Cc1ccc(S(C)=O)cc1	0.9305	valid
Cn1cnc(S(=O)(=O)N2C[C@H]3[C@@H](C2)[C@]3(CNC(=O)c2ccccc2C(F)(F)F)CC2CC2)c1	0.93	valid
O=C(NC[C@H]1CN(c2ccc(N3CCOCC3=O)cc2)C(=O)O1)c1ccc(Cl)s1	0.93	valid
CN1CC(C(=O)NC2(C)OC3(O)C4CCCN4C(=O)C(Cc4ccccc4)N3C2=O)CC2c3cccc4[nH]cc(c34)CC21	0.93	valid
C=CC(=O)Nc1ccc(S(=O)(=O)N2CCN(C(=O)C3CCCC3)CC2)cc1	0.93	valid
NC(=O)C(=O)C(Cc1ccccc1)NC(=O)c1cccnc1-n1ccc(-c2ccc(F)cc2)n1	0.93	valid
C[C@@H]1CC[C@H]2[C@@H](C)[C@H](OC(=O)CCC(=O)O)O[C@@H]3O[C@@]4(C)CC[C@@H]1[C@@]23OO4	0.93	valid
CO[C@H]1CC[C@@H](n2nc(C)c(C(=O)N[C@@H](C)C(C)(C)C)c2NS(=O)(=O)c2ccc(C)cc2)CC1	0.927	valid
C[C@@H](Oc1cc2c(cc1Cl)N(CCC(=O)O)C(=O)CO2)c1ccccn1	0.925	valid
CN(C)S(=O)(=O)n1cc(-c2nc(-c3nc(C4(c5ccccc5)CC4)n(C)n3)cnc2N)cn1	0.922	valid
CNc1noc2c(-c3ccc4c(N5CCOC[C@@H]5C)nncc4c3)c(C)ccc12	0.92	valid
COC1CC2CCC(C)C(O)(O2)C(=O)C(=O)N2CCCCC2C(=O)OC(C(C)CC2CCC(O)C(OC)C2)CC(=O)C(C)C=C(C)C(O)C(OC)C(=O)C(C)CC(C)C=CC=CC=C1C	0.92	valid
Cn1ncc(C(=O)N2[C@H]3CC[C@@H]2C[C@H](Nc2n[nH]c4ccc(F)cc24)C3)c1Cl	0.92	valid
O=C(CCCN1CCC(O)(c2ccc(Cl)cc2)CC1)c1ccc(F)cc1	0.92	valid
CC(C(N)=O)c1ccc(OS(=O)(=O)C(F)(F)F)cc1	0.92	valid
O=C(N[C@@H]1CCC[C@H](O)C1)c1noc(-c2ccc(C(F)(F)F)cc2)c1CO	0.919	valid
C[C@@]12CCCCC[C@@H](Cc3ccc(O)cc31)[C@@H]2N	0.916	valid
C[C@@](C(=O)O[C@H]1C[N+]2(CCCc3ccccc3)CCC1CC2)(c1ccccc1)N1CCCCC1	0.914	valid
C=CC(=O)Nc1cc(Nc2ncc(C#N)c(-c3cn(C)c4ccccc34)n2)c(OC)cc1N(C)CCN(C)C	0.911	valid
CN1CCC(=C2c3ccccc3CCc3sccc32)CC1	0.91	valid
CNS(=O)(=O)c1cc(-c2sc(NC(C)=O)nc2C)cc2c1C(=O)N([C@@H](C)C1CC1)C2	0.91	valid
C[C@H]1[C@H](NC(=O)/C(=N\OC(C)(C)C(=O)O)c2csc(N)n2)C(=O)N1C(=O)NS(=O)(=O)n1nc(-c2cc(=O)c(O)c[nH]2)n(CC2(CS(C)(=O)=O)CC2)c1=O	0.91	valid
N#Cc1ccc2ccc(=O)n(CCN3CC[C@H](NCc4cc5c(cn4)OCCO5)[C@@H](F)C3)c2c1	0.91	valid
Cn1ncc2ccc(Nc3n[nH]c4cccnc34)cc21	0.907	valid
Nc1ncnc2c1C(=O)N(c1ccc(-c3c(F)cccc3F)cc1)CCO2	0.905	valid
COCc1noc2c(F)c3c(cc12)CC1(C(=O)NC(=O)NC1=O)C1C(C)OC(C)CN31	0.904	valid
C[C@@H](Oc1cc2cnn(CCC(=O)O)c2cc1Cl)c1ccccn1	0.901	valid
COc1cc2c(Nc3ccc(Br)cc3F)ncnc2cc1OCC1CCN(C)CC1	0.9	valid
CCN(CC)Cc1cc(Nc2ccnc3cc(Cl)ccc23)ccc1O	0.9	valid
CC(=CCC1=C(C)C(=O)c2ccccc2C1=O)CCCC(C)CCCC(C)CCCC(C)C	0.9	valid
NCC(NC(=O)c1ccc(-c2cc(F)c(Cl)c(F)c2)[nH]1)c1ncc(CO)s1	0.9	valid
C=C1C[C@@H]2[C@H](CC[C@]3(C)C(=O)CC[C@@H]23)[C@@]2(C)C=CC(=O)C=C12	0.9	valid
COC1C(=O)C2(C)C(OC)CC3OCC3(OC(C)=O)C2C(OC(=O)c2ccccc2)C2(O)CC(OC(=O)C(O)C(NC(=O)OC(C)(C)C)c3ccccc3)C(C)=C1C2(C)C	0.9	valid
O=C1CC(=O)N(CCc2ccccc2)C(=O)N1CCc1ccccc1	0.9	valid
COc1cnc(NS(=O)(=O)c2ccc(N)cc2)nc1	0.9	valid
CO[C@@]1(NC(=O)C2SC(=C(C(N)=O)C(=O)O)S2)C(=O)N2C(C(=O)O)=C(CSc3nnnn3C)CS[C@@H]21	0.895	valid
OC(c1ccccc1)(c1ccccc1)C12CC[N+](CCOCc3ccccc3)(CC1)CC2	0.89	valid
[11CH3]NC(=O)[C@@H](Cc1ccccc1F)CN1CCC2(CC1)OCCc1cc(F)sc12	0.89	valid
Cc1nnc(SCC2=C(C(=O)O)N3C(=O)C(NC(=O)Cn4cnnn4)C3SC2)s1	0.89	valid
CN1[C@H]2CC[C@@H]1Cc1sc(NC(=O)Nc3ccc(Cl)cc3)c(C(N)=O)c12	0.89	valid
Cc1cc(Cl)cnc1C(=O)Nc1ccc(F)c([C@@]2(C)N=C(N)CO[C@@H]2F)c1	0.89	valid
N#Cc1ccc(OCCCN2CCC(C(O)(c3nccs3)C3CCCC3)CC2)cc1	0.883	valid
COc1ccc(N(Cc2cnccc2C)C2CCN([C@H](C)CCNC(=O)c3c(C)ccnc3Cl)CC2)cc1	0.88	valid
Cc1cc(C(=O)N[C@H]2CC[C@@H](NC(=O)c3cc(F)cnc3Oc3cccc(-c4ccc(CN5C[C@H](C)N[C@H](C)C5)c(O)c4)c3)CC2)nn1C	0.88	valid
CC(=O)N1CCN(CCOc2ccc(C3CCN(C4=Nn5c(nnc5C(F)(F)F)CC4)CC3)cc2)CC1	0.88	valid
O=C(Nc1cncc(Oc2cncnc2)n1)c1cc(Cl)ccn1	0.88	valid
CC1c2cccc(O)c2C(=O)C2=C(O)C3(O)C(O)=C(C(N)=O)C(=O)C(N(C)C)C3C(O)C21	0.88	valid
O=C(O)c1cn(Cc2ccc(-c3cncnc3)cc2)c2c(F)cccc2c1=O	0.873	valid
CC(=O)Nc1cc(Nc2cc(NC3CC3)n3ncc(C#N)c3n2)c(F)cc1C	0.87	valid
CCCS(=O)(=O)N1CCN(C2(CNC(=O)c3c(F)cccc3F)CCC(F)(F)CC2)CC1	0.87	valid
C[C@@](C(=O)O[C@H]1C[N+]2(CC(=O)Nc3ccncn3)CCC1CC2)(c1ccccc1)N1CCCCC1	0.87	valid
N#Cc1ccc(N2CCN(Cc3cc(C(=O)O)c(=O)n4ccccc34)CC2)cc1	0.866	valid
CC(C)N(C)c1ccc([C@H]2C[C@@]3(C)[C@@H](CC[C@@]3(O)C#CC(C)(C)C)[C@@H]3CCC4=CC(=O)CC[C@@H]4[C@@H]23)cc1	0.86	valid
CC(=O)N[C@H](Cc1ccc2ccccc2c1)C(=O)N[C@H](Cc1ccc(Cl)cc1)C(=O)N[C@H](Cc1cccnc1)C(=O)N[C@@H](CO)C(=O)N[C@@H](Cc1ccc(O)cc1)C(=O)N[C@H](CCCNC(N)=O)C(=O)N[C@@H](CC(C)C)C(=O)N[C@@H](CCCNC(=N)N)C(=O)N1CCC[C@H]1C(=O)N[C@H](C)C(N)=O	0.86	valid
CCNC(=O)Nc1ccc(-c2nc(N3CCOC[C@@H]3C)c3c(n2)C(C)(C)OC3)cc1	0.86	valid
CS(=O)(=O)c1ccccc1-c1ccc(Cn2cc(C(=O)O)c(=O)c3cccc(F)c32)nc1	0.858	valid
CC(CN(C)C)CN1c2ccccc2Sc2ccccc21	0.85	valid
O=C(OCC(O)CO)c1ccccc1Nc1ccnc2c(C(F)(F)F)cccc12	0.85	valid
COc1cc2c(cc1OC)C1CC(=O)C(CC(C)C)CN1CC2	0.85	valid
CC1OC(OCC2OC(Oc3c(-c4ccc(O)c(O)c4)oc4cc(O)cc(O)c4c3=O)C(O)C(O)C2O)C(O)C(O)C1O	0.85	valid
COC1(CCC(C)COC2OC(CO)C(O)C(O)C2O)OC2CC3C4CC=C5CC(OC6OC(CO)C(OC7OC(C)C(O)C(O)C7O)C(O)C6OC6OC(C)C(O)C(O)C6O)CCC5(C)C4CCC3(C)C2C1C	0.8475	valid
CNC(=O)N1CCc2c(c(N3CCCc4cc(-c5cnn(C)c5)c(C(F)F)cc43)nn2C2CCOCC2)C1	0.84	valid
CC(=O)N1CCc2c(c(N3CCCc4cc(-c5cnn(C)c5)c(C(F)F)cc43)nn2C2CCOCC2)C1	0.84	valid
Cn1nc(-c2ccncc2)cc1NC(=O)[C@H](Cc1ccccc1)NCC(=O)O	0.84	valid
CN1CCC(c2cn(-c3ccc(F)cc3)c3ccc(-c4ncn(C)n4)cc23)CC1	0.83	valid
c1ccc([C@@H]([C@H](c2ccccc2)N2CCCC2)N2CCCC2)cc1	0.83	valid
O=C(O)[C@@H]1C[C@H](OCc2ccc(Cl)cc2)CN1	0.83	valid
NC(=O)Cc1ccc(-c2ccc(N3CCOc4ncnc(N)c4C3=O)cc2)c(Cl)c1	0.828	valid
O=C(Nc1cccc(N2CCCCC2=O)c1)c1ccccc1Br	0.82	valid
CCN(C(=O)Cc1ccc(S(C)(=O)=O)cc1)C1CCN(CC[C@H](c2ccc(S(C)(=O)=O)cc2)c2cc(F)cc(F)c2)CC1	0.82	valid
COc1ccc2c(c1)N(CCN1CCC(NCc3cc4c(cn3)OCCO4)CC1)C(=O)CO2	0.82	valid
CNC(=O)c1ccc(-c2cc(-c3ccc(S(C)(=O)=O)cc3)cnc2N)cc1	0.818	valid
C[C@H]1Cn2c(nnc2C(F)(F)F)CN1C(=O)c1cccc(Cc2n[nH]c(=O)c3ccccc23)c1	0.81	valid
CC(C)[C@@H]1NC(=O)[C@@H](CCCCN)NC(=O)[C@@H](Cc2c[nH]c3ccccc23)NC(=O)[C@H](Cc2ccc(O)cc2)NC(=O)[C@@H](NC(=O)[C@H](N)Cc2ccc3ccccc3c2)CSSC[C@@H](C(=O)N[C@H](C(N)=O)[C@@H](C)O)NC1=O	0.81	valid
CC#CCOc1ccc(C(=O)N[C@H](C(=O)NO)C(C)(C)N)cc1	0.807	valid
Cc1c[nH]c2c(N/C(=C\C#N)N[C@H]3CCCCN(CC(=O)N4CCCC4)C3=O)cccc12	0.8	valid
C=C[C@H]1CN2CC[C@H]1C[C@H]2[C@H](O)c1ccnc2ccc(OC)cc12	0.8	valid
O=C(C1CCCCC1)N1CC(=O)N2CCc3ccccc3[C@@H]2C1	0.8	valid
CC12C=CC(=O)C=C1C(Cl)=CC1C2C(O)CC2(C)C1CCC2(O)C(=O)CO	0.8	valid
COc1ccccc1N1CCN(CCCNc2cc(=O)n(C)c(=O)n2C)CC1	0.8	valid
C[C@H]1O[C@@H](n2cnc3c(N)nc(O[C@H]4CC[C@H](C(F)(F)F)CC4)nc32)[C@H](O)[C@@H]1O	0.8	valid
O=C(O)c1cc(CN2CCC(n3cnc4ccccc43)CC2)c2ccccn2c1=O	0.79	valid
COCCCCC(=NOCCN)c1ccc(C(F)(F)F)cc1	0.785	valid
OC[C@@H]1[C@@H](O)[C@H](O)[C@@H](O)CN1CCCCCCOc1cccc(F)c1	0.78	valid
O=[N+]([O-])c1ccc(C2=NOC(c3ccc(N4CCS(=O)CC4)cc3)C2)o1	0.777	valid
Cc1c(CN2CCN(S(C)(=O)=O)CC2)sc2c(N3CCOCC3)nc(-c3cnc(N)nc3)nc12	0.77	valid
CC(C(=O)O[C@@H]1CC[N+](C)(C)C1)(c1ccccc1)C1CCCC1	0.77	valid
Cn1cc2cc(Cn3cc(C(=O)O)c(=O)c4c(F)cccc43)ccc2n1	0.765	valid
N#Cc1ccc2ccc(=O)n(CCN3CC[C@@H](NCc4cc5c(cn4)OCCO5)[C@@H](O)C3)c2c1	0.76	valid
CCOC(=O)c1cncn1[C@H](C)c1ccccc1	0.755	valid
O=c1cc(-c2ccc(O)c(O)c2)oc2cc(OC3OC(CO)C(O)C(O)C3O)cc(O)c12	0.75	valid
CC(C)(C)NC(=O)N[C@H](C(=O)N1C[C@H]2[C@@H]([C@H]1C(=O)N[C@@H](CC1CCC1)C(=O)C(N)=O)C2(C)C)C(C)(C)C	0.75	valid
CC(=O)OC1CC2CCC3C(CCC4(C)C3CC([N+]3(C)CCCCC3)C4OC(C)=O)C2(C)CC1N1CCCCC1	0.75	valid
COc1ccc(C(=O)Nc2ccccc2CCC2CCCCN2C)cc1	0.74	valid
NC(=O)Nc1cc(-c2cccc(F)c2)sc1C(=O)N[C@H]1CCCNC1	0.74	valid
CCc1cc(N2CC[C@@H](NC)C2)nc(N)n1	0.74	valid
C[C@H]1[C@H](NC(=O)/C(=N\OC(C)(C)C(=O)O)c2nsc(N)n2)C(=O)N1C(=O)NS(=O)(=O)n1nc(-c2cc(=O)c(O)c[nH]2)n(CCCS(C)(=O)=O)c1=O	0.73	valid
CO[C@@H]1CN(CCn2c(=O)ccc3ccc(C#N)cc32)CC[C@H]1NCc1ccc2c(n1)NC(=O)CO2	0.73	valid
O=C1Cc2cc(Cn3cc(C(=O)O)c(=O)c4c(F)cccc43)ccc2N1	0.725	valid
C[C@H]1COCCN1c1nc(-c2ccc(NC(=O)NCCO)cc2)nc2c1COC2(C)C	0.72	valid
O=C1C[C@@H](c2c[nH]c3ccc(F)cc23)C(=O)N1	0.714	valid
CC(C)Oc1cc2c(OC[C@@H]3CCC(=O)N3)nccc2cc1C(N)=O	0.71	valid
Cc1ccc(NC(=O)c2ccc(CN3CCNCC3)cc2)cc1Nc1nccc(-c2cccnc2)n1	0.7	valid
CN(C)C(=O)c1cc2cnc(Nc3ccc(N4CCNCC4)cn3)nc2n1C1CCCC1	0.7	valid
COc1ccc(-c2oc3c(CC=C(C)C)c(OC4OC(CO)C(O)C(O)C4O)cc(O)c3c(=O)c2OC2OC(C)C(O)C(O)C2O)cc1	0.7	valid
CCCS(=O)c1ccc2nc(NC(=O)OC)[nH]c2c1	0.7	valid
CCC(=O)N(c1ccccc1)C1(C(=O)OC)CCN(CCC(=O)OC)CC1	0.7	valid
CC(=O)Nc1cc(Nc2cc(NC3CC3)n3ncc(C#N)c3n2)ccc1N1CC[C@H](N)C1	0.69	valid
COc1ccc(-n2nc(C#N)c3c2C(=O)N(c2ccc(C4(CN5CCCC5)CC4)cc2)CC3)cc1	0.68	valid
NC(=O)c1cc(-c2nc(N)ncc2F)[nH]c1-c1ccccc1	0.68	valid
CO[C@H]1C=CO[C@@]2(C)Oc3c(C)c(O)c4c(O)c(c5c(nc6cc(C)ccn65)c4c3C2=O)NC(=O)C(C)=CC=C[C@H](C)[C@H](O)[C@@H](C)[C@@H](O)[C@@H](C)[C@H](OC(C)=O)[C@@H]1C	0.675	valid
COc1ccc2ncc(=O)n(CCN3CC[C@@H](NCc4cc5c(cn4)OCCO5)[C@@H](OC)C3)c2c1	0.67	valid
O=C(O)/C=C/c1ccc(O)c(O)c1	0.66	valid
O=C(O)c1cn(-c2cccc([N+](=O)[O-])c2)c2cc(N3CCNCC3)c(F)cc2c1=O	0.66	valid
C[C@H](N[C@@H](CCc1ccccc1)C(=O)O)C(=O)N1[C@H](C(=O)O)C[C@H]2CCCC[C@@H]21	0.65	valid
CN(C)[C@@H]1C(O)=C(C(N)=O)C(=O)[C@@]2(O)C(O)=C3C(=O)c4c(O)ccc(Cl)c4[C@@H](O)[C@H]3C[C@@H]12	0.65	valid
CN(C)C1C(=O)C(C(N)=O)=C(O)C2(O)C(O)=C3C(=O)c4c(O)cccc4C(C)(O)C3CC12	0.65	valid
CCn1nc(C(=O)O)c(=O)c2cc3c(cc21)OCO3	0.64	valid
Cc1cc(C[C@@H](NC(=O)N2CCC(c3cc4ccccc4[nH]c3=O)CC2)C(=O)N2CCN(C3CCN(C)CC3)CC2)cc2cn[nH]c12	0.63	valid
COc1ccc(C[C@H](C)NC[C@@H](O)c2ccc(O)c(NC=O)c2)cc1	0.625	valid
O=C1CN(N=Cc2ccc([N+](=O)[O-])o2)C(=O)N1	0.62	valid
CO[C@@]1(NC(=O)[C@H](C(=O)O)c2ccc(O)cc2)C(=O)N2C(C(=O)O)=C(CSc3nnnn3C)CO[C@@H]21	0.61	valid
CC(Oc1c(Cl)cccc1Cl)C1=NCCN1	0.6	valid
COc1ccc(-c2oc3c(CC=C(C)C)c(OC4OC(CO)C(O)C(O)C4O)cc(O)c3c(=O)c2OC2OC(C)C(O)C(O)C2OC2OC(CO)C(O)C(O)C2O)cc1	0.6	valid
CC1(C)S[C@@H]2[C@H](NC(=O)Cc3ccccc3)C(=O)N2[C@H]1C(=O)O	0.6	valid
CCC1(CC)C(=O)NCC(C)C1=O	0.6	valid
C[C@@](C(=O)OC1CC[N+](C)(C)CC1)(c1ccccc1)C1CCCC1	0.58	valid
Cc1ccc(=O)n(-c2ccccc2)c1	0.58	valid
CN[C@@H]1CCN(c2nc(N)nc3c2oc2ncc(Cl)cc23)C1	0.57	valid
c1cnc(OC[C@H]2C[C@H](c3ccc(CN4CCCC4)cc3)C2)nc1	0.56	valid
Nc1c2c(nc3ccccc13)CCCC2	0.55	valid
CCN(CC)CCC[C@@H](C)Nc1ccnc2cc(Cl)ccc12	0.55	valid
CNC(=O)N(Cc1ccsc1)C1CCN([C@H](C)CCNC(=O)c2c(C)cc(Cl)nc2C)CC1	0.54	valid
CCC1(O)CN2CCC1CC2C(O)c1ccnc2ccc(OC)cc12	0.53	valid
O=C(C=Cc1ccc(O)c(O)c1)OC1CC(O)(C(=O)O)CC(O)C1O	0.52	valid
CCN1CCN(c2cc3c(cc2F)c(=O)c(C(=O)O)cn3-c2ccc(OC)cc2)CC1	0.51	valid
CC1(C)CC(c2ccc(OC3CCN(C4CCC4)CC3)cc2)=NNC1=O	0.5	valid
CC(C)N(CC[C@H](c1ccccc1)c1cc(CO)ccc1O)C(C)C	0.5	valid
NC(=O)N1c2ccccc2[C@@H]2O[C@@H]2c2ccccc21	0.5	valid
Oc1ccc2c3c1OC1C(O)CCC4(O)C(C2)N(CC2CCC2)CCC314	0.5	valid
Nc1nc(NC2CC2)c2ncn(C3C=CC(CO)C3)c2n1	0.5	valid
NC1=NC(=O)[C@@H](c2ccccc2)O1	0.5	valid
O=C(N[C@H]1C2CC3CC1C[C@](O)(C3)C2)c1cnc(NC2CCOCC2)nc1C1CCC1	0.48	valid
CCNC(=O)C1CCCN1C(=O)C(CCCN=C(N)N)NC(=O)C(CC(C)C)NC(=O)C(CC(C)C)NC(=O)C(Cc1ccc(O)cc1)NC(=O)C(CO)NC(=O)C(Cc1c[nH]c2ccccc12)NC(=O)C(Cc1c[nH]cn1)NC(=O)C1CCC(=O)N1	0.46	valid
CN1CC[C@@]23CCCC[C@@H]2[C@@H]1Cc1ccc(O)cc13	0.45	valid
C=CCN1CCC23c4c5ccc(O)c4OC2C(=O)CCC3(O)C1C5	0.45	valid
COc1cnc(C(=O)Nc2ccc(F)c([C@]3(C)COCC(N)=N3)c2)cn1	0.44	valid
Cc1cc(Cl)nc(C)c1C(=O)NCC[C@@H](C)N1CCC(N(Cc2ccsc2)C(=O)NCc2ccc(C(=O)O)cc2)CC1	0.42	valid
NS(=O)(=O)Cc1noc2ccccc12	0.4	valid
CC1CCN(C(=O)CC#N)CC1N(C)c1[nH]cnc2nccc1-2	0.4	valid
CC1(C)CC1C(=O)NC(=CCCCCSCC(N)C(=O)O)C(=O)O	0.4	valid
CCN(CC)CCNC(=O)c1cc(Br)c(N)cc1OC	0.4	valid
CCNC(=O)Nc1ccc(-c2nc3c(c(N4CCOC[C@@H]4C)n2)[C@H]2CC[C@@H](C3)N2C)cc1	0.38	valid
N[C@@H](C(=O)N[C@@H]1C(=O)N2C(C(=O)O)=C(Cl)CS[C@H]12)c1ccccc1	0.375	valid
CCNC(C)Cc1cccc(C(F)(F)F)c1	0.36	valid
O=C(O)c1ccc(O)cc1	0.353	valid
CN1CCC23c4c5ccc(O)c4OC2C(O)C=CC3C1C5	0.35	valid
Cc1cc(=O)n(C[C@H](N)[C@H]2CC[C@H](NCc3ncc4c(n3)NC(=O)CO4)CC2)c2cc(F)ccc12	0.34	valid
CC1(C)SC2C(NC(=O)C(NC(=O)N3CCN(S(C)(=O)=O)C3=O)c3ccccc3)C(=O)N2C1C(=O)O	0.32	valid
COc1cc2c(cc1OC)[C@@H](Cc1cc(OC)c(OC)c(OC)c1)[N@+](C)(CCCOC(=O)CCC=CCCC(=O)OCCC[N@+]1(C)CCc3cc(OC)c(OC)cc3[C@H]1Cc1cc(OC)c(OC)c(OC)c1)CC2	0.3	valid
C=CC[N+]1(C2CC3C4CCC5CC(O)C(N6CCOCC6)CC5(C)C4CCC3(C)C2OC(C)=O)CCCC1	0.3	valid
CC(C)(C)NCC(O)COc1cccc2c1CC(O)C(O)C2	0.3	valid
OCC1OC(O)C(O)C(O)C1O	0.3	valid
CC(C)NC[C@H](O)c1ccc(O)c(O)c1	0.29	valid
NC(=O)OCC1C(NC(=O)C(=NOCC(=O)O)c2csc(N)n2)C(=O)N1S(=O)(=O)O	0.28	valid
O=C(O)[C@@H]1C[C@H](Cc2cccc(F)c2)CN1	0.27	valid
CCCC(=O)Nc1ccc(OCC(O)CNC(C)C)c(C(C)=O)c1	0.26	valid
Nc1nc(O)c2ncn([C@@H]3O[C@H](COP(=O)(O)OP(=O)(O)OP(=O)(O)O)[C@@H](O)[C@@H]3O)c2n1	0.25	valid
O=C(O)[C@H]1/C(=C/CO)O[C@@H]2CC(=O)N21	0.25	valid
c1nc(N[C@H]2CC[C@H](N3CCOCC3)CC2)c2c(C3CCOCC3)c[nH]c2n1	0.24	valid
CCNCC(O)c1cccc(O)c1	0.23	valid
CCN(CC)C(=O)[C@@]1(c2ccccc2)C[C@H]1CN	0.22	valid
CC[C@@H](c1cccc(O)c1)[C@@H](C)CN(C)C	0.2	valid
CNCC(O)c1ccc(O)c(O)c1	0.2	valid
CCOC(=O)C(CCc1ccccc1)NC(C)C(=O)N1C(=O)N(C)CC1C(=O)O	0.2	valid
NCC1OC(OC2C(CO)OC(OC3C(O)C(N)CC(N)C3OC3OC(CN)C(O)C(O)C3N)C2O)C(N)C(O)C1O	0.2	valid
C[C@H](N)Cc1ccccc1	0.2	valid
Nc1n[n+]([O-])c2ccccc2[n+]1[O-]	0.19	valid
N=C(N)Nc1nc(CSCCC(=N)NS(N)(=O)=O)cs1	0.17	valid
CCN1CCCC1CNC(=O)c1cc(S(=O)(=O)CC)c(N)cc1OC	0.16	valid
COC1C(O)CC(OC2C(O)CC(OC3C(O)CC(OC4CCC5(C)C(CCC6C5CC(O)C5(C)C(C7=CC(=O)OC7)CCC65O)C4)OC3C)OC2C)OC1C	0.15	valid
COC(=O)[C@H](c1ccccc1)[C@H]1CCCCN1	0.15	valid
CN[C@@H](C)Cc1ccccc1	0.15	valid
NCCC(O)(P(=O)(O)O)P(=O)(O)O	0.14	valid
CC(C)N1CCN(C(=O)c2ccc(CN3CCOCC3)cc2)CC1.O=C(O)/C=C\C(=O)O	0.124	valid
Nc1cc(-c2ccncc2)c[nH]c1=O	0.11	valid
CN1[C@H]2C[C@H](OC(=O)[C@H](CO)c3ccccc3)C[C@@H]1[C@@H]1O[C@H]12	0.1	valid
Cc1c(O)c(=O)ccn1C	0.1	valid
CC(O)C1C(=O)N2C(C(=O)O)=C(SC3CC(C(=O)N4CCC(NC(=O)CN=C(N)N)C4)N(C)C3)C(C)C12	0.09	valid
CC(C)(C)NC[C@@H](O)c1ccc(O)c(CO)c1	0.08	valid
CC[N+]1(C)C2CC(OC(=O)C(CO)c3ccccc3)CC1C1OC12	0.07	valid
Nc1ccn(C[C@@H](CO)OCP(=O)(O)O)c(=O)n1	0.06	valid
CN1CCC[C@H]1c1cccnc1	0.05	valid
NCCCNCCSP(=O)(O)O	0.04	valid
C[C@@H](Cn1ncnn1)Nc1ncc2cc(Oc3ccc(F)cc3F)c(=O)n(C)c2n1	0.033	valid
NCC1CCC(C(=O)O)CC1	0.03	valid
Cc1cnc(C(=O)O)c[n+]1[O-]	0.02	valid
COCC(=O)Nc1c(I)c(C(=O)NCC(O)CO)c(I)c(C(=O)N(C)CC(O)CO)c1I	0.01	valid
Nc1ccn([C@@H]2O[C@H](CO)[C@@H](O)C2(F)F)c(=O)n1	0	valid
Cn1ccnc1S	0	valid
N=c1nc(N2CCCCC2)cc(N)n1O	0	valid
CCC1(C)CC(=O)NC1=O	0	valid
CCN(CC)C(=O)N1CCN(C)CC1	0	valid
CCC1(C)OC(=O)N(C)C1=O	0	valid
COc1nc2ccc(Br)cc2cc1C(c1ccccc1)C(O)(CCN(C)C)c1cccc2ccccc12	1	train
CCCCN(CCCC)CC(O)c1cc(Cl)cc2c1-c1ccc(Cl)cc1C2=Cc1ccc(Cl)cc1	1	train
CN1CCN(CCCN2c3ccccc3Sc3ccc(C(F)(F)F)cc32)CC1	1	train
Cc1c(C)c2c(c(C)c1O)CCC(C)(COc1ccc(CC3SC(=O)NC3=O)cc1)O2	1	train
CC(C=CC(C)C(C)(C)O)C1CCC2C(=CC=C3CC(O)CC(O)C3)CCCC21C	1	train
COc1ccc2c(OC3CC4C(=O)NC5(C(=O)NS(=O)(=O)C6CC6)CC5C=CCCCCN(C)C(=O)C4C3)cc(-c3nc(C(C)C)cs3)nc2c1C	1	train
O=C(O)c1cc(N=Nc2ccc(O)c(C(=O)O)c2)ccc1O	1	train
CCOc1nc2cccc(C(=O)O)c2n1Cc1ccc(-c2ccccc2-c2nn[nH]n2)cc1	1	train
COc1ccc2c(c1)C(=O)N(CCc1ccc(S(=O)(=O)NC(=O)NC3CCCCC3)cc1)C(=O)C2(C)C	1	train
Oc1ccc(Nc2ncc(-c3ccncc3-c3ccccc3Cl)s2)cc1	1	train
CC(=O)NCc1cccc(Cn2nc(NS(=O)(=O)c3ccc(Cl)s3)c3c(O)cccc32)c1	1	train
CCCC(=O)OCOC(O)=C1C(C)=NC(C)=C(C(=O)OC)C1c1cccc(Cl)c1Cl	1	train
COc1ccc(-c2cnccc2-c2cnc(NC(=O)C(C)C)s2)c(C(F)(F)F)c1	1	train
Cc1c(Cl)cccc1Nc1ccccc1C(=O)O	1	train
O=C(O)c1cn(Cc2ccc3ccccc3c2)c2c(F)ccc(F)c2c1=O	1	train
Cc1ccc(-c2cnccc2-c2cnc(NC(=O)C(C)C)s2)c(Cl)c1	1	train
CN(C)C(=O)CCSC(SCCC(=O)O)c1cccc(C=Cc2ccc3ccc(Cl)cc3n2)c1	1	train
COC(=O)NC(C(=O)N1CC2(CC2)CC1c1nc(-c2ccc3c(c2)C(F)(F)c2cc(-c4ccc5[nH]c(C6C7CCC(C7)N6C(=O)C(NC(=O)OC)C(C)C)nc5c4)ccc2-3)c[nH]1)C(C)C	1	train
CC(O)C(C)n1ncn(-c2ccc(N3CCN(c4ccc(OCC5COC(Cn6cncn6)(c6ccc(Cl)cc6Cl)O5)cc4)CC3)cc2)c1=O	1	train
CC(C)(C)CN1CCc2c(cccc2Oc2ncccc2NC(=O)Nc2ccc(OC(F)(F)F)cc2)C1	1	train
O=C(O)c1cn(Cc2ccc(-c3ccc4[nH]ccc4c3)nc2)c2c(F)cccc2c1=O	1	train
C=CC(=O)NCc1coc(-c2c(N)ncnc2Nc2ccc(Oc3cc(C(F)(F)F)nn3C)c(Cl)c2)n1	1	train
COC(=O)c1c(C#N)nc(C)c(C(=O)OC(C)C)c1-c1cccc([N+](=O)[O-])c1	1	train
O=C(O)c1cc(Cc2ccc(Cl)cc2)c2ccccn2c1=O	1	train
COc1ccc2c(C(=S)N(C)CC(=O)O)cccc2c1C(F)(F)F	1	train
C=CC1=C(C)C(=Cc2[nH]c(Cc3[nH]c(C=C4NC(=O)C(C)=C4C=C)c(C)c3CCC(=O)O)c(CCC(=O)O)c2C)NC1=O	1	train
COc1cc(C2c3cc4c(cc3C(OC3OC5COC(c6cccs6)OC5C(O)C3O)C3COC(=O)C23)OCO4)cc(OC)c1O	1	train
CCc1ccc(CCOc2ccc(CC3SC(=O)NC3=O)cc2)nc1	1	train
O=C(C=Cc1ccc(O)c(O)c1C=Cc1ccc(O)c(O)c1)OC(Cc1ccc(O)c(O)c1)C(=O)O	1	train
O=C(O)c1cc(Cc2ccc(-c3ccccn3)cc2)c2ccccn2c1=O	1	train
O=C1OC(c2ccc(O)c(S(=O)(=O)O)c2)(c2ccc(O)c(S(=O)(=O)O)c2)c2c(Br)c(Br)c(Br)c(Br)c21	1	train
O=C(O)c1cc(Cc2ccccc2)c2ccccn2c1=O	1	train
CN1CCN=C(c2ccccc2)c2cc(Cl)ccc21	1	train
CN(CCOc1ccc(CC2SC(=O)NC2=O)cc1)c1ccccn1	1	train
Cc1nn(C2CCCC2)c(C)c1S(=O)(=O)N[C@@H](C)CNc1cccc2c1cnn2-c1ccc(F)nc1	0.99995	train
C[C@H](NC(=O)C(F)(F)F)[C@H](Oc1ccc2c(cnn2-c2ccc(F)cc2)c1)c1ccccc1	0.9999	train
CN(Cc1ccc(F)cc1)c1cc(C(=O)Nc2nncs2)ncn1	0.9999	train
O=C(Nc1ccc(N2C(=O)CC(c3ccccc3)C2=O)c(Cl)c1)c1ccccn1	0.9998	train
CN1CC[C@H](S(=O)(=O)c2c(Cl)ccc(NC(=O)Nc3cccc(Cl)c3Cl)c2O)C1	0.99979	train
C#CCCCC(=O)c1cc(C(C)(C)C)c(O)c(C(C)(C)C)c1	0.99965	train
CCN1CCC(S(=O)(=O)c2c(Cl)ccc(NC(=O)Nc3cccc(F)c3Cl)c2O)CC1	0.99964	train
O=C(Nc1ncc(Cl)s1)[C@H](CC1CCOCC1)n1ncc2c(S(=O)(=O)C3CC3)cccc21	0.9996	train
CC(C)Oc1ccc(NC(=O)c2cc(N(C)Cc3ccc(F)cc3)ncn2)cc1	0.9996	train
Cc1ccc(C(=O)c2cc(O)c(O)c([N+](=O)[O-])c2)cc1	0.9995	train
COc1cc(C)c(C=CC(C)=CC=CC(C)=CC(=O)O)c(C)c1C	0.9995	train
CN(Cc1ccc(C(F)(F)F)nc1)c1cc(C(=O)Nc2ccccc2)ncn1	0.9995	train
CCS(=O)(=O)c1ccc(CC(=O)Nc2cc(-c3cc(C#N)cnc3OCC(F)(F)F)cs2)cc1	0.9994	train
Cc1nc2ccc3c(=O)cc(-c4ccc(N5CCCC5)cc4)oc3c2[nH]1	0.99935	train
Cc1cccc(C(CCCN)(c2ccccc2)c2ccccc2)c1	0.999303	train
O=C(O)CCc1cc(F)c(OCc2c(-c3ccc(Cl)cc3)noc2C(F)(F)F)c(F)c1	0.9993	train
CCn1c(Nc2ccc(N3CCN(C)CC3)cc2)ncc(-c2ccc(-c3cncs3)cc2Cl)c1=O	0.9992	train
O=c1cc(-c2ccc(N3CCCC3)cc2)oc2c1ccc1cc[nH]c12	0.99915	train
CCS(=O)(=O)c1ccc(CC(=O)Nc2cc(-c3cc(C#N)cnc3OC)cs2)cc1	0.9991	train
CN(C)CC(C)(C)COc1cccc(-c2sc(Nc3cccnc3Oc3ccccc3C(C)(C)C)nc2C(F)(F)F)c1	0.999	train
C=C1C(=C/C=C2\CCC[C@@]3(C)[C@H]2CC[C@@H]3[C@H](C)CCCC(C)(C)O)C[C@@H](O)C[C@@H]1O	0.999	train
CC1(C)CCC(CN2CCN(c3ccc(C(=O)NS(=O)(=O)c4ccc(NCC5CCOCC5)c([N+](=O)[O-])c4)c(Oc4cnc5[nH]ccc5c4)c3)CC2)=C(c2ccc(Cl)cc2)C1	0.999	train
CCCCCCO[C@@H](C)c1cccc(-c2csc(NC(=O)c3cc(Cl)c(C=C(C)C(=O)O)c(Cl)c3)n2)c1OC	0.999	train
CCC[C@@]1(CCc2ccccc2)CC(O)=C([C@H](CC)c2cccc(NS(=O)(=O)c3ccc(C(F)(F)F)cn3)c2)C(=O)O1	0.999	train
COc1ccc2c(O[C@@H]3C[C@H]4C(=O)N[C@]5(C(=O)NS(=O)(=O)C6CC6)C[C@H]5C=CCCCCN(C)C(=O)[C@@H]4C3)cc(-c3nc(C(C)C)cs3)nc2c1C	0.999	train
COC(=O)N[C@H](C(=O)N1CCC[C@H]1c1nc2cc([C@H]3CC[C@H](c4cc5nc([C@@H]6CCCN6C(=O)[C@@H](NC(=O)OC)[C@@H](C)OC)[nH]c5cc4F)N3c3cc(F)c(N4CCC(c5ccc(F)cc5)CC4)c(F)c3)c(F)cc2[nH]1)[C@@H](C)OC	0.999	train
CCc1cc(C(C)=NOCc2ccc(C3CCCCC3)c(C(F)(F)F)c2)ccc1CN1CC(C(=O)O)C1	0.999	train
CCc1cc(F)c(N)c2nc(-c3ccc(P(=O)(O)O)o3)n(CC(C)C)c12	0.999	train
NC(=O)c1c(NC(=O)Nc2ccc(Cl)cc2)sc2c1CCN(CCCNC(=O)CCc1c[nH]c3ccccc13)C2	0.999	train
Fc1ccc(CC[C@@H]2CN(Cc3c[nH]c4cc(Cl)ccc34)CCC2(F)F)cc1	0.999	train
N#Cc1ccccc1SC1=C(O)CC(c2ccccc2)CC1=O	0.999	train
Fc1ccc2[nH]cc(CN3CCC(F)(F)[C@@H](CCc4ccccc4)C3)c2c1	0.999	train
CC1=C(C(N)=O)C(c2ccc(OC(C)C)cc2)n2nc(SCc3ccccc3)nc2N1	0.999	train
CCS(=O)(=O)c1ccc([C@@H](NC(C)=O)C(=O)Nc2cc(-c3cccnc3OCc3ccc(OC(F)(F)F)cc3)cs2)cc1	0.999	train
COC(=O)N[C@H](C(=O)N1CCC[C@H]1C(=O)Nc1ccc([C@@H]2CC[C@@H](c3ccc(NC(=O)[C@@H]4CCCN4C(=O)[C@@H](NC(=O)OC)C(C)C)cc3)N2c2ccc(C(C)(C)C)cc2)cc1)C(C)C	0.999	train
COC(=O)N[C@H](C(=O)N1CCC[C@H]1c1nc(-c2ccc3c(c2)O[C@@H](c2ccccc2)n2c-3cc3cc(-c4c[nH]c([C@@H]5CCCN5C(=O)[C@@H](NC(=O)OC)C(C)C)n4)ccc32)c[nH]1)C(C)C	0.999	train
COc1ccc(F)c(-c2ccc(Cc3ccc(N4C[C@H](C(F)(F)F)C[C@@H]4CC(=O)O)cc3)c(C)c2)c1	0.999	train
CCSc1ccc(C2C(C(N)=O)=C(C)Nc3nc(SCc4ccccc4)nn32)cc1	0.999	train
O=C1CC(c2ccccc2)CC(O)=C1Sc1ccccc1Cl	0.999	train
CC(C)c1csc(NC(=O)C2c3ccccc3Oc3ccccc32)n1	0.999	train
CCS(=O)(=O)c1ccc(CC(=O)Nc2cc(-c3cc(C#N)ccc3OC)cs2)cc1	0.999	train
O=C(O)CCc1ccc(OCc2nc(-c3ccc(Cl)cc3)no2)cc1	0.999	train
Cc1cc(C(=O)O)nc(N2C[C@H]3C[C@@H](c4ccccc4C(F)(F)F)C[C@H]3C2)n1	0.999	train
CC1=C(C(N)=O)C(c2ccc(N(C)C)cc2)n2nc(SCc3ccc([N+](=O)[O-])cc3)nc2N1	0.999	train
CN1CCC(S(=O)(=O)c2c(Cl)ccc(NC(=O)Nc3cccc(Cl)c3Cl)c2O)CC1	0.999	train
Cn1nc(-c2cnc3[nH]cc(C(=O)NC(C)(C)C)c3n2)c2cc(OC(F)F)ccc21	0.999	train
CCOC(=O)C1=C(CN2CCOCC2)NC(c2nccs2)=NC1c1ccc(F)cc1Br	0.999	train
CC(C)(C)CN1CCC(c2ccccc2Oc2ncccc2NC(=O)Nc2ccc(OC(F)(F)F)cc2)CC1	0.999	train
Cc1cc(C#N)cc(C)c1Oc1nc(Nc2ccc(C#N)cc2)nc(N)c1Br	0.999	train
O=C(NCc1ccc(F)cc1)C1C(=O)N(O)C(=O)c2ccccc21	0.999	train
CC(C)Cc1ccc([C@@H](C)C(=O)NS(C)(=O)=O)cc1	0.999	train
O=C(NC[C@@H](Cc1ccccc1)N1CCC(O)(C(F)(F)F)CC1)C1(c2ccc(Cl)cc2)CCCC1	0.9989	train
CN(Cc1ccc(C(F)(F)F)cc1)c1cc(C(=O)Nc2ccccc2)ncn1	0.9989	train
N#Cc1ccc(Oc2ccc(S(=O)(=O)Nc3ccc(F)cn3)cc2C#N)cc1Cl	0.9988	train
COc1nc(Nc2cccc3c2nc(-c2ccc(F)cc2)n3C)ccc1-n1cnc(C)c1	0.9987	train
Cc1cc(CCCOc2c(C)cc(-c3noc(C(F)(F)F)n3)cc2C)on1	0.9987	train
CN1CCC(S(=O)(=O)c2c(Cl)ccc(NC(=O)Nc3cccc(F)c3Cl)c2O)CC1	0.9987	train
Cn1nc(-c2cnc3[nH]cc(C(=O)NC(C)(C)C)c3n2)c2ccc(F)cc21	0.9986	train
CN(C)Cc1ccccc1-c1ccc(NC(=O)Nc2cccnc2Oc2ccccc2C(C)(C)C)c(F)c1	0.9985	train
CCCCCCCCc1ccc(CCC(N)(CO)CO)cc1	0.9985	train
COc1ccc([C@@H](Oc2ccc3c(cnn3-c3ccc(F)cc3)c2)[C@H](C)NC(=O)C2CC2)cn1	0.9985	train
Nc1[nH]ncc1-c1cc(Cl)ccc1Oc1cc(F)c(S(=O)(=O)Nc2cscn2)cc1Cl	0.9985	train
Cn1nccc1CCOc1ccc(C2CCN(c3ccc4nnc(C(F)(F)F)n4n3)CC2)cc1	0.9984	train
O=c1[nH]c2ccccc2n1C1CCN(CCCC(c2ccc(F)cc2)c2ccc(F)cc2)CC1	0.9984	train
O=S(=O)(Nc1nncs1)c1cc(Cl)c(Oc2ccc(C(F)(F)F)cc2-c2ccnnc2)cc1F	0.9984	train
Cc1ccc(O)c(C(=O)N[C@H]2CC[C@@H](NC(=O)c3cc(F)cnc3Oc3ccc(F)c(F)c3)CC2)c1	0.9983	train
O=C(O)CCc1cc(F)c(OCc2c(-c3ccccc3)noc2C(F)(F)F)c(F)c1	0.9983	train
CCS(=O)(=O)c1ccc(CC(=O)Nc2cc(-c3cc(C#N)cc(F)c3OC)cs2)cc1	0.9983	train
Cc1cccc(C(CC[C@H](N)C(=O)O)(c2ccccc2)c2ccccc2)c1	0.99809	train
CC(C)(C)c1cc(NC(=O)NC23CC4CC(CC(C4)C2)C3)no1	0.998	train
CCn1c(=O)c(-c2cc(NC(=O)Nc3ccccc3)c(F)cc2Br)cc2cnc(NC)cc21	0.998	train
Cc1nc(N)nc(-c2cc(Cl)cnc2Nc2cnc(Cl)c(NS(=O)(=O)N(C)C)c2)n1	0.998	train
O=C(NC1CCN(CCCCC2(C(=O)NCC(F)(F)F)c3ccccc3-c3ccccc32)CC1)c1ccccc1-c1ccc(C(F)(F)F)cc1	0.998	train
Cc1cnc(NC(=O)NC23CC4CC(CC(C4)C2)C3)s1	0.998	train
COc1cc(-c2cnc3[nH]cc(-c4ccc5[nH]ccc5c4)c3c2)cc(OC)c1OC	0.998	train
CO[C@@H]1[C@H](N(C)C(=O)c2ccccc2)C[C@H]2O[C@]1(C)n1c3ccccc3c3c4c(c5c6ccccc6n2c5c31)C(=O)NC4	0.998	train
CC[C@H](C)n1ncn(-c2ccc(N3CCN(c4ccc(OC[C@H]5CO[C@](Cn6cncn6)(c6ccc(Cl)cc6Cl)O5)cc4)CC3)cc2)c1=O	0.998	train
COC(=O)N[C@H](C(=O)N1CC2(CC2)C[C@H]1c1ncc(-c2ccc3c(c2)C(F)(F)c2cc(-c4ccc5nc([C@@H]6[C@H]7CC[C@H](C7)N6C(=O)[C@@H](NC(=O)OC)C(C)C)[nH]c5c4)ccc2-3)[nH]1)C(C)C	0.998	train
C[C@@](C(=O)O[C@H]1C[N+]2(CCc3c[nH]c4ccccc34)CCC1CC2)(c1ccccc1)N1CCCCC1	0.998	train
C[C@@](C(=O)O[C@H]1C[N+]2(CCc3ccccc3F)CCC1CC2)(c1cccs1)N1CCCCC1	0.998	train
C[C@H](c1ccc(F)cc1)N1C(=O)O[C@](Cc2ccccc2)(c2nc3cc(Cl)ccc3[nH]2)C1=O	0.998	train
CO[C@@H]1[C@H](N(C)C(=O)c2ccccc2)C[C@H]2O[C@]1(C)n1c3ccccc3c3c4c(c5c6ccccc6n2c5c31)C(=O)N[C@H]4O	0.998	train
CN(C(=O)c1ccccc1)[C@@H]1C[C@H]2O[C@@](C)([C@@H]1O)n1c3ccccc3c3c4c(c5c6ccccc6n2c5c31)C(=O)NC4	0.998	train
N#Cc1ccccc1SC1=C(O)CC(c2c(Cl)cccc2Br)CC1=O	0.998	train
C[C@H](c1ccc(F)cc1)N1C(=O)O[C@](Cc2ccccc2)(c2nc3c(C(F)(F)F)cccc3[nH]2)C1=O	0.998	train
Fc1cc(CN2CCO[C@H](COc3ccccc3)C2)ccc1C(F)(F)F	0.998	train
Clc1ccc(CN2CCO[C@H](COc3ccccc3)C2)cc1Cl	0.998	train
O=C(O)c1cn(Cc2ccc(-c3cccc4[nH]ccc34)cc2)c2c(F)cccc2c1=O	0.998	train
CCS(=O)(=O)c1ccc(C(NC(C)=O)C(=O)Nc2cc(-c3cc(C#N)cnc3OCC(F)(F)F)cs2)cc1	0.998	train
Cc1ccc2c(c1)C(=O)N(c1ccc(NC(=O)c3occc3C)c(F)c1)C2=O	0.998	train
C[C@@H](Oc1cc2onc(CCC(=O)O)c2cc1Cl)c1ccc(Cl)cn1	0.998	train
Cc1sc2ncnc(N3CCC(C(=O)Nc4ccc(S(N)(=O)=O)cc4)CC3)c2c1C	0.998	train
CC(C)Oc1ccc(-c2nc(-c3cccc4c3CCC4=O)no2)cc1C#N	0.998	train
Cc1cc(C)c2cc(C(=O)NC3CN(c4cc(Cl)ncc4Cl)C3)ccc2n1	0.998	train
COc1cc(N2CC(NC(=O)c3ccc4nc(C)cc(C)c4c3)C2)c(Cl)cn1	0.998	train
COc1cc(OC)cc(N(CCNC(C)C)c2ccc3ncc(-c4cnn(C)c4)nc3c2)c1	0.998	train
CC(O/N=C(\C(=O)N[C@@H]1C(=O)N(OS(=O)(=O)O)C1(C)C)c1nc(N)sc1Cl)c1cc(=O)c(O)cn1O	0.998	train
O=C(O)c1cn(Cc2ccc(-c3ccc4[nH]ccc4c3)cn2)c2c(F)cccc2c1=O	0.998	train
CC(C)n1nccc1-c1ncccc1COc1cccc(O)c1C=O	0.998	train
O=C(Nc1cc(-c2cc3c([nH]2)C2(CCNC2)CNC3=O)ccn1)c1ccc2ccccc2c1	0.998	train
COc1cc(F)c(-c2c(C)nn3c(C(F)(F)F)cc(C)nc23)cc1F	0.998	train
C[C@@H](C(=O)NS(C)(=O)=O)c1ccc(OS(=O)(=O)C(F)(F)F)cc1	0.998	train
CC(=O)c1cc(C(=O)N[C@@H](C)Cn2ccc(-c3ccc(C#N)c(Cl)c3)n2)n[nH]1	0.998	train
CN(CCOc1ccc(C[C@@H]2SC(=O)NC2=O)cc1)c1ccccn1	0.998	train
COc1ccc(Cc2cc([C@]34OC[C@](CO)(O3)[C@@H](O)[C@H](O)[C@H]4O)ccc2C)cc1	0.99794	train
CC(C)C(O/N=C(\C(=O)N[C@@H]1C(=O)N(OS(=O)(=O)O)C1(C)C)c1nc(N)sc1Cl)c1cc(=O)c(O)cn1O	0.9977	train
CC(C)[C@H](O/N=C(\C(=O)N[C@@H]1C(=O)N(OS(=O)(=O)O)C1(C)C)c1nc(N)sc1Cl)c1cc(=O)c(O)cn1O	0.9977	train
Cc1ccc(C(=O)c2ccc(CC(=O)O)n2C)cc1	0.997667	train
CN(C)CCOc1ccc(C(=C(CCCl)c2ccccc2)c2ccccc2)cc1	0.9975	train
CNC(=O)c1cccc2c(Nc3ccc(NS(C)(=O)=O)cc3OC)c3cccc(C)c3nc12	0.9975	train
CNC1CC2OC(C)(C1OC)n1c3ccccc3c3c4c(c5c6ccccc6n2c5c31)C(=O)NC4O	0.9975	train
COc1ccc(Cl)cc1C1(F)C(=O)Nc2cc(C(F)(F)F)ccc21	0.9975	train
CCC1(O)C(=O)OCc2c1cc1n(c2=O)Cc2cc3c(N)cccc3nc2-1	0.9975	train
CC(C(=O)O)c1ccc(N2CC=CC2)c(Cl)c1	0.9975	train
C[C@@H]1Cc2c([nH]c3ccccc23)[C@@H](c2c(F)cc(/C=C/C(=O)O)cc2F)N1CC(C)(C)F	0.9974	train
CC(C)[C@H](O/N=C(\C(=O)N[C@@H]1C(=O)N(OS(=O)(=O)O)C1(C)C)c1csc(N)n1)c1cc(=O)c(O)cn1O	0.9973	train
CC(C)[C@H](O/N=C(\C(=O)N[C@@H]1C(=O)N(OS(=O)(=O)O)C1(C)C)c1nsc(N)n1)c1cc(=O)c(O)cn1O	0.9973	train
Cc1c(-c2ccccc2)nn(-c2nc(C(=O)O)cs2)c1-c1ccccc1	0.9971	train
CSC[C@H](O/N=C(\C(=O)N[C@@H]1C(=O)N(OS(=O)(=O)O)C1(C)C)c1csc(N)n1)c1cc(=O)c(O)cn1O	0.9971	train
CCCCCCCCc1ccc(CC[C@](N)(CO)COP(=O)(O)O)cc1	0.997	train
CCCCN(CCCC)C[C@H](O)c1cc(Cl)cc2c1-c1ccc(Cl)cc1C2=Cc1ccc(Cl)cc1	0.997	train
C[C@@](C(=O)O[C@H]1C[N+]2(CCCc3cc4ccccc4s3)CCC1CC2)(c1ccccc1)N1CCCCC1	0.997	train
Cc1csc(NC(=O)NC23CC4CC(CC(C4)C2)C3)n1	0.997	train
Cc1cc(C=CC#N)cc(C)c1Nc1ccnc(Nc2ccc(C#N)cc2)n1	0.997	train
Cc1cc(/C=C/C#N)cc(C)c1Nc1ccnc(Nc2ccc(C#N)cc2)n1	0.997	train
COc1ccc2c(c1)C=C1Cn3c-2c(C2CCCCC2)c2ccc(cc23)C(=O)NS(=O)(=O)N(C)CCOCCN(C)C1=O	0.997	train
COc1ccc2c(CN3CCC(F)(F)[C@H](CCc4cccc(F)c4)C3)c[nH]c2c1	0.997	train
CC(C)CN1CCC(COc2ccc(NC(=O)Nc3cccnc3Oc3ccccc3C(C)(C)C)c(F)c2)CC1	0.997	train
COc1cc(N2C(=O)N(c3ccc(-c4ccc(C(=O)O)cc4C)cc3)C(=O)C23CCN(Cc2ncccc2C)CC3)ncn1	0.997	train
C(#Cc1ncn2c1COc1ccccc1-2)c1ccccc1	0.997	train
CC(C)c1ccc(Cc2cc([C@@H]3S[C@H](CO)[C@@H](O)[C@H](O)[C@H]3O)ccc2Cl)cc1	0.997	train
CC(C)(C)c1nc(-c2cccc(NS(=O)(=O)c3c(F)cccc3F)c2F)c(-c2cnc(N)cn2)s1	0.997	train
Cc1cc(COc2ccc(S(=O)(=O)N(C)C3(C(=O)NO)CN(C(=O)CC(C)C)C3)cc2)c2ccccc2n1	0.997	train
COc1cc2nccc(Oc3ccc(NC(=O)C4(C(=O)Nc5ccc(F)cc5)CC4)cc3)c2cc1OC	0.997	train
COc1cc(-n2cnc3cc(-c4ccc(Cl)cc4)sc3c2=O)ccc1OCC1(OP(=O)(O)O)CC(F)(F)C1	0.997	train
O=C(O)C[C@H]1CC[C@H](c2ccc(NC(=O)c3nnc(Nc4ccc(F)c(F)c4)o3)cc2)CC1	0.997	train
C[C@H](CO)Nc1nc(SCc2cccc(F)c2F)nc2[nH]c(=O)sc12	0.997	train
CN1Cc2cccc(Oc3ncccc3NC(=O)Nc3ccc(OC(F)(F)F)cc3)c2C1C(C)(C)C	0.997	train
O=C(Nc1cc(-c2cc3c([nH]2)C2(CCNCC2)CNC3=O)ccn1)c1ccc2ccccc2c1	0.997	train
COc1cccc(C2=NC(C(F)(F)F)(C(F)(F)F)c3c(n(-c4ccc(Cl)cc4)c(=O)[nH]c3=O)N2)c1	0.997	train
Cc1ccc([C@@H](C)Oc2cc3onc(CCC(=O)O)c3cc2Cl)nc1	0.997	train
Cn1nc(-c2cnc3[nH]cc(C(=O)NC(C)(C)C)c3n2)c2ccc(Cl)cc21	0.997	train
Cc1nc(C)c(-c2ccc(-c3ccc(CC(=O)O)cc3Cl)c(Cl)c2)nc1C(N)=O	0.997	train
Cn1nc(-c2cnc3[nH]cc(C(=O)NC(C)(C)CO)c3n2)c2ccc(Cl)cc21	0.997	train
Cc1ccc(C(=O)Nc2ccc(S(=O)(=O)O)c3cc(S(=O)(=O)O)cc(S(=O)(=O)O)c23)cc1NC(=O)c1cccc(NC(=O)Nc2cccc(C(=O)Nc3cc(C(=O)Nc4ccc(S(=O)(=O)O)c5cc(S(=O)(=O)O)cc(S(=O)(=O)O)c45)ccc3C)c2)c1	0.997	train
CCOC(=O)N1CCN(C(=O)[C@H](CCC(=O)O)NC(=O)c2cc(C3CC3)nc(-c3ccccc3)n2)CC1	0.997	train
O=C(O)c1csc(-n2nc(-c3ccccc3)c3c2-c2ccccc2C3)n1	0.9968	train
CSCC(O/N=C(\C(=O)N[C@@H]1C(=O)N(OS(=O)(=O)O)C1(C)C)c1csc(N)n1)c1cc(=O)c(O)cn1O	0.9968	train
CN(Cc1ccc(C(F)(F)F)nc1)c1cc(C(=O)Nc2nncs2)ncn1	0.9968	train
CC(C)Cn1cc(C#N)c2cc(Oc3ccc(NC(=O)[C@@H]4CCCN4)cc3)ccc21	0.9967	train
COc1cc(OC)c(/C=C/S(=O)(=O)Nc2ccc(OC)c(N)c2)c(OC)c1	0.9967	train
COC(=O)N[C@H](C(=O)N[C@@H](Cc1ccc(-c2ccccn2)cc1)C[C@H](O)[C@H](Cc1ccccc1)NC(=O)[C@@H](N1CCN(Cc2ccccc2)C1=O)C(C)(C)C)C(C)(C)C	0.9966	train
O=S(=O)(Nc1cncc(C(F)(F)F)c1)c1ccccc1C(F)(F)F	0.9966	train
CCC(O/N=C(\C(=O)N[C@@H]1C(=O)N(OS(=O)(=O)O)C1(C)C)c1csc(N)n1)c1cc(=O)c(O)cn1O	0.9965	train
CC(O/N=C(\C(=O)N[C@@H]1C(=O)N(OS(=O)(=O)O)C1(C)C)c1nsc(N)n1)c1cc(=O)c(O)cn1O	0.9963	train
CC1(C)[C@H](NC(=O)/C(=N\OC(c2cc(=O)c(O)cn2O)C2CC2)c2csc(N)n2)C(=O)N1OS(=O)(=O)O	0.9961	train
N#Cc1cccc(S(=O)(=O)c2cnc3cc(F)ccc3c2-c2ccc(Cl)cc2)c1	0.9961	train
CCc1ccccc1C(=O)N(C1CCC2(CC1)OCCO2)C(Cc1ccc(Cl)cc1)CN(C)C	0.996	train
Fc1ccc(CC[C@@H]2CN(Cc3c[nH]c4cc(F)ccc34)CCC2(F)F)cc1	0.996	train
Cc1cc(-c2cccc(Cl)c2)ncc1[C@H]1CCCN1C(=O)c1nccs1	0.996	train
O=C(O)c1cn(Cc2ccc(-c3ccccc3)cc2)c2c(F)ccc(F)c2c1=O	0.996	train
CC(C)(O)c1ccccc1CC[C@@H](SCC1(CC(=O)O)CC1)c1cccc(/C=C/c2ccc3ccc(Cl)cc3n2)c1	0.996	train
NC(=O)c1cnc2c(N[C@H]3C[C@H]3F)cc(Nc3cccc(-c4ccc(C(F)(F)F)cc4F)c3)nn12	0.996	train
Cc1ccc(C(=O)Nc2ccc(CN3CCN(C)CC3)c(C(F)(F)F)c2)cc1C#Cc1cnc(N)nc1	0.996	train
O=C(O)c1cn(Cc2ccc3ccccc3c2)c2c(F)cccc2c1=O	0.996	train
COc1cc(-c2ccc(F)c(C)c2)c(F)cc1-n1c(=O)ccc2cc(S(=O)(=O)Nc3ccon3)ccc21	0.996	train
CCOC(=O)C1=C(C)NC(C)=C(C(=O)OC)C1c1cccc(Cl)c1Cl	0.996	train
C[C@@](C(=O)O[C@H]1C[N+]2(CC(=O)Nc3cccc(F)c3)CCC1CC2)(c1ccccc1)N1CCCCC1	0.996	train
Clc1ccc(CN2CCO[C@H](COc3cccc(Cl)n3)C2)cc1	0.996	train
N[C@@H]1CCC=C(c2ccc(F)cc2)[C@H]1CNc1cc(F)c(S(=O)(=O)Nc2cscn2)cc1Cl	0.996	train
C[C@@](C(=O)O[C@H]1C[N+]2(CCC3=CC4CCOC4C=C3)CCC1CC2)(c1ccccc1)N1CCCCC1	0.996	train
CN(C)Cc1ccccc1C(=O)N(CCc1ccc(Cl)cc1)C1CCC2(CC1)OCCO2	0.996	train
CCc1cnc(Oc2ccc(NC(=O)c3ncccc3N)cc2Cl)nc1	0.996	train
CC(O/N=C(\C(=O)N[C@@H]1C(=O)N(OS(=O)(=O)O)C1(C)C)c1csc(N)n1)c1cc(=O)c(O)cn1O	0.9959	train
CC(C)Cc1ccc(C(C)C(=O)O)cc1	0.99585	train
C=CC(=O)N1C[C@@H]2C[C@H]1CN2c1ccc(C(N)=O)c(Oc2ccc(Oc3ccccc3)cc2)n1	0.9954	train
CC1(C)[C@H](NC(=O)/C(=N\OCc2cc(=O)c(O)cn2O)c2csc(N)n2)C(=O)N1OS(=O)(=O)O	0.9953	train
N#Cc1cc(S(=O)(=O)Nc2ncns2)ccc1Oc1ccc(-c2cccc(C(F)(F)F)c2)cc1-c1ccnc(CNCCC2CCNCC2)c1	0.99503	train
CC/C=C/C/C=C/C/C=C/C/C=C/C/C=C/C/C=C/CCC(=O)OC(C(=O)OC1CC2(O)C(OC(=O)c3ccccc3)C3C4(OC(C)=O)COC4CC(O)C3(C)C(=O)C(OC(C)=O)C(=C1C)C2(C)C)C(NC(=O)c1ccccc1)c1ccccc1	0.995	train
Cc1ccc(Nc2nccc(N(C)c3ccc4c(C)n(C)nc4c3)n2)cc1S(N)(=O)=O	0.995	train
C/C=C/C[C@@H](C)[C@@H](O)[C@H]1C(=O)N[C@@H](CC)C(=O)N(C)CC(=O)N(C)[C@@H](CC(C)C)C(=O)N[C@@H](C(C)C)C(=O)N(C)[C@@H](CC(C)C)C(=O)N[C@@H](C)C(=O)N[C@H](C)C(=O)N(C)[C@@H](CC(C)C)C(=O)N(C)[C@@H](CC(C)C)C(=O)N(C)[C@@H](C(C)C)C(=O)N1C	0.995	train
CC(C)COCC(CN(Cc1ccccc1)c1ccccc1)N1CCCC1	0.995	train
Cc1ccccc1-c1cc(N2CCN(C)CC2)ncc1N(C)C(=O)C(C)(C)c1cc(C(F)(F)F)cc(C(F)(F)F)c1	0.995	train
Fc1ccccc1CC[C@@H]1CN(Cc2c[nH]c3cc(Cl)ccc23)CCC1(F)F	0.995	train
Cc1ccc(CN2CCC(F)(F)[C@H](CCc3ccccc3)C2)cc1C	0.995	train
CC(/C=C/C(C)C(C)(C)O)C1CCC2/C(=C/C=C3CC(O)CC(O)C3)CCCC21C	0.995	train
CC[C@@H]1C=C(C)C[C@H](C)C[C@H](OC)[C@H]2O[C@@](O)(C(=O)C(=O)N3CCCC[C@H]3C(=O)O[C@H](C(C)=C[C@@H]3CC[C@H](Cl)[C@H](OC)C3)[C@H](C)[C@@H](O)CC1=O)[C@H](C)C[C@@H]2OC	0.995	train
COC[C@H]1C[C@@H](c2ncc(-c3ccc4c(c3)COc3cc5c(ccc6nc([C@@H]7CC[C@H](C)N7C(=O)[C@@H](NC(=O)OC)C(C)C)[nH]c65)cc3-4)[nH]2)N(C(=O)[C@H](NC(=O)OC)c2ccccc2)C1	0.995	train
CN(C)CC(=O)N(C)C1COc2ccccc2-c2c(C3CCCCC3)c3ccc(C(=O)O)cc3n2C1	0.995	train
CC(=O)N1CCN([C@H]2CCN(C(=O)N(C)[C@H](C)c3cc(C(F)(F)F)cc(C(F)(F)F)c3)[C@@H](c3ccc(F)cc3C)C2)CC1	0.995	train
CCCC(=O)OCOC(=O)C1=C(C)NC(C)=C(C(=O)OC)[C@H]1c1cccc(Cl)c1Cl	0.995	train
CCCC(=O)OCO/C(O)=C1/C(C)=NC(C)=C(C(=O)OC)C1c1cccc(Cl)c1Cl	0.995	train
Cc1nc(-c2cccc3ccccc23)sc1C(=O)N1CCC(CO)CC1	0.995	train
Cc1c(-c2ccc(N3CCC[C@@H](C)C3)cc2)[nH]c2cc(F)cc(F)c2c1=O	0.995	train
O=C(O)c1cn(Cc2ccc(-c3ccccc3)cc2)c2ccccc2c1=O	0.995	train
O=C(NCCc1ccccc1Cl)c1cc(-n2ncc(=O)[nH]c2=O)ccc1Cl	0.995	train
O=C(NCc1ccc(S(=O)(=O)c2ccc(N3CCOCC3)nc2)cc1)c1cc2ccncc2o1	0.995	train
CCCCCOc1ccc(-c2cc(-c3ccc(C(=O)NC4CC(O)C(O)NC(=O)C5C(O)C(C)CN5C(=O)C(C(O)CC(N)=O)NC(=O)C(C(O)C(O)c5ccc(O)c(OS(=O)(=O)O)c5)NC(=O)C5CC(O)CN5C(=O)C(C)(O)NC4=O)cc3)no2)cc1	0.995	train
O=C(Nc1ccccc1Cl)N1CCC(c2nc(-c3ccc4ccccc4n3)no2)CC1	0.995	train
N#CN/C(=N\CCCCCCOc1ccc(Cl)cc1)Nc1ccncc1	0.995	train
CN(C)C(=O)CCSC(SCCC(=O)O)c1cccc(/C=C/c2ccc3ccc(Cl)cc3n2)c1	0.995	train
COc1ccnc(Oc2ccc3c(c2)c(=O)ncn3Cc2c(F)cc(F)cc2F)c1C(F)(F)F	0.995	train
COc1cc(C)c2c(Oc3cccc(C(F)(F)F)c3)c(OC)cc(N[C@H](C)CCCN)c2n1	0.995	train
CCc1cccc(NC(=O)c2cc(Oc3cncc(F)c3)cc(C)n2)n1	0.995	train
Cn1cc(S(=O)(=O)N2CCC3=Cc4c(cnn4-c4ccc(F)cc4)C[C@]3(C(=O)c3cc(C(F)(F)F)ccn3)C2)cn1	0.995	train
O=C(NC1CCCCC1)N1CCC(c2nc(-c3ccc4ccccc4n3)no2)CC1	0.995	train
CN1CCC2(CC1)CNC(=O)c1cc(-c3ccnc(NC(=O)c4ccc5ccccc5c4)c3)[nH]c12	0.995	train
Nc1c(CC(=O)O)cccc1C(=O)c1ccc(Br)cc1	0.995	train
NC(Cc1cc(I)c(Oc2cc(I)c(O)c(I)c2)c(I)c1)C(=O)O	0.995	train
C=CC1=C(C)/C(=C/c2[nH]c(Cc3[nH]c(/C=C4\NC(=O)C(C)=C4C=C)c(C)c3CCC(=O)O)c(CCC(=O)O)c2C)NC1=O	0.995	train
CS(=O)(=O)c1ccc(-n2cc(Cl)c(OC3CCN(c4ncc(Cl)cn4)CC3)cc2=O)c(F)c1	0.995	train
Cn1c2c(c(=O)n(C)c1=O)C(C(F)(F)F)(C(F)(F)F)N=C(c1cccc([N+](=O)[O-])c1)N2	0.995	train
COc1c(-c2ccc3cc(NS(C)(=O)=O)ccc3c2)cc(-n2ccc(=O)[nH]c2=O)cc1C(C)(C)C	0.995	train
Cc1cc(NC(=O)c2cnn3ccc(N)nc23)n(-c2cccc(Cl)c2)n1	0.995	train
CC(C(=O)NS(C)(=O)=O)c1ccc(OS(=O)(=O)C(F)(F)F)cc1	0.995	train
CC(C)CN1[C@H](C)Cc2c([nH]c3ccccc23)[C@H]1c1ccc(/C=C/C(=O)O)cc1	0.9949	train
N#Cc1cc(S(=O)(=O)Nc2ncns2)ccc1Oc1ccc(C(F)(F)F)cc1-c1ccnnc1	0.99457	train
CC[C@H]1C[C@@H](N(Cc2cc(C(F)(F)F)cc(C(F)(F)F)c2)c2ncc(-c3cnn(C)c3)cn2)C[C@@H](CC)N1C(=O)O[C@H]1CC[C@H](C(=O)O)CC1	0.994	train
COc1cc(-c2cccc(C(F)(F)F)c2)ccc1-n1c(=O)ccc2cc(S(=O)(=O)Nc3ncccn3)ccc21	0.994	train
COc1ccc(-c2csc(NC(=O)[C@H]3CCCCN3S(=O)(=O)c3ccc(C)cc3)n2)cc1	0.994	train
[O-][n+]1ccc(Cl)cc1C1OC2(CCN(Cc3ccc(OC(F)(F)F)cc3)CC2)c2ccccc21	0.994	train
CSc1cn2c(-c3cn[nH]c3)cnc2c(Nc2cc(C)ns2)n1	0.994	train
c1ccc(Nc2nc3c(s2)CCCc2n[nH]cc2-3)nc1	0.994	train
CCc1ccc(Cc2cc([C@@H]3S[C@H](CO)[C@@H](O)[C@H](O)[C@H]3O)c(OC)cc2Cl)cc1	0.994	train
Cc1c(-c2ccc(N3CCCCCC3)cc2)[nH]c2cc(F)cc(F)c2c1=O	0.994	train
Cc1cnc(NC(O)=C2C(=O)c3ccccc3S(=O)(=O)N2C)s1	0.994	train
COc1cc(N2C(=O)N(c3ccc(-c4ccc(C(=O)O)cc4)cc3)C(=O)C23CCN(Cc2ncccc2C)CC3)ncn1	0.994	train
Clc1ccc2c(CN3CCO[C@H](COc4ccccc4)C3)c[nH]c2c1	0.994	train
O=C1OC(c2ccccc2)CC(O)=C1Oc1ccccc1Cl	0.994	train
COc1nn2cc(-c3ccc(C(F)(F)F)cc3)nc2s1	0.994	train
COc1nn2cc(-c3ccc(OC(F)(F)F)cc3)nc2s1	0.994	train
Cc1cc([C@@]23c4ccccc4C(=O)N2CCN3C(=O)c2ccc(F)c(F)c2)ccc1Cl	0.994	train
COc1cc(-c2cccc(OC(F)F)c2)c(F)cc1-n1c(=O)ccc2cc(S(=O)(=O)Nc3ccon3)ccc21	0.994	train
COc1ccc(-c2c(C)nn3c(C(F)(F)F)cc(C)nc23)cc1	0.994	train
Cc1noc2c1-c1sc(C)c(C)c1C(c1ccc(Cl)cc1)=N[C@H]2CC(N)=O	0.994	train
COc1nn2cc(-c3ccc(Cl)cc3)nc2s1	0.994	train
Fc1cc(CN2CCO[C@H](COc3ccccc3)C2)ccc1Cl	0.994	train
C[C@H](CO)Nc1cc(NS(=O)(=O)N2CCCC2)nc(SCc2cccc(F)c2F)n1	0.994	train
C[C@@H]1CN(c2nc(C(F)(F)F)no2)CCN1c1ncc(OCc2ccc(CS(C)(=O)=O)cc2F)cn1	0.994	train
Cn1c(CO)c(-c2ccccc2)c2cc([N+](=O)[O-])ccc21	0.994	train
Cc1nc(C)c(-c2ccc(C34CCC(C(=O)O)(CC3)CC4)cc2)nc1C(N)=O	0.994	train
Cn1cc(NC(=O)c2cnn3cccnc23)c(-c2cccc(Cl)c2)n1	0.994	train
COC(=O)C(O/N=C(\C(=O)N[C@@H]1C(=O)N(OS(=O)(=O)O)C1(C)C)c1csc(N)n1)c1cc(=O)c(O)cn1O	0.9939	train
O=C(O)Cc1ccccc1Nc1c(Cl)cccc1Cl	0.993833	train
O=C(Nc1ccc(N2C(=O)CC3(CCCCC3)C2=O)c(Cl)c1)c1ccccn1	0.9938	train
CCCCc1nc(Cl)c(CO)n1Cc1ccc(-c2ccccc2-c2nn[nH]n2)cc1	0.9935	train
COc1c(C)c2c(c(O)c1C/C=C(\C)CCC(=O)O)C(=O)OC2	0.9935	train
COCC(O/N=C(\C(=O)N[C@@H]1C(=O)N(OS(=O)(=O)O)C1(C)C)c1csc(N)n1)c1cc(=O)c(O)cn1O	0.9933	train
CC(C)c1nnc(NC(=O)NC23CC4CC(CC(C4)C2)C3)o1	0.993	train
Cc1csc(NC(=O)NC2C3CC4CC(C3)CC2C4)n1	0.993	train
CCCN(CCC)C(=O)Cc1c(-c2ccc(OC)cc2)nn2c(CC)cc(CC)nc12	0.993	train
Cc1c(Cc2ccccc2S(=O)(=O)c2ccccc2)c(-c2ccccc2)nn1CC(=O)O	0.993	train
COc1ccc(OC)c(CN(C(=O)C[18F])c2ccccc2Oc2ccccc2)c1	0.993	train
Cc1c(-c2ccc(N3CCC[C@H](C)C3)cc2)[nH]c2cc(F)cc(F)c2c1=O	0.993	train
CC[C@@H](c1ccccc1)c1c(O)c2ccccc2oc1=O	0.993	train
Cc1cccc(-c2noc(C3CC(=O)N(c4ccc(F)cc4)C3)n2)c1	0.993	train
Cc1nc(C)c(-c2ccc(-c3ccc([C@H](C)C(=O)O)cc3Cl)c(F)c2)nc1C(N)=O	0.993	train
CC(C)(CCCCCC(O)CCCCCC(C)(C)C(=O)O)C(=O)O	0.993	train
CC(C)Oc1ccc(-c2nc(-c3cccc4c3CC[C@H]4O)no2)cc1C#N	0.993	train
O=C([C@H]1CC2CCC1C2)N1CC(c2nc(-c3cccc(F)c3)no2)C1	0.993	train
CC(C)(C)c1ccccc1Oc1ncccc1NC(=O)Nc1ccc(OC(F)(F)F)cc1	0.993	train
CC(C)(C)NC(=O)c1c[nH]c2ncc(-c3nn(CCC(O)CO)c4ccc(OC(F)F)cc34)nc12	0.993	train
Cn1c2c(c(=O)n(C)c1=O)C(C(F)(F)F)(C(F)(F)F)NC(c1ccc(Cl)cc1)=N2	0.993	train
CC(C)Oc1ccc(-c2nc(-c3cccc4c3CC[C@@H]4O)no2)cc1C#N	0.993	train
COc1ccc(-c2ccc(Cn3cc(C(=O)O)c(=O)c4cccc(F)c43)cc2)cn1	0.993	train
Cc1cn([C@H]2CCCN([C@@H](CC(C)C)c3ccc(C(=O)O)c(Oc4cccc(Cl)c4)c3F)C2)c(=O)[nH]c1=O	0.993	train
O[C@H](c1ccccn1)C1(c2ccc(Cl)c(Cl)c2)CCC1	0.993	train
Nc1ncnc2c1C(=O)N(c1ccc(-c3ccc(Cl)cc3Cl)cc1)CCO2	0.993	train
O=C(/C=C/c1cccnc1)NCCCCC1CCN(C(=O)c2ccccc2)CC1	0.993	train
CCCCc1cc(C(=O)N[C@@H](CCC(=O)O)C(=O)N2CCN(C(=O)OCC)CC2)nc(-c2ccccc2)n1	0.993	train
CS(=O)(=O)c1cc(Cl)c(NC(=O)N2CCN3C(=O)N([C@H]4C[C@@H]4c4ccccc4)C(=O)[C@@H]3C2)c(Cl)c1	0.993	train
Nc1cccnc1C(=O)Nc1ccc(N2C(=O)c3ccccc3C2=O)c(Cl)c1	0.993	train
Cc1ccc(C(=O)Nc2ccc(CN3CCN(C)CC3)c(C(F)(F)F)c2)cc1C#Cc1cnc2cccnn12	0.992667	train
CC(=O)NCCOC(=O)C(Oc1cccc(C(F)(F)F)c1)c1ccc(Cl)cc1	0.9925	train
O=C(O)Cc1sc(-c2ccccc2)nc1-c1ccc(Cl)cc1	0.9925	train
CC(C(=O)O)c1ccc(-c2ccccc2)c(F)c1	0.9925	train
O=C1c2ccccc2C(=O)C1c1ccc(F)cc1	0.9925	train
COc1ccc(NC(=O)/C=C/CN(C)C)cc1Nc1ncc(Cl)c(-c2cnn3ccccc23)n1	0.992	train
C[C@@](C(=O)O[C@H]1C[N+]2(CCOc3ccc(Cl)cc3)CCC1CC2)(c1ccccc1)N1CCCCC1	0.992	train
C[C@@](C(=O)O[C@H]1C[N+]2(CCc3ccccc3F)CCC1CC2)(c1ccccc1)N1CCCCC1	0.992	train
O=C1OC(c2ccccc2)CC(O)=C1Sc1ccccc1Cl	0.992	train
O=C(c1ccc(F)c(F)c1)N1CCN2C(=O)c3ccccc3C12C1CCCCC1	0.992	train
O=C1c2cc(COc3ccccc3)nn2CCC1c1ccc(F)cc1	0.992	train
c1ccc(Nc2nc3c(s2)CCc2n[nH]cc2-3)nc1	0.992	train
C[C@@](C(=O)O[C@H]1C[N+]2(CC(=O)Nc3cccc(F)c3)CCC1CC2)(c1cccs1)N1CCCCC1	0.992	train
Cc1nc(-c2ccc(OCC(C)C)c(C#N)c2)sc1C(=O)O	0.992	train
O=C(C(=O)N1CCN(C(=O)c2ccccc2)CC1)c1c[nH]c2c(-c3cnco3)ncc(F)c12	0.992	train
O=C(O)c1cn(Cc2ccc(-c3ccccc3)cc2)c2ncccc2c1=O	0.992	train
Cc1nc(C)c(-c2ccc(-c3ccc([C@H](C)C(=O)O)cc3Cl)cc2)nc1C(N)=O	0.992	train
Cn1c(=O)c2ccc(-c3cncnc3)cc2n2nc(-c3ccccc3)cc12	0.992	train
COc1ccc(-c2c(C)nn3c(C(F)(F)F)cc(C)nc23)c(F)c1F	0.992	train
C[C@@H](CO)NC(=O)c1c[nH]c2ncc(-c3nn(C)c4cc(Cl)ccc34)nc12	0.992	train
CC1C(NC(=O)Nc2ccc(F)c(F)c2F)CC2CC1C2(C)C	0.992	train
COc1ccc(C2(C#N)CCC(C(=O)O)CC2)cc1OC1CCCC1	0.992	train
O=C(NCc1ccc(F)cc1)c1ncc2cccnc2c1O	0.992	train
CC(=O)CC(c1ccccc1)c1c(O)c2ccccc2oc1=O	0.9919	train
N#Cc1cc(S(=O)(=O)Nc2ccc(F)cn2)ccc1Oc1ccc(CO)c(Cl)c1	0.9917	train
CN1C(C(=O)Nc2ccccn2)=C(O)c2ccccc2S1(=O)=O	0.9915	train
O=C(c1ccccc1)c1ccc2n1CCC2C(=O)O	0.991333	train
COc1cc(-c2cc(OC)c(-n3c(=O)ccc4cc(S(=O)(=O)Nc5ncccn5)ccc43)cc2F)ccc1Cl	0.991	train
COc1cc(C)c(Cc2ccc(C(C)C)cc2)cc1[C@@H]1S[C@H](CO)[C@@H](O)[C@H](O)[C@H]1O	0.991	train
COc1cc(-c2cn([C@H]3CCc4c(F)cccc4N(CC(F)(F)F)C3=O)nn2)ccc1-n1cnc(C)c1	0.991	train
COc1ccc(-c2cnc3c(-c4cccc5ncccc45)cnn3c2)cc1	0.991	train
Cc1nc(C)c(-c2ccc([C@H]3CC[C@H](Cc4nnn[nH]4)CC3)cc2)nc1C(N)=O	0.991	train
COc1c(-c2cn([C@H]3CCc4c(F)cccc4N(CC(F)(F)F)C3=O)nn2)ccc(-n2cnc(C)c2)c1F	0.991	train
COCCNc1nonc1/C(=N/O)Nc1ccc(F)c(Br)c1	0.991	train
Cc1c(-c2ccc(N3CC[C@@H](F)C3)cc2)[nH]c2cc(F)cc(F)c2c1=O	0.991	train
Cc1ccoc1C(=O)Nc1ccc(N2C(=O)c3cccc(C)c3C2=O)cc1F	0.991	train
CCn1c(C(=O)N(C2CC2)C2CC2)cc2c3c(ncn3C)c(Nc3nc(C)c(C)s3)nc21	0.991	train
Fc1ccc2c(CN3CCO[C@H](COc4cccc(F)n4)C3)c[nH]c2c1	0.991	train
O=C(O)c1cn(Cc2ccc(-c3ccc(F)cc3)nc2)c2c(F)cccc2c1=O	0.991	train
COc1ccc2c(Oc3ccc(CC(=O)Nc4cn(C)nc4C)c(OC)c3)ccnc2c1.O=S(=O)(O)O	0.991	train
O=C(Nc1nccs1)NC12CC3CC(CC(C3)C1)C2	0.991	train
CC(C)(C)c1ccc(S(=O)(=O)Nc2ccc(Cl)cc2C(=O)c2cc[n+]([O-])cc2)cc1	0.991	train
COc1ccc(Cn2cc(C(=O)O)c(=O)c3ccccc32)cc1	0.991	train
Cc1cc(C)c2cc(C(=O)NC3CN(c4ccnc(F)c4F)C3)ccc2n1	0.991	train
C[C@@H]1CCO[C@H]2Cn3cc(C(=O)NCc4ccc(F)cc4F)c(=O)c(O)c3C(=O)N21	0.991	train
COc1ccccc1Oc1c(NS(=O)(=O)c2ccc(C(C)C)cn2)nc(-c2ccnc(-c3nn[nH]n3)c2)nc1OCCO	0.99075	train
COc1ccc(Nc2nc(-c3cccc(C(=O)Nc4ccc(C(=O)O)cc4)c3)nc3scnc23)cc1OC	0.9906	train
O=c1c(O)c(-c2ccc(O)c(O)c2)oc2cc(O)cc(O)c12	0.9905	train
CC(C)(C)NC(=O)c1c[nH]c2ncc(-c3nn(C4CCNCC4)c4cc(F)ccc34)nc12	0.9905	train
CCc1nn(CCCN2CCN(c3cccc(Cl)c3)CC2)c(=O)n1CCOc1ccccc1	0.990333	train
CCCCCCCCCCC[C@@H](C[C@@H]1OC(=O)[C@H]1CCCCCC)OC(=O)[C@H](CC(C)C)NC=O	0.99	train
CCCCCCCCCCCC(CC1OC(=O)C1CCCCCC)OC(=O)C(CC(C)C)NC=O	0.99	train
CCc1nc(Cl)c2n1CCN([C@@H](C(=O)NC)c1ccccc1)[C@H]2CCc1ccc(C(F)(F)F)cc1	0.99	train
CNC(=O)[C@@H](c1ccccc1)N1CCn2c(C3CC3)nc(Cl)c2[C@@H]1CCc1ccc(C(F)(F)F)cc1	0.99	train
CCC(=C(c1ccccc1)c1ccc(OCCN(C)C)cc1)c1ccccc1	0.99	train
CCCCCn1cc(C(=O)NC23CC4CC(CC(C4)C2)C3)c(=O)cc1C(C)(C)C	0.99	train
CNC(=O)c1ccccc1Sc1ccc2c(C=Cc3ccccn3)n[nH]c2c1	0.99	train
C[C@]12CC[C@@H]3c4ccc(O)cc4C[C@@H](CCCCCCCCCS(=O)CCCC(F)(F)C(F)(F)F)[C@H]3[C@@H]1CC[C@@H]2O	0.99	train
CCCNS(=O)(=O)Nc1ncnc(OCCOc2ncc(Br)cn2)c1-c1ccc(Br)cc1	0.99	train
Cc1cccc(Cl)c1NC(=O)c1cnc(Nc2cccc(NCCCn3ccnc3)n2)s1	0.99	train
CCCn1nc(NC(=O)NC23CC4CC(CC(C4)C2)C3)cc1C	0.99	train
CC12CCC3c4ccc(O)cc4CC(CCCCCCCCCS(=O)CCCC(F)(F)C(F)(F)F)C3C1CCC2O	0.99	train
COCC(=O)OC1(CCN(C)CCCc2nc3ccccc3[nH]2)CCc2cc(F)ccc2C1C(C)C	0.99	train
CCC=CCC=CCC=CCC=CCC=CCCCC(=O)O	0.99	train
CCOc1cc2ncc(C#N)c(Nc3ccc(OCc4ccccn4)c(Cl)c3)c2cc1NC(=O)C=CCN(C)C	0.99	train
Cn1nc(-c2ccc(F)cc2)cc1C1(c2ccccn2)CCN(CCc2ccccc2)CC1	0.99	train
CN(CC=CC#CC(C)(C)C)Cc1cccc2ccccc12	0.99	train
CC(C)COC[C@H](CN(Cc1ccccc1)c1ccccc1)N1CCCC1	0.99	train
Cc1c(NC(=O)c2cc3c(s2)CCCC3)cccc1-c1cc(Nc2ccncn2)c(=O)n(C)c1	0.99	train
CN1CCN(c2ccc(C(=O)Nc3n[nH]c4ccc(Cc5cc(F)cc(F)c5)cc34)c(NC3CCOCC3)c2)CC1	0.99	train
Cc1c(-c2cc(Nc3ccncn3)c(=O)n(C)c2)cccc1N1CCc2c(sc3c2CCCC3)C1=O	0.99	train
CCCCCOc1ccc(-c2ccc(-c3ccc(C(=O)N[C@H]4C[C@@H](O)[C@@H](O)NC(=O)[C@@H]5[C@@H](O)[C@@H](C)CN5C(=O)[C@H]([C@@H](C)O)NC(=O)[C@H]([C@H](O)[C@@H](O)c5ccc(O)cc5)NC(=O)[C@@H]5C[C@@H](O)CN5C(=O)[C@H]([C@@H](C)O)NC4=O)cc3)cc2)cc1	0.99	train
CCCCCOc1ccc(-c2ccc(-c3ccc(C(=O)N[C@@H]4C[C@@H](O)[C@@H](O)NC(=O)[C@@H]5[C@@H](O)[C@@H](C)CN5C(=O)[C@H]([C@@H](C)O)NC(=O)[C@H]([C@H](O)[C@@H](O)c5ccc(O)cc5)NC(=O)[C@@H]5C[C@@H](O)CN5C(=O)[C@H]([C@@H](C)O)NC4=O)cc3)cc2)cc1	0.99	train
CS(=O)(=O)CCNCc1ccc(-c2ccc3ncnc(Nc4ccc(OCc5cccc(F)c5)c(Cl)c4)c3c2)o1	0.99	train
CCCSc1nc(N[C@@H]2C[C@H]2c2ccc(F)c(F)c2)c2nnn([C@@H]3C[C@H](O)[C@@H](O)[C@H]3O)c2n1	0.99	train
CCOC(=O)N[C@@H]1CC[C@@H]2[C@@H](C1)C[C@H]1C(=O)O[C@H](C)[C@H]1[C@H]2C=Cc1ccc(-c2cccc(F)c2)cn1	0.99	train
CC(=O)CC(c1ccc([N+](=O)[O-])cc1)c1c(O)oc2ccccc2c1=O	0.99	train
C[C@H](Nc1ncc(Br)c(Nc2cc(C3CC3)[nH]n2)n1)c1ccc(F)cc1	0.99	train
CC1(C)CCSc2ccc(C#Cc3ccc(C(=O)O)cn3)cc21	0.99	train
O=C(O)CCNC(=O)c1ccc(/N=N/c2ccc(O)c(C(=O)O)c2)cc1	0.99	train
Cc1c(C)c2c(c(C)c1O)CC[C@@](C)(COc1ccc(C[C@H]3SC(=O)NC3=O)cc1)O2	0.99	train
C[C@@H]1CN(c2nc(C(F)(F)F)no2)CCN1c1ncc(OCc2ccncc2C#N)cn1	0.99	train
OCCOc1ccc(C(=C(CCCl)c2ccccc2)c2ccccc2)cc1	0.99	train
O=c1c(Cc2c(O)oc3ccccc3c2=O)c(O)oc2ccccc12	0.99	train
Oc1ccc2ccc(OCCCCN3CCN(c4cccc5sccc45)CC3)cc2n1	0.99	train
O=C(O)COc1ccc(C(=O)c2cccs2)c(Cl)c1Cl	0.99	train
C[C@@](C(=O)O[C@H]1C[N+]2(CCc3ccccc3)CCC1CC2)(c1cccs1)N1CCCCC1	0.99	train
CCCSc1nc(N[C@@H]2C[C@H]2c2ccc(F)c(F)c2)c2nnn([C@@H]3C[C@H](OCCO)[C@@H](O)[C@H]3O)c2n1	0.99	train
CCC1=C(C)CN(C(=O)NCCc2ccc(S(=O)(=O)NC(=O)NC3CCC(C)CC3)cc2)C1=O	0.99	train
CCOc1nc2cccc(C(=O)O)c2n1Cc1ccc(-c2ccccc2-c2nnn[nH]2)cc1	0.99	train
C=C(c1ccc(C(=O)O)cc1)c1cc2c(cc1C)C(C)(C)CCC2(C)C	0.99	train
C[C@@H](c1nc(-c2ccc(C#N)cc2)cs1)[C@](O)(Cn1cncn1)c1cc(F)ccc1F	0.99	train
COCc1c(C(C)C)nc(C(C)C)c(C=C[C@@H](O)C[C@@H](O)CC(=O)O)c1-c1ccc(F)cc1	0.99	train
N#Cc1ccc(NC(=O)NC2C3CC4CC(C3)CC2C4)cc1	0.99	train
O=c1cc(-c2ccc(O)cc2)oc2cc(O)cc(O)c12	0.99	train
Oc1nc2ccccc2n1C1CCN(CCCC(c2ccc(F)cc2)c2ccc(F)cc2)CC1	0.99	train
CC1(C(=O)O)CCC2(C)CCC3(C)C(=CC(=O)C4C5(C)CCC(OC(=O)CCC(=O)O)C(C)(C)C5CCC43C)C2C1	0.99	train
O=C(Nc1ncc([N+](=O)[O-])s1)c1ccccc1O	0.99	train
O=C(O)C1CC(C2CCCCC2)CN1C(=O)CP(=O)(O)CCCCc1ccccc1	0.99	train
O=[N+]([O-])c1ccc2c(c1)CCN2c1ccc(O[C@H]2O[C@H](CO)[C@@H](O)[C@H](O)[C@@H]2O)c(Cl)c1	0.99	train
COC(c1ccccc1)(c1ccccc1)[C@H](Oc1nc(C)cc(C)n1)C(=O)O	0.99	train
O=C(Nc1n[nH]c2ccc(Cc3cc(F)cc(F)c3)cc12)c1ccc(N2CCNCC2)cc1NC1CCOCC1	0.99	train
COC(=O)C1=C(C)NC(C)=C(C(=O)OCC(C)C)[C@@H]1c1ccccc1[N+](=O)[O-]	0.99	train
CC(=O)CC(c1ccccc1)c1c(O)oc2ccccc2c1=O	0.99	train
Cn1cc2c(-c3cc(F)c(Cn4c(=O)cnc5ccccc54)c(F)c3)cccc2n1	0.99	train
CC(C)(O)c1ccccc1CC[C@@H](SCC1(CC(=O)O)CC1)c1cccc(C=Cc2ccc3ccc(Cl)cc3n2)c1	0.99	train
NS(=O)(=O)Nc1ncnc(OCCOc2ncc(Br)cn2)c1-c1ccc(Br)cc1	0.99	train
CC(C)(O)c1ccccc1CCC(SCC1(CC(=O)O)CC1)c1cccc(C=Cc2ccc3ccc(Cl)cc3n2)c1	0.99	train
O=C1c2ccc(OCc3cccc(F)c3)nc2CCN1c1ccc(F)cn1	0.99	train
CC(C)(C)c1cc(C(C)(C)C)c(NC(=O)c2c[nH]c3ccccc3c2=O)cc1O	0.99	train
Cc1nn(C)cc1S(=O)(=O)NC(=O)c1ccc(-n2ccc(OCC(C)(C)C(F)(F)F)n2)nc1N1C[C@@H](C)CC1(C)C	0.99	train
O=C1[C@H]2[C@@H]3CC[C@@H](C3)[C@H]2C(=O)N1C[C@@H]1CCCC[C@H]1CN1CCN(c2nsc3ccccc23)CC1	0.99	train
ClC1=C(Cl)C2(Cl)C3C4CC(C5OC45)C3C1(Cl)C2(Cl)Cl	0.99	train
O=C(O)COC(=O)Cc1ccccc1Nc1c(Cl)cccc1Cl	0.99	train
CCCC(=O)Nc1cccc(NCc2ccccc2Br)c1	0.99	train
COC(O)=C1C(C)=NC(C)=C(C(=O)OCCN2CCN(C(c3ccccc3)c3ccccc3)CC2)C1c1cccc([N+](=O)[O-])c1	0.99	train
CCOC(O)=C1C(C)=NC(C)=C(C(=O)OC)C1c1cccc(Cl)c1Cl	0.99	train
CCCS(=O)(=O)Nc1ccc(F)c(C(=O)c2c[nH]c3ncc(-c4ccc(Cl)cc4)cc23)c1F	0.99	train
Cc1ccc(CNC(=O)c2cc(C#CC(C)(C)O)cnc2NCc2ccc3c(c2)OCO3)cc1C(F)F	0.99	train
Nc1c(-c2ccccc2)nn(-c2nc(C(=O)O)cs2)c1-c1ccccc1	0.99	train
Cc1ccc(-n2nccn2)c(C(=O)N2CCN(c3nc4cc(Cl)ccc4o3)CC[C@H]2C)c1	0.99	train
O=C(O)CCc1nc(-c2ccccc2)c(-c2ccccc2)o1	0.99	train
O=C1C=CC=CC1=C1N/C(=C2/C=CC=CC2=O)N(c2ccc(C(=O)O)cc2)N1	0.99	train
Cc1cc(C)c(CNC(=O)c2c(C)n([C@H](C)c3ccccc3)c3ccccc23)c(=O)[nH]1	0.99	train
CCCCC1C(=O)N(c2ccccc2)N(c2ccc(O)cc2)C1=O	0.99	train
CCOc1nc2cccc(C(=O)O)c2n1Cc1ccc(-c2ccccc2-c2noc(=O)[nH]2)cc1	0.99	train
CCC(C)n1c(C)c(C(=O)NCc2c(C)cc(C)nc2O)c2ccccc21	0.99	train
CCOC(=O)C=C(C)C=CC=C(C)C=Cc1c(C)cc(OC)c(C)c1C	0.99	train
CC(C(=O)O)c1ccc(C(=O)c2cccs2)cc1	0.99	train
O=C(NCc1ccc(S(=O)(=O)c2cccc(C(F)(F)F)c2)cc1)c1cc2ccncc2o1	0.99	train
CC(=O)N1CCCc2ccc(NC(=O)c3ccccc3Br)cc21	0.99	train
CCC(c1ccccc1)c1c(O)oc2ccccc2c1=O	0.99	train
N[C@@H](Cc1cc(I)c(Oc2cc(I)c(O)c(I)c2)c(I)c1)C(=O)O	0.99	train
COCc1c(C(C)C)nc(C(C)C)c(C=CC(O)CC(O)CC(=O)O)c1-c1ccc(F)cc1	0.99	train
CC(C)C[C@@H]1C(=O)N[C@H](C2Cc3ccccc3C2)C(=O)N1[C@@H](C(=O)NC(C)C)c1ccc(Br)s1	0.99	train
OC[C@H]1O[C@H](Oc2ccc(N3CCc4ccccc43)cc2Cl)[C@@H](O)[C@@H](O)[C@@H]1O	0.99	train
O=C(O)c1cc(-c2ccc(F)cc2F)ccc1O	0.99	train
C=CC[C@@H]1C=C(C)C[C@H](C)C[C@H](OC)[C@H]2O[C@@](O)(C(=O)C(=O)N3CCCC[C@H]3C(=O)O[C@H](C(C)=C[C@@H]3CC[C@@H](O)[C@H](OC)C3)[C@H](C)[C@@H](O)CC1=O)[C@H](C)C[C@@H]2OC	0.99	train
C[C@@H](C(=O)O)c1ccc(C(=O)c2cccs2)cc1	0.99	train
O=C(O)c1cn(Cc2ccc(-c3cccc4cccnc34)cc2)c2cccc(F)c2c1=O	0.99	train
CC12CCC(O)CC1=CCC1C2CCC2(C)C(c3cccnc3)=CCC12	0.99	train
COC(=O)c1c(C)nc(C)c(C(=O)OCC(C)C)c1-c1ccccc1[N+](=O)[O-]	0.99	train
Cc1ccc(-n2nc(C)c(N=Nc3cccc(-c4cccc(C(=O)O)c4)c3O)c2O)cc1C	0.99	train
CC(C)N(CCCCOCC(N)=O)c1cnc(-c2ccccc2)c(-c2ccccc2)n1	0.99	train
O=C1CCc2ccc(OCCCCN3CCN(c4cccc(Cl)c4Cl)CC3)cc2N1	0.99	train
O=C(O)Cc1ccccc1Oc1ccc(Cl)cc1Cl	0.99	train
CCOC(=O)C1=C(C)NC(C)=C(C(=O)OC)[C@@H]1c1cccc(Cl)c1Cl	0.99	train
Cc1cnc(NC(=O)C2=C(O)c3ccccc3S(=O)(=O)N2C)s1	0.99	train
CCc1oc2ccccc2c1C(=O)c1cc(Br)c(O)c(Br)c1	0.99	train
C[C@H](CO)Nc1cc(C(=O)O)nc(SCc2ccccc2)n1	0.99	train
COc1ccc(C)c2sc(NC(=O)c3ccncc3)nc12	0.99	train
Cc1nc2c([nH]1)-c1ccccc1N(C(=O)c1ccc(NC(=O)c3ccccc3-c3ccccc3)cc1)CC2	0.99	train
Cc1nc2c([nH]1)CCN(C(=O)c1ccc(NC(=O)c3ccccc3-c3ccccc3)cc1)c1ccccc1-2	0.99	train
COc1ccc(CN2CCO[C@H](COc3ccccc3)C2)cc1Cl	0.99	train
Cc1ccc(C2OC(CO)C(O)C(O)C2O)cc1Cc1ccc(-c2ccc(F)cc2)s1	0.99	train
COc1cccc(N2CCN(C3=Nc4c(F)cccc4[C@H](CC(=O)O)N3c3cc(C(F)(F)F)ccc3OC)CC2)c1	0.99	train
CC[C@H](C)[C@H]1O[C@]2(CC[C@@H]1C)C[C@@H]1C[C@@H](CC=C(C)[C@@H](O[C@H]3C[C@H](OC)[C@@H](O[C@H]4C[C@H](OC)[C@@H](O)[C@H](C)O4)[C@H](C)O3)[C@@H](C)C=CC=C3CO[C@@H]4[C@H](O)C(C)=C[C@@H](C(=O)O1)[C@]34O)O2	0.99	train
O=C(Nc1cc(C(F)(F)F)ccc1-n1cncn1)C1(c2ccccc2)CC1	0.99	train
Cc1cnc(NCCc2ccccn2)c(=O)n1CC(=O)NCc1cc(Cl)ccc1OCC(=O)NC1CC1	0.99	train
O=C(O)c1cc(N=Nc2ccc(S(=O)(=O)Nc3ccccn3)cc2)ccc1O	0.99	train
C[C@](O)(CO)CNc1cc(Nc2cccc(-c3ccc(C(F)(F)F)cc3F)c2)nn2c(C(N)=O)cnc12	0.99	train
CC(C(=O)O)c1ccc2c(c1)[nH]c1ccc(Cl)cc12	0.99	train
O=[N+]([O-])c1ccc2c(ccn2-c2ccc(O[C@H]3O[C@H](CO)[C@@H](O)[C@H](O)[C@@H]3O)c(Cl)c2)c1	0.99	train
O=C(O)C[C@H](O)C[C@H](O)C=Cc1c(C2CC2)nc2ccccc2c1-c1ccc(F)cc1	0.99	train
CC(C)(Oc1ccc(C(=O)c2ccc(Cl)cc2)cc1)C(=O)O	0.99	train
COC(=O)NC(C(=O)N1CCCC1c1nc(-c2ccc(-c3ccc(-c4c[nH]c(C5CCCN5C(=O)C(NC(=O)OC)C(C)C)n4)cc3)cc2)c[nH]1)C(C)C	0.99	train
CCc1cccc2c3c([nH]c12)[C@@](CC)(CC(=O)O)OCC3	0.99	train
O=c1[nH]c2c(cc1CNCc1cccc(C(F)(F)F)c1)c(C1CC1)nn2-c1ccccc1	0.99	train
CC(C)OC(=O)C(C)(C)Oc1ccc(C(=O)c2ccc(Cl)cc2)cc1	0.99	train
O=C1Nc2ccc(Cl)cc2C(C#CC2CC2)(C(F)(F)F)O1	0.99	train
CCc1cc2c(cc1N1CCC(N3CCOCC3)CC1)C(C)(C)c1[nH]c3cc(C#N)ccc3c1C2=O	0.99	train
C[C@H](C(=O)O)c1ccc(-c2ccccc2)c(F)c1	0.99	train
COc1ccc(CNc2nc(N3CCC[C@H]3CO)ncc2C(=O)NCc2ncccn2)cc1Cl	0.99	train
CN(C)CCC=C1c2ccccc2Sc2ccc(Cl)cc21	0.99	train
Cc1cccc(Nc2ccncc2S(=O)(=O)NC(=O)NC(C)C)c1	0.99	train
C[C@H](C(=O)O)c1cccc(Oc2ccccc2)c1	0.99	train
CCCc1nc(C(C)(C)O)c(C(=O)O)n1Cc1ccc(-c2ccccc2-c2nn[nH]n2)cc1	0.99	train
O=C1c2ccc(Cl)cc2-n2c1nc1ccccc1c2=O	0.99	train
CC(=O)N1CCN(c2ccc(OC[C@H]3CO[C@](Cn4ccnc4)(c4ccc(Cl)cc4Cl)O3)cc2)CC1	0.99	train
CC[C@@H]1[C@@H]2C[C@H](O)CC[C@]2(C)[C@H]2CC[C@@]3(C)[C@@H](CC[C@@H]3[C@H](C)CCC(=O)O)[C@@H]2[C@@H]1O	0.99	train
CCOC(=O)[C@@H](N)Cc1ccc(-c2cc(O[C@H](c3ccc(Cl)cc3-n3ccc(C)n3)C(F)(F)F)nc(N)n2)cc1	0.99	train
C[C@@H](Oc1cc2oc(=O)n(CCC(=O)O)c2cc1Cl)c1ccc(Cl)cn1	0.99	train
C[C@]12CC[C@H]3[C@@H](CC[C@H]4NC(=O)C=C[C@]34C)[C@@H]1CC[C@@H]2C(=O)Nc1cc(C(F)(F)F)ccc1C(F)(F)F	0.99	train
Cc1ccc(C)c(OCCCC(C)(C)C(=O)O)c1	0.99	train
Oc1c(Cl)c(Cl)c(Cl)c(Cl)c1Cl	0.99	train
CC(=O)[C@H]1CC[C@H]2[C@@H]3CC[C@H]4C[C@H](O)CC[C@]4(C)[C@H]3CC[C@]12C	0.99	train
C[C@H](C(=O)O)c1cccc(C(=O)c2ccccc2)c1	0.99	train
C[C@@H]1C[C@H]2[C@@H]3C[C@H](F)C4=CC(=O)C=C[C@]4(C)[C@@]3(F)[C@@H](O)C[C@]2(C)[C@@]1(OC(=O)c1ccco1)C(=O)SCF	0.99	train
Cc1cn([C@H]2CCCN(S(=O)(=O)c3ccc(O)c(Oc4cccc(Cl)c4)c3)C2)c(=O)[nH]c1=O	0.99	train
CC(=O)Nc1nc(C)c(-c2cc3c(c(NS(C)(=O)=O)c2)C(=O)N([C@@H](C)C2CC2)C3)s1	0.99	train
CC(C)Cc1ccc([C@@H](C)C(=O)O)cc1	0.99	train
C=CCOc1ccc(CC(=O)O)cc1Cl	0.99	train
CC(=O)C1CCC2C3CCC4CC(O)CCC4(C)C3CCC12C	0.99	train
O=C(O)CCCC=CC[C@H]1[C@@H](O)C[C@@H](O)[C@@H]1C=CC(F)(F)COc1ccccc1	0.99	train
Cc1ccc([C@H]2C[C@@H](C(F)(F)F)n3ncc(C(=O)NCc4ccc(F)cn4)c3N2)cc1	0.99	train
O=C(O)CCCc1ccc(N(CCCl)CCCl)cc1	0.99	train
CC(C(=O)O)c1ccc(N2Cc3ccccc3C2=O)cc1	0.99	train
COc1cc([C@@H]2c3cc4c(cc3[C@@H](O[C@@H]3O[C@@H]5CO[C@@H](c6cccs6)O[C@H]5[C@H](O)[C@H]3O)[C@H]3COC(=O)[C@H]23)OCO4)cc(OC)c1O	0.99	train
CC(C)(CO)c1cc2cc(NC(=O)C3(c4ccc5c(c4)OC(F)(F)O5)CC3)c(F)cc2n1C[C@@H](O)CO	0.99	train
NC1CCc2c(Br)ccc(-c3ccccc3)c2CC1=O	0.99	train
COc1ccc(S(=O)(=O)Nc2cc(Cl)cc(Cl)c2O[11CH3])cc1N1CCNCC1	0.99	train
CN1C(=C(O)Nc2ccccn2)C(=O)c2ccccc2S1(=O)=O	0.99	train
Cc1oncc1C(=O)Nc1ccc(C(F)(F)F)cc1	0.99	train
O=C(c1ccccc1)c1ccc2n1CC[C@@H]2C(=O)O	0.99	train
CCc1ccc(CCOc2ccc(C[C@@H]3SC(=O)NC3=O)cc2)nc1	0.99	train
C#CC1(O)C=CC2C3CCC4=CC(=O)CCC4C3CCC21CC	0.99	train
COc1cc2c(cc1OC)[C@H]1C[C@@H](OC(=O)[C@@H](N)C(C)C)[C@H](CC(C)C)CN1CC2	0.99	train
C[C@]12C[C@H](O)[C@H]3[C@@H](CCC4=CC(=O)C=C[C@@]43C)[C@@H]1C[C@H]1O[C@@H](C3CCCCC3)O[C@]12C(=O)CO	0.99	train
CCCc1oc(CCC(=O)O)c(C(=O)O)c1C	0.99	train
C[C@@H](Nc1nc(-c2cccc(C(=O)O)c2)cnc1N)c1ccccc1	0.99	train
COc1ccc2cc(C(C)C(=O)O)ccc2c1	0.99	train
COc1ccc2cc([C@H](C)C(=O)O)ccc2c1	0.99	train
COc1cc(C(=O)/C=C/c2ccc(F)cc2)cc(OC)c1OC	0.99	train
CN(C)c1cccc(-c2ccc(Cn3cc(C(=O)O)c(=O)c4cccc(F)c43)cc2)c1	0.99	train
Cc1ccn(-c2cc(Cl)ccc2[C@@H](Oc2cc(-c3ccc(C[C@H](N)C(=O)O)cc3)nc(N)n2)C(F)(F)F)n1	0.99	train
CC(O)=C(C#N)C(=O)Nc1ccc(C(F)(F)F)cc1	0.99	train
Cn1cc2c(-c3cc(F)c(Cn4cnc5cnccc5c4=O)c(F)c3)cccc2n1	0.99	train
COC(=O)c1ccc2c(ccn2-c2ccc(O[C@H]3O[C@H](CO)[C@@H](O)[C@H](O)[C@@H]3O)c(Cl)c2)c1	0.99	train
CC(C)=CCCC(C)(OC1OC(COC2OC(CO)C(O)C2O)C(O)C(O)C1O)C1CCC2(C)C1C(O)CC1C3(C)CCC(OC4OC(CO)C(O)C(O)C4OC4OC(CO)C(O)C(O)C4O)C(C)(C)C3CCC12C	0.99	train
Cn1ncc(C(=O)N2[C@H]3CC[C@@H]2C[C@H](Nc2cc(=O)n(C)c4ncccc24)C3)c1Cl	0.99	train
CS(=O)(=O)c1ccc(C(=O)Nc2ccc(Cl)c(-c3ccccn3)c2)c(Cl)c1	0.99	train
N#CC(=C1SC[C@@H](c2ccc(Cl)cc2Cl)S1)n1ccnc1	0.99	train
Cc1ccc2c(c1)CCCN2C(=O)SCC(=O)Nc1ccc(S(N)(=O)=O)cc1Cl	0.99	train
CN(C)c1ccc(-c2ccc(Cn3cc(C(=O)O)c(=O)c4cccc(F)c43)nc2)cn1	0.99	train
NC(=O)c1cc(Cl)c2c(Cl)c(C3CC3)n([C@H]3CCCNC3)c2n1	0.99	train
CC(C)(C)[C@@H](O)C=Cc1ccc2c(c1)OCO2	0.99	train
O=C(NCc1c(F)cc(F)cc1F)c1cn2c(c(O)c1=O)C(=O)N1[C@H]3CC[C@H](C3)O[C@@H]1C2	0.99	train
CC1CCOC2Cn3cc(C(=O)NCc4ccc(F)cc4F)c(=O)c(O)c3C(=O)N12	0.99	train
COc1ccc2cc(CCC(C)=O)ccc2c1	0.99	train
O=C(O)C1=CC(=NNc2ccc(O)c(C(=O)O)c2)C=CC1=O	0.99	train
CCCC1C(=O)N2C(N(C)C)=Nc3ccc(C)cc3N2C1=O	0.99	train
COc1cc2nc(N3CCN(C(=O)[C@@H]4CCCO4)CC3)nc(N)c2cc1OC	0.99	train
CC1(C)Oc2ncnc(N)c2N=C1c1ccc(C23CCC(CC(=O)O)(CC2)CC3)cc1	0.99	train
CN[C@@H](C)C(=O)N[C@H](C(=O)N1CSC[C@H]1C(=O)N[C@H]1c2ccccc2C[C@H]1OCC#CC#CCO[C@@H]1Cc2ccccc2[C@@H]1NC(=O)[C@@H]1CSCN1C(=O)[C@@H](NC(=O)[C@H](C)NC)C1CCCCC1)C1CCCCC1	0.989	train
CCCn1nc(NC(=O)NC2C3CC4CC(C3)CC2C4)cc1C	0.989	train
CN1CCN(CCN(C)C2COc3ccccc3-c3c(C4CCCCC4)c4ccc(C(=O)O)cc4n3C2)CC1	0.989	train
COc1ccc(Cl)cc1C(=O)NCCc1ccc(S(=O)(=O)NC(=O)NC2CCCCC2)cc1	0.989	train
CCc1cc(CC)n2nc(-c3ccc(OC)cc3)c(CC(=O)N(C)c3ccccc3)c2n1	0.989	train
Cc1ccc(CC[N+]23CCC(CC2)[C@@H](OC(=O)[C@](C)(c2ccccc2)N2CCCCC2)C3)s1	0.989	train
O=C(C1CC(F)(F)C1)N1CCc2nc(C#Cc3ccccc3)sc2C1	0.989	train
O=C1CC(c2ccccc2)CC(O)=C1Oc1ccccc1Cl	0.989	train
Cc1ccc(-c2ccccn2)cc1NC(=O)c1ccc(OCc2ccccn2)cc1	0.989	train
COc1ccc2c(c1)CCN(C(=O)C1CCN(c3c(C#N)cnc4ccc(F)cc34)CC1)C2	0.989	train
COc1cc(CN2CCO[C@H](COc3cccc(F)c3)C2)ccc1Cl	0.989	train
CCc1cc(CC)n2nc(-c3ccc(OC)cc3)c(CC(=O)N(CC)CC)c2n1	0.989	train
COc1cc(C(=O)Nc2ccc(NC(=O)c3ccccc3)cc2)c(N)cc1O	0.989	train
CN1CC(Cn2nc(-c3cnc4[nH]cc(C(=O)NC(C)(C)C)c4n3)c3cc(OC(F)F)ccc32)C1	0.989	train
C[C@H](NC(=O)c1c(N)nn2cccnc12)c1cc2cccc(C#Cc3cnn(C)c3)c2c(=O)n1-c1ccccc1	0.989	train
CCN1CC(c2nc(C(=O)NCc3ccc(F)cc3)c(O)c3ncccc23)CC1=O	0.989	train
CC[C@@H](c1ccc(C(=O)O)c(Oc2cccc(Cl)c2)c1F)N1CCC[C@H](n2cc(C)c(=O)[nH]c2=O)C1	0.989	train
CNC(=O)c1ccc(F)c2c(C(=O)C(=O)N3CCN(C(=O)c4ccccc4)CC3)c[nH]c12	0.989	train
O=C1c2cc(C(=O)N3CCCCC3)ccc2-n2c1nc1ccccc1c2=O	0.989	train
Cn1cc(NC(=O)c2cnn3ccc(N)nc23)c(-c2cccc(Cl)c2)n1	0.989	train
COc1cc2c(Nc3ccc(NC(=O)c4ccccc4)cc3)nc(NCCCn3ccnc3)nc2cc1O	0.988	train
C=C[C@@H]1C[C@]1(NC(=O)[C@@H]1C[C@@H]2CN1C(=O)[C@H](C(C)(C)C)NC(=O)O[C@@H]1C[C@H]1CCCCCc1nc3ccc(OC)cc3nc1O2)C(=O)NS(=O)(=O)C1CC1	0.988	train
COc1cc(-c2cnc3[nH]cc(-c4ccc(N)nc4)c3c2)cc(OC)c1OC	0.988	train
O=C(Nc1ccc(F)c(F)c1F)NC1C2CC3CC(C2)CC1C3	0.988	train
C[C@H](c1ccc(F)cc1)N(Cc1cccc(C(=O)O)c1)C(=O)c1cnc2ccccc2c1	0.988	train
CNC(=O)c1cnc(N)c2cc(-c3ccc(S(=O)(=O)NC(C)(C)C)cc3)sc12	0.988	train
COc1ccc2c(=O)c(Cl)c(-c3ccc(N4CCCCC4)cc3)[nH]c2c1	0.988	train
O=C(COc1cccc(Cl)c1)NC1CCN(Cc2ccn(-c3ccc(C(F)(F)F)cc3)c2)CC1	0.988	train
Cc1ccc(-c2ncc(C(F)(F)F)[nH]2)cc1NC(=O)c1ccc(OCc2ccccn2)cc1	0.988	train
Cc1cccc2nc(C(=O)N[C@H]3CC[C@@H](NC(=O)c4cc(F)cnc4Oc4cccc(-c5ccc(CN6C[C@H](C)N[C@H](C)C6)cc5)c4)CC3)cn12	0.988	train
Clc1ccc(CN2CCO[C@H](CCc3ccccc3)C2)cc1	0.988	train
O=C(NCc1ccc(S(=O)(=O)c2ccc(N3CCOCC3)nc2)cc1)c1ccc2nccn2c1	0.988	train
O=C(COc1c(Cl)cc(Cl)cc1Cl)N/N=C/c1ccc[nH]1	0.988	train
CC(C)(C)NC(=O)c1c[nH]c2ncc(-c3nn(CCC(O)CO)c4cc(F)ccc34)nc12	0.988	train
C[C@]12CC[C@@H]3[C@H]4CC[C@@](C)(O)C[C@H]4CC[C@H]3[C@@H]1CC[C@@H]2C(=O)Cn1cc(C#N)cn1	0.988	train
Nc1ncnc2c1C(=O)N(c1ccc(-c3cccc(Cl)c3Cl)cc1)CCO2	0.988	train
Cc1ccc(-c2ccc(N3CCOc4ncnc(N)c4C3=O)cc2)c(Cl)c1	0.988	train
COCCOc1cnc2ccc([C@H](C)n3nnc4ccn(-c5cc(C)ns5)c(=O)c43)cc2c1	0.988	train
CN1CC(c2nc(C(=O)NCc3ccc(F)cc3)c(O)c3ncccc23)CC1=O	0.988	train
Cn1cc(-c2cc3c(N4CCN(c5ncc([C@@](C)(N)c6ccc(F)cc6)cn5)CC4)ncnn3c2)cn1	0.988	train
Cc1ccn(-c2ccc(Cn3cc(C(=O)O)c(=O)c4cccnc43)cc2)n1	0.988	train
Cc1cc(Oc2cncc(F)c2)cc(C(=O)Nc2ccc(F)cn2)n1	0.987667	train
CCCCC1C(=O)N(c2ccccc2)N(c2ccccc2)C1=O	0.9875	train
Cc1cc(CC(=O)O)n(C)c1C(=O)c1ccc(Cl)cc1	0.9875	train
C[C@@H](NC1=CC(=O)CCC1)c1ccc(Nc2ncc3cc(-c4ccncc4)ccc3n2)cc1	0.987	train
O=C(Nc1nnc(C2CCC2)o1)NC1C2CC3CC(C2)CC1C3	0.987	train
COc1cc(N2C(=O)N(c3ccc(-c4ccc(C(=O)O)cc4C)nc3)C(=O)C23CCN(Cc2ncccc2C)CC3)ncn1	0.987	train
CC1=C(C(N)=O)C(c2ccc(C(C)C)cc2)n2nc(SCc3ccccc3)nc2N1	0.987	train
O=C(O)c1cn(Cc2ccc(-c3ccccc3)cc2)c2ccsc2c1=O	0.987	train
O=C(c1ccc(F)c(F)c1)N1CCN2C(=O)c3ccccc3[C@@]12c1ccc(Cl)cc1	0.987	train
COc1ccc([C@]23c4ccccc4C(=O)N2CCN3C(=O)c2cc(F)c(F)c(F)c2)cc1C	0.987	train
O=C(C1CCC(F)(F)CC1)N1CC(c2nc(-c3cccc(Cl)c3)no2)C1	0.987	train
COc1ccc(-c2c(C)nn3c(C(F)(F)F)cc(C)nc23)cc1F	0.987	train
CNc1ccc(-c2ccc(Cn3cc(C(=O)O)c(=O)c4cccc(F)c43)cc2)cn1	0.987	train
CCc1cc(CC)n2nc(-c3ccc(OC)cc3)c(CC(=O)N(C)C(C)(C)C)c2n1	0.987	train
Cc1ccc(O)c(C(=O)N[C@H]2CC[C@@H](NC(=O)c3cc(F)cnc3Oc3cccc(-c4ccc(CN5C[C@H](C)N[C@H](C)C5)cc4CN4CCOCC4)c3)CC2)c1	0.987	train
O=C1C2=Nc3ccccc3CN2c2ccc(Cl)cc21	0.987	train
Cc1cn([C@H]2CCCN([C@H](CC(C)C)c3ccc(C(=O)O)c(Oc4cccc(Cl)c4)c3F)C2)c(=O)[nH]c1=O	0.987	train
C[C@@](CCc1cc(-c2ccccc2)no1)(C(=O)NO)S(C)(=O)=O	0.987	train
O=C(Nc1cc(-c2cc3c([nH]2)C2(CCCNC2)CNC3=O)ccn1)c1cccc(OC(F)(F)F)c1	0.987	train
CN(C)c1cccc(-c2ccc(Cn3cc(C(=O)O)c(=O)c4cccc(F)c43)nc2)c1	0.987	train
O=C(Nc1c(Cl)cncc1Cl)c1ccc(OC(F)F)c(OCC2CC2)c1	0.986667	train
Cc1csc(NC(=O)c2cc(C(F)(F)c3cncnc3)cc3cccnc23)n1	0.986	train
CC(C)(C)OC(=O)NC[C@H]1CC[C@H](CNC(=O)c2cc(-c3cccc(CN)c3)nc3ccccc23)CC1	0.986	train
COCCC(=O)NC(C)c1ccc(Nc2ncc3cc(-c4ccncc4)ccc3n2)cc1	0.986	train
O=C(Nc1nc(C(F)(F)F)co1)C1c2ccccc2Oc2ccccc21	0.986	train
CCC(C)n1ncn(-c2ccc(N3CCN(c4ccc(OCC5COC(Cn6cncn6)(c6ccc(Cl)cc6Cl)O5)cc4)CC3)cc2)c1=O	0.986	train
Cc1nc(C#Cc2ccnc(Cl)c2)c(C)n1-c1ccc(F)cc1	0.986	train
O=C1c2ccc(COc3cccc(F)c3)nc2CCN1c1ccc(F)cc1	0.986	train
Cc1oc(-c2ccccc2)nc1COc1ccc(CCC(=O)O)cc1	0.986	train
COC(=O)N[C@H](C(=O)N1C[C@@H](C)C[C@H]1c1nc(-c2ccc(-c3ccc(-c4ccc5[nH]c([C@@H]6C[C@H](C)CN6C(=O)[C@@H](NC(=O)OC)C(C)C)nc5c4)cc3)cc2)c[nH]1)C(C)C	0.986	train
C[C@@](C(=O)O[C@H]1C[N+]2(CC(=O)Nc3ccccc3)CCC1CC2)(c1ccccc1)N1CCCCC1	0.986	train
Cc1cc(Oc2cncc(Cl)c2)cc(C(=O)Nc2ccc(F)cn2)n1	0.986	train
CS(=O)(=O)c1ccc(F)cc1C(=O)N1CCC(N(C2CC2)S(=O)(=O)c2cccc(C(F)(F)F)c2)CC1	0.986	train
C[C@H](N[S@]1(=O)=NC(=O)c2ccccc21)c1ccccc1	0.986	train
NC(=O)c1cnc(N[C@@H]2CCCC[C@@H]2N)nc1Nc1cccc(-n2nccn2)c1	0.986	train
Cc1cnc(C(=O)NCCc2ccc(S(=O)(=O)NC(=O)NC3CCCCC3)cc2)cn1	0.985333	train
N#CC1(NC(=O)[C@H](Cc2ccc(OC(F)(F)F)c(Cl)c2)NC(=O)c2cnn(-c3ccc(F)nc3)n2)CC1	0.9852	train
Cc1cccc(C)c1OCC(=O)N[C@@H](Cc1ccccc1)[C@@H](O)C[C@H](Cc1ccccc1)NC(=O)[C@H](C(C)C)N1CCCNC1=O	0.985	train
COCCC(=O)N[C@H](C)c1ccc(Nc2ncc3cc(-c4ccncc4)ccc3n2)cc1	0.985	train
CC(C)c1nc(CN(C)C(=O)N[C@H](C(=O)N[C@@H](Cc2ccccc2)C[C@H](O)[C@H](Cc2ccccc2)NC(=O)OCc2cncs2)C(C)C)cs1	0.985	train
CCN[C@@H]1CCC=C(c2ccc(F)cc2)[C@H]1COc1cc(F)c(S(=O)(=O)Nc2cscn2)cc1Cl	0.985	train
Cc1ccc(OCC[N+]23CCC(CC2)[C@@H](OC(=O)[C@](C)(c2ccccc2)N2CCCCC2)C3)cc1	0.985	train
Fc1ccc(OCc2cc(OCC3(F)COC3)nc(-c3ccccn3)n2)c(F)c1F	0.985	train
CC(=O)C[C@@H](c1ccccc1)c1c(O)c2ccccc2oc1=O	0.985	train
COc1cc(Nc2ncc(F)c(Nc3ccc4c(n3)N(COP(=O)(O)O)C(=O)C(C)(C)O4)n2)cc(OC)c1OC	0.985	train
Fc1ccc2c(CN3CCO[C@H](COc4cccc(Cl)n4)C3)c[nH]c2c1	0.985	train
O=[N+]([O-])c1ccc(C2=NOC(c3ccc(N4CCSCC4)cc3)C2)o1	0.985	train
C[C@H](CO)Nc1cc(NS(=O)(=O)N2CCOCC2)nc(SCc2cccc(Cl)c2F)n1	0.985	train
C[C@@H](CN1[C@H](C)Cc2c([nH]c3ccccc23)[C@H]1c1ccc(Cl)cc1)C(=O)O	0.985	train
O[C@H](CN1c2ccccc2N(Cc2cccc(OC(F)(F)F)c2)C[C@H]1c1cccc(OC(F)(F)C(F)F)c1)C(F)(F)F	0.985	train
Cc1ccc(-c2noc(COc3ccc(CCC(=O)O)cc3)n2)cc1	0.985	train
CCN(Cc1ccccc1C(F)(F)F)C(=O)C1CCN(S(=O)(=O)c2ccc3[nH]ncc3c2)CC1	0.985	train
COc1cccc(Nc2c(C(N)=O)cnc3c(C)cc(S(=O)(=O)c4cccc(C(=O)N(C)C)c4)cc23)c1	0.985	train
Cc1nc(C)c(-c2ccc(-c3ccc(CC(=O)O)cc3Cl)cc2)nc1C(N)=O	0.985	train
O=C(NOCCO)c1ccn2cncc2c1Nc1ccc(I)cc1F	0.985	train
CC[C@H](c1ccc(C(=O)O)c(Oc2cccc(Cl)c2)c1OC)N1CCC[C@H](n2cc(C)c(=O)[nH]c2=O)C1	0.985	train
CN(C)C(=O)c1ccc2c(c1)c(Oc1c(Cl)cccc1C(F)(F)F)nn2-c1ccc(C(=O)O)cc1	0.985	train
Cn1cc(NC(=O)c2cnn3ccc(N)nc23)c(-c2cc(Cl)ccc2Cl)n1	0.985	train
CCCNc1cc(C(=O)N[C@@H](CCC(=O)O)C(=O)N2CCN(C(=O)OCC)CC2)nc(-c2ccccc2)n1	0.985	train
Cc1c(-c2ccc(N3CCCC(F)C3)cc2)[nH]c2cc(F)cc(F)c2c1=O	0.9845	train
C[C@]12CC[C@@H]3c4ccc(O)cc4CC[C@H]3[C@@H]1CC[C@@H]2O	0.9845	train
Cc1cccnc1CN1CCC2(CC1)C(=O)N(c1ccc(-c3ccc(C(=O)O)cc3)cc1)C(=O)N2c1ccncn1	0.984	train
CNc1ccn2ncc(C(=O)Nc3cc(C)nn3-c3cccc(Cl)c3)c2n1	0.984	train
Cc1c(C#Cc2cnc(N)nc2)cccc1C(=O)Nc1ccc(CN2CCN(C)CC2)c(C(F)(F)F)c1	0.984	train
CC(C)(CO)Nc1nc(SCc2cccc(F)c2F)nc2nc(N)sc12	0.984	train
Cn1cnc2c(F)c(Nc3ccc(Br)cc3Cl)c(C(=O)NOCCO)cc21	0.984	train
O=C1c2oc(-c3ccc(Cl)cc3)cc2Cc2cc(N3CCNCC3)ccc2N1Cc1ccccc1-c1cncnc1	0.984	train
CC(C)(C)c1ccc(S(=O)(=O)Nc2ccc(Cl)cc2-c2nccnc2NCCO)cc1	0.984	train
C[C@@](C(=O)O[C@H]1C[N+]2(CCOCc3ccccc3)CCC1CC2)(c1ccccc1)N1CCCCC1	0.984	train
O=C(O)c1cn(Cc2ccc(-c3ccccc3)cn2)c2c(F)cccc2c1=O	0.984	train
COc1cc(C(=O)Nc2ccc(NC(=O)c3ccccn3)cc2)ccc1O	0.984	train
O=C(O)c1cn(Cc2ccc(-c3ccccc3)nn2)c2c(F)cccc2c1=O	0.984	train
CS(=O)c1nc2cc(Cl)c(Oc3cccc(Cl)c3Cl)cc2[nH]1	0.984	train
Cc1cccc(NC(=O)c2cc(Oc3cncc(F)c3)cc(C)n2)n1	0.984	train
COc1cc(F)c(-c2c(C)nn3c(C(F)(F)F)cc(C)nc23)c(F)c1	0.984	train
C[C@H](NS(=O)(=O)C1CC1)[C@H](Oc1ccc2c(cnn2-c2ccc(F)cc2)c1)c1ccc(S(C)(=O)=O)cc1	0.984	train
C[C@@](CCc1cc(-c2ccccc2)on1)(C(=O)NO)S(C)(=O)=O	0.984	train
Cc1ccc(NC(=O)c2cc(Oc3cncc(F)c3)cn3ccnc23)nc1	0.984	train
Cc1noc(C)c1S(=O)(=O)Nc1c(N2CCC(C)CC2)c(=O)c1=O	0.984	train
COCCNC(=O)c1ccc(Nc2ncc3cc(-c4ccncc4)ccc3n2)cc1	0.983	train
CCc1ccc(Cc2cc([C@@H]3S[C@H](CO)[C@@H](O)[C@H](O)[C@H]3O)c(OC)cc2C)cc1	0.983	train
Cc1cc2ccc1[C@@H](C)COC(=O)Nc1ccc(C3(C(=O)O)CCCCC3)c(c1)CN(C)C(=O)[C@@H]2Nc1ccc2c(N)ncc(F)c2c1	0.983	train
C[C@@H](NC(=O)[C@H]1CCCNC1)c1ccc(Nc2ncc3cc(-c4ccncc4)ccc3n2)cc1	0.983	train
Fc1ccc2c(CN3CCO[C@H](COc4ccccc4)C3)c[nH]c2c1	0.983	train
O=C(O)c1c[nH]c2cc(Cl)c(-c3ccc(C4(O)CCC4)cc3)cc12	0.983	train
Cc1[nH]c(-c2cccc3ccccc23)cc1C(=O)N1CCC(CO)CC1	0.983	train
Cc1cc(N2CCOCC2)cc2[nH]c(-c3c(NCCn4cc(Cl)cn4)cc[nH]c3=O)nc12	0.983	train
O=C(Nc1cc(-c2cc3c([nH]2)C2(CCNC2)CNC3=O)ccn1)c1cccc(OC(F)(F)F)c1	0.983	train
Fc1cccc(CN2CCN(c3ccc4nnc(C(F)(F)F)n4n3)CC2)c1F	0.983	train
CCC1(C)NC(=O)c2cc(S(=O)(=O)Nc3ccc(F)cc3F)cc(Cl)c2NC1=O	0.983	train
C=C(CC(=O)c1ccc(-c2ccccc2Cl)cc1)C(=O)O	0.9825	train
CNC(=O)c1c(-c2ccc(F)cc2)oc2ccc(-c3cc(C(=O)NC4(c5ncccn5)CC4)ccc3C)c(F)c12	0.982	train
CC(C)c1noc(N2CCN(c3ncc(OCc4ccncc4C#N)cn3)[C@H](C)C2)n1	0.982	train
COc1ccc2c(CN3CCC(F)(F)[C@H](CCc4ccc(F)cc4)C3)c[nH]c2c1	0.982	train
O=C(O)c1cn(Cc2ccc(-c3ccccc3)cc2)c2c(F)cccc2c1=O	0.982	train
Cc1cc2ccc1[C@@H](C)COC(=O)Nc1ccc(C3(c4nnn[nH]4)CC3)c(c1)CN(C)C(=O)[C@@H]2Nc1ccc2c(N)ncc(F)c2c1	0.982	train
O=C(NCc1ccc(F)cc1)c1cnn2c1N[C@@H](c1ccc(N3CCOCC3)cc1)C[C@H]2C(F)(F)F	0.982	train
COc1cccc2c1c(NS(=O)(=O)c1ccc(Cl)s1)nn2Cc1cccc(CNC(=O)[C@@H]2COCCN2)c1	0.982	train
O=C(O)c1cn(Cc2ccc(-c3ccccc3)nc2)c2c(F)cccc2c1=O	0.982	train
Cc1noc2c1-c1sc(C)c(C)c1C(c1ccccc1)=N[C@H]2CC(N)=O	0.982	train
CC(C)Oc1ccc(-c2nc(-c3cccc4c3CC[C@@H]4NCCO)no2)cc1C#N	0.982	train
COC(=O)N[C@H](C(=O)N[C@H](Cc1ccc(-c2ccccn2)cc1)C[C@H](O)[C@H](Cc1ccccc1)NC(=O)[C@@H](N1CCN(Cc2cccc(C(C)(C)O)n2)C1=O)C(C)(C)C)C(C)(C)C	0.982	train
O=C(O)CCn1c(=O)oc2cc(Cl)c(Cl)cc21	0.982	train
CS(=O)(=O)Cc1ccc2ccn(-c3cc(NC4CC4)n4ncc(C#N)c4n3)c2c1	0.982	train
CN1CCN(c2ccc(-c3ccc(Cn4cc(C(=O)O)c(=O)c5cccc(F)c54)cc3)cn2)CC1	0.982	train
CCCCc1cc(OC2CCN(CCCCNS(=O)(=O)CC)CC2)c2ncccc2c1	0.982	train
CCC1(O)C(=O)OCc2c1cc1n(c2=O)Cc2cc3ccccc3nc2-1	0.9815	train
CN1C(=O)CN=C(c2ccccc2)c2cc(Cl)ccc21	0.9814	train
CCn1nc(NC(=O)NC2C3CC4CC(C3)CC2C4)cc1C	0.981	train
CC(=O)N[C@H](C)c1ccc(Nc2ncc3cc(-c4ccncc4)c(C)cc3n2)cc1	0.981	train
C[C@@](C(=O)O[C@H]1C[N+]2(CCc3ccc(F)cc3)CCC1CC2)(c1ccccc1)N1CCCCC1	0.981	train
C[C@@](C(=O)O[C@H]1C[N+]2(CCCOc3ccc(F)cc3)CCC1CC2)(c1cccs1)N1CCCCC1	0.981	train
Cc1cc(COc2ccc(S(=O)(=O)N(C)C3(C(=O)NO)CN(C(=O)C(C)C)C3)cc2)c2ccccc2n1	0.981	train
O=C(O)c1cn(Cc2ccc(-c3cccs3)cn2)c2c(F)cccc2c1=O	0.981	train
COCCOc1ccc([C@H]2C[C@@H](C(F)(F)F)n3ncc(C(=O)NCc4ccc(F)cc4)c3N2)cc1	0.981	train
O=C(O[C@@H]1O[C@H](C(=O)O)[C@@H](O)[C@H](O)[C@H]1O)c1c[nH]c2cc(Cl)c(-c3ccc(C4(O)CCC4)cc3)cc12	0.981	train
Cc1nnc2sc(C(=O)NCc3ccc(S(=O)(=O)C(F)(F)F)cc3)c(N)c2c1C	0.981	train
O=C(O)CCn1c(=O)oc2cc(OCC3CCC3)c(Cl)cc21	0.981	train
O=C(O)c1cn(Cc2ccc(-c3ccc(F)cc3)cn2)c2c(F)cccc2c1=O	0.981	train
COc1cc(C(=O)Nc2ccc(NC(=O)c3ccccc3)cc2)cc(-c2c[nH]c(=O)[nH]c2=O)c1O	0.981	train
C[C@H](CO)Nc1cc(NS(C)(=O)=O)nc(SCc2ccccc2)n1	0.981	train
N#Cc1cnn2c(NC3CC3)cc(-n3ccc4ccc(CO)cc43)nc12	0.981	train
O=C(Nc1ccc(NC(=O)c2ccccn2)cc1)c1cccc(-c2c[nH]c(=O)[nH]c2=O)c1	0.981	train
C[C@H](CO)Nc1cc(NS(=O)(=O)N(C)C)nc(SCc2ccccc2)n1	0.981	train
CNC1C(=O)NC2Cc3ccc(cc3)Oc3cc4cc(c3OC3OC(C(=O)O)C(O)C(O)C3NC(=O)CCCCCCCCC(C)C)Oc3ccc(cc3Cl)C(O)C3NC(=O)C(NC(=O)C4NC(=O)C(NC2=O)c2cc(cc(O)c2Cl)Oc2cc1ccc2O)c1ccc(O)c(c1)-c1c(OC2OC(CO)C(O)C(O)C2O)cc(O)cc1C(C(=O)NCCCN(C)C)NC3=O	0.98	train
CCCCc1oc2ccc(NS(C)(=O)=O)cc2c1C(=O)c1ccc(OCCCN(CCCC)CCCC)cc1	0.98	train
Cc1cn(-c2cc(NC(=O)c3ccc(C)c(Nc4nccc(-c5cccnc5)n4)c3)cc(C(F)(F)F)c2)cn1	0.98	train
C[C@H](Nc1ncnc2nc[nH]c12)c1cc2cccc(Cl)c2c(=O)n1-c1ccccc1	0.98	train
CC(C)c1nnc(NC(=O)NC2C3CC4CC(C3)CC2C4)o1	0.98	train
Cc1cccc(C)c1OCC(=O)NC(Cc1ccccc1)C(O)CC(Cc1ccccc1)NC(=O)C(C(C)C)N1CCCNC1=O	0.98	train
CC=CCC(C)C(=O)C1C(=O)NC(C(C)C)C(=O)N(C)CC(=O)N(C)C(CC(C)C)C(=O)NC(C(C)C)C(=O)N(C)C(CC(C)C)C(=O)NC(C)C(=O)NC(C)C(=O)N(C)C(CC(C)C)C(=O)N(C)C(CC(C)C)C(=O)N(C)C(C(C)C)C(=O)N1C	0.98	train
CCNC(=O)Nc1ccc(-c2nc3c(c(N4CCOCC4)n2)CCN(c2ncccn2)C3)cc1	0.98	train
C[C@@](C(=O)O[C@H]1C[N+]2(CCCCc3ccccc3)CCC1CC2)(c1ccccc1)N1CCCCC1	0.98	train
CCNC(=O)Nc1ccc(-c2nc3c(c(N4CCOC[C@@H]4C)n2)CN(c2ncccn2)CC3)cc1	0.98	train
Cc1cccc2nc(C(=O)N[C@H]3CC[C@@H](NC(=O)c4cc(F)cnc4Oc4cccc(-c5ccc(CN6CCC(N7CCCC7)CC6)cc5)c4)CC3)cn12	0.98	train
CCNC(=O)Nc1ccc(-c2nc3c(c(N4CCOC[C@@H]4C)n2)CCN(c2ncccn2)C3)cc1	0.98	train
CCCCc1nc(Cl)c(CO)n1Cc1ccc(-c2ccccc2-c2nnn[nH]2)cc1	0.98	train
COc1cc(-c2cnc3[nH]cc(-c4cnc(N)nc4)c3c2)cc(OC)c1OC	0.98	train
CN(c1nccc(O)n1)C1CCN(c2nc3ccccc3n2Cc2ccc(F)cc2)CC1	0.98	train
CCCCc1ncc(C=C(Cc2cccs2)C(=O)O)n1Cc1ccc(C(=O)O)cc1	0.98	train
Cc1c(O)cccc1C(=O)NC(CSc1ccccc1)C(O)CN1CC2CCCCC2CC1C(=O)NC(C)(C)C	0.98	train
CC(C)c1nc(CN(C)C(=O)NC(C(=O)NC(Cc2ccccc2)CC(O)C(Cc2ccccc2)NC(=O)OCc2cncs2)C(C)C)cs1	0.98	train
CC(C)(C)c1ccc(C(=O)CCCN2CCC(OC(c3ccccc3)c3ccccc3)CC2)cc1	0.98	train
Cc1c(-c2ccc(O)cc2)n(Cc2ccc(OCCN3CCCCCC3)cc2)c2ccc(O)cc12	0.98	train
Cc1c(O)cccc1C(=O)N[C@@H](CSc1ccccc1)[C@H](O)CN1C[C@H]2CCCC[C@H]2C[C@H]1C(=O)NC(C)(C)C	0.98	train
Cc1ccc(NC(=O)c2cccc(N3CCOCC3)c2)cc1NC(=O)c1ccc(OCc2cscn2)cc1	0.98	train
CNC1CCC(c2ccc(Cl)c(Cl)c2)c2ccccc21	0.98	train
COc1ccc(N(Cc2cnccc2C)C2CCN([C@H](C)CCNC(=O)c3c(C)cc(C#N)nc3C)CC2)cc1	0.98	train
COc1nc(-c2nc(Nc3cc(C(F)(F)F)ccc3F)n(C)n2)ccc1-n1cnc(C)c1	0.98	train
C=CC(=O)Nc1ccc(S(=O)(=O)N2CCN(C(=O)C34CC5CC(CC(C5)C3)C4)CC2)cc1	0.98	train
CN(C)CC(=O)N1CCn2c(c(C3CCCCC3)c3ccc(C(=O)O)cc32)-c2ccc(F)cc2C1	0.98	train
COc1ccccc1OCCNC[C@@H](O)COc1cccc2[nH]c3ccccc3c12	0.98	train
COc1ccccc1OCCNCC(O)COc1cccc2[nH]c3ccccc3c12	0.98	train
CCCc1cc(C)[nH]c(=O)c1CNC(=O)c1c(C)n([C@H](C)C2CCN(S(=O)(=O)CC)CC2)c2ccccc12	0.98	train
OC(c1cc(C(F)(F)F)nc2c(C(F)(F)F)cccc12)C1CCCCN1	0.98	train
Cc1csc(N(C)C(=O)CSc2ccc(-c3ccccc3)nn2)n1	0.98	train
CC(C(=O)O)c1ccc(C(=O)c2ccccc2)s1	0.98	train
OC[C@H]1C[C@@H](O)CCN1CCc1ccc(Nc2nc(-c3ccc(Cl)cc3Cl)cs2)cc1	0.98	train
O[C@@H](c1cc(C(F)(F)F)nc2c(C(F)(F)F)cccc12)[C@H]1CCCCN1	0.98	train
COc1ccc2c(c1)c(CN1CCN(C)CC1)cn2S(=O)(=O)c1ccccc1Br	0.98	train
COc1cc2ncnc(Nc3ccc(F)c(Cl)c3)c2cc1NC(=O)C=CCN1CCCCC1	0.98	train
O=C(O)CSc1nnc(Br)n1-c1ccc(C2CC2)c2ccccc12	0.98	train
CCS(=O)(=O)N1CCCc2ccc(NC(=O)c3ccccc3Br)cc21	0.98	train
O=C1C(CCS(=O)c2ccccc2)C(=O)N(c2ccccc2)N1c1ccccc1	0.98	train
Cn1cnc(S(=O)(=O)N2C[C@H]3[C@@H](C2)[C@]3(CNC(=O)c2ccc(Cl)c(Cl)c2)CC2CC2)c1	0.98	train
O[C@@H](CNC[C@H](O)[C@H]1CCc2cc(F)ccc2O1)[C@@H]1CCc2cc(F)ccc2O1	0.98	train
CCOc1cc(CC(=O)NC(CC(C)C)c2ccccc2N2CCCCC2)ccc1C(=O)O	0.98	train
NC(=O)C(c1ccccc1)(c1ccccc1)[C@@H]1CCN(CCc2ccc3c(c2)CCO3)C1	0.98	train
CCCC(=O)N(C)c1cccc(NC(=O)c2ccccc2Br)c1	0.98	train
OC(CNCC(O)C1CCc2cc(F)ccc2O1)C1CCc2cc(F)ccc2O1	0.98	train
COC(=O)Nc1ccc2c(c1)NC(=O)C[C@@H](C)CCC[C@H](NC(=O)/C=C/c1cc(Cl)ccc1-n1cnnn1)c1nc-2c[nH]1	0.98	train
Cc1ccc(Sc2ccccc2N2CCNCC2)c(C)c1	0.98	train
NC(=O)C(c1ccccc1)(c1ccccc1)C1CCN(CCc2ccc3c(c2)CCO3)C1	0.98	train
CCOC(=O)N1CCC(=C2c3ccc(Cl)cc3CCc3cccnc32)CC1	0.98	train
C#CC1(O)CCC2C3CCc4cc(OC)ccc4C3CCC21C	0.98	train
CCCCCNC(=N)NN=Cc1c[nH]c2ccc(OC)cc12	0.98	train
CC(C)c1cccc(C(C)C)c1OCOP(=O)(O)O	0.98	train
C#CC1(O)CCC2C3CCC4=CCCCC4C3C(=C)CC21CC	0.98	train
COC(=O)[C@H](c1ccccc1Cl)N1CCc2sccc2C1	0.98	train
CCC(=O)OC1CCC2C3CCC4=CC(=O)CCC4(C)C3CCC12C	0.98	train
Cc1c(Cc2ccc(=O)n(Cc3ccc(F)cc3F)n2)c2cc(F)ccc2n1CC(=O)O	0.98	train
CC#CC1(O)CCC2C3CCC4=CC(=O)CCC4=C3C(c3ccc(N(C)C)cc3)CC21C	0.98	train
Cc1ncc(NC(=O)c2cccc(C(F)(F)F)c2)cc1-c1cnc(OC2CCOCC2)c(N2CCOCC2)c1	0.98	train
CC(C)c1c(C(=O)Nc2ccccc2)c(-c2ccccc2)c(-c2ccc(F)cc2)n1CCC(O)CC(O)CC(=O)O	0.98	train
COC(O)=C1C(C)=NC(C)=C(C(=O)OCCN(C)Cc2ccccc2)C1c1cccc([N+](=O)[O-])c1	0.98	train
CC(=O)Nc1cc(Nc2cc(NC3CC3)n3ncc(C#N)c3n2)ccc1C1CC1	0.98	train
CCCNC(=O)c1c(NC(=O)C23CC4CC(CC2C4)C3)sc2c1CCOC2	0.98	train
Cn1ccc2c(Cc3ccc(-c4nccs4)cc3)cc(C(=O)N[C@@H]3CCOC[C@H]3O)nc21	0.98	train
CN[C@H]1CC[C@@H](c2ccc(Cl)c(Cl)c2)c2ccccc21	0.98	train
COc1cc2c(cc1Cc1cccc(Cl)c1F)c(=O)c(C(=O)O)cn2C(CO)C(C)C	0.98	train
COc1cc2c(cc1Cc1cccc(Cl)c1F)c(=O)c(C(=O)O)cn2[C@H](CO)C(C)C	0.98	train
COC1C=COC2(C)Oc3c(C)c(O)c4c(O)c(c(C=NN5CCN(C6CCCC6)CC5)c(O)c4c3C2=O)NC(=O)C(C)=CC=CC(C)C(O)C(C)C(O)C(C)C(O)C1C	0.98	train
COc1ccnc(CS(=O)c2nc3cc(OC(F)F)ccc3[nH]2)c1OC	0.98	train
CC(C)Nc1cccnc1N1CCN(C(=O)c2cc3cc(NS(C)(=O)=O)ccc3[nH]2)CC1	0.98	train
COc1ccnc(CS(=O)c2nc3ccc(OC(F)F)cc3[nH]2)c1OC	0.98	train
Clc1ccccc1CN1CCc2sccc2C1	0.98	train
C[C@H]1[C@H](F)C[C@@H](C(=O)NCc2cc(-c3cnc(C(F)(F)F)nc3)ncc2F)N1S(=O)(=O)c1ccc(F)cc1	0.98	train
CC12CCC3c4ccc(O)cc4CCC3C1CCC2O	0.98	train
CC(C)Cc1ccc(C(C)(C)C(=O)O)cc1	0.98	train
CCCCCN=C(N)NN=Cc1c[nH]c2ccc(OC)cc12	0.98	train
O=C(O)C1=C(CSc2nnnn2CS(=O)(=O)O)CSC2C(NC(=O)C(O)c3ccccc3)C(=O)N12	0.98	train
Cc1cc(C)c(CNC(=O)c2c(C)n(C(C)c3ccccn3)c3ccccc23)c(=O)[nH]1	0.98	train
OCCN1CCN(CCC=C2c3ccccc3Sc3ccc(Cl)cc32)CC1	0.98	train
CCOC(=O)C1=C(CN2CCOC[C@H]2C(=O)O)NC(c2nccs2)=N[C@H]1c1cccc(F)c1Cl	0.98	train
CCCN1C(=O)CN=C(c2ccccc2F)c2cc(Cl)ccc21	0.98	train
CC(C)n1c(C=C[C@H](O)C[C@H](O)CC(=O)O)c(-c2ccc(F)cc2)c2ccccc21	0.98	train
COC1C=COC2(C)Oc3c(C)c(O)c4c(O)c(c(C=NN5CCN(C6CCCC6)CC5)c(O)c4c3C2=O)NC(=O)C(C)=CC=CC(C)C(O)C(C)C(O)C(C)C(OC(C)=O)C1C	0.98	train
OC[C@H]1O[C@H](Oc2ccc(-n3ccc4ccccc43)cc2Cl)[C@@H](O)[C@@H](O)[C@@H]1O	0.98	train
Oc1nc2ccccc2n1CCN1CCN(c2cccc(C(F)(F)F)c2)CC1	0.98	train
CS(=O)(=O)Nc1ccc(OC[C@@H](O)CNCCc2ccc(Cl)c(Cl)c2)cc1	0.98	train
O=C(O)CCC(=O)c1ccc(-c2ccccc2)cc1	0.98	train
O=C(NC[C@@H](O)CN1CCC(Oc2ccc(Cl)c(Cl)c2)CC1)c1c[nH]c(=O)c2ccccc12	0.98	train
CC(C)[C@H]1CC[C@H](C(=O)N[C@H](Cc2ccccc2)C(=O)O)CC1	0.98	train
O=C(NC[C@@H](O)CN1CCC(Oc2ccc(Cl)c(Cl)c2)CC1)c1c[nH]nc1C(F)(F)F	0.98	train
CC(C)C1CCC(C(=O)NC(Cc2ccccc2)C(=O)O)CC1	0.98	train
COc1cc(N)c(Cl)cc1C(=O)NC1CCN(CCCOc2ccc(F)cc2)CC1OC	0.98	train
CC(C)n1c(C=CC(O)CC(O)CC(=O)O)c(-c2ccc(F)cc2)c2ccccc21	0.98	train
Fc1ccc(CN2CCN(c3ccc4nnc(C(F)(F)F)n4n3)CC2)cc1	0.98	train
Cc1ccc2c(=O)n(-c3ccc4c(cnn4C)c3)c(CCN3C(=O)c4ccccc4C3=O)nc2c1	0.98	train
COc1ccc2c(c1)CN(c1ccc(C(C)C(=O)O)cc1)C2=O	0.98	train
CN1C(=O)N(Cc2cc(Cl)ccc2F)C(=O)[C@]12C(=O)N(CC(=O)O)c1ccc(Cl)cc12	0.98	train
COc1cncc(-c2cccc(-c3cn4ccc(OC)c(C(N)=O)c4n3)c2)c1	0.98	train
C=C1C(=O)OC2CC3(C)CCCC(=C)C3CC12	0.98	train
COc1ccc(COc2ccc(Cc3cnc(N)nc3N)cc2OC)cc1	0.98	train
C=CC(=O)Nc1cccc(S(=O)(=O)N2CCN(C(=O)OCc3ccccc3)CC2)c1	0.98	train
COc1cc2nc(N3CCN(C(=O)[C@H]4COc5ccccc5O4)CC3)nc(N)c2cc1OC	0.98	train
O=C(O[C@H]1CN2CCC1CC2)N1CCc2ccccc2[C@@H]1c1ccccc1	0.98	train
OC[C@H]1O[C@H](Oc2ccc(-n3ccc4ccccc43)cc2F)[C@@H](O)[C@@H](O)[C@@H]1O	0.98	train
CNCC[C@@H](Oc1ccccc1C)c1ccccc1	0.98	train
C[C@H]1COCCN1c1nc(-c2ccc(Nc3cccc(=O)[nH]3)cc2)nc2c1COC2(C)C	0.98	train
CC(=O)Nc1cc(Nc2cc(NC3CC3)n3ncc(C#N)c3n2)ccc1N(C)CCN1CC(F)(F)C1	0.98	train
COc1ccccc1OCCNCC(O)c1ccc(C)c(S(N)(=O)=O)c1	0.98	train
C[C@H](CCC(=O)O)[C@H]1CC[C@H]2[C@@H]3CC[C@@H]4C[C@H](O)CC[C@]4(C)[C@H]3C[C@H](O)[C@@]21C	0.98	train
Cn1cc(-c2ccc(Cn3cc(C(=O)O)c(=O)c4ccccc43)c(F)c2)cn1	0.98	train
CC(C)(C)NC(=O)C1CC2CCCCC2CN1CC(O)C(Cc1ccccc1)NC(=O)C(CC(N)=O)NC(=O)c1ccc2ccccc2n1	0.98	train
Cc1cc(C)c(CNC(=O)c2c(C)n(C(C)c3cnn(C)c3)c3ccccc23)c(=O)[nH]1	0.98	train
CC(C)(C)NC(=O)[C@@H]1C[C@@H]2CCCC[C@@H]2CN1C[C@@H](O)[C@H](Cc1ccccc1)NC(=O)[C@H](CC(N)=O)NC(=O)c1ccc2ccccc2n1	0.98	train
Cc1onc(-c2ccccc2)c1-c1ccc(S(N)(=O)=O)cc1	0.98	train
CCCCCCCCCCCCCCCCOP(=O)(O)OCC[N+](C)(C)C	0.98	train
O=C(O)c1cc(CN2CCc3cc(Cl)ccc3C2)c2ccccn2c1=O	0.98	train
O=c1[nH]c2ccccc2n1CCN1CCN(c2cccc(C(F)(F)F)c2)CC1	0.98	train
N#Cc1ccc2[nH]cc(CCCCN3CCN(c4ccc5oc(C(N)=O)cc5c4)CC3)c2c1	0.98	train
CN1C(=O)c2c3c(c(O)c(=O)n2[C@]12CC[C@@H]1C[C@@]12CO)C(=O)N(Cc1ccc(F)c(Cl)c1)CC3	0.98	train
O=C(Nc1ccc(F)cn1)c1cc(Oc2cncc(F)c2)cn2ccnc12	0.98	train
CCN(CC)C(=O)C(C#N)=Cc1cc(O)c(O)c([N+](=O)[O-])c1	0.98	train
CCn1c(=O)c2c(nc(C=Cc3ccc(OC)c(OC)c3)n2C)n(CC)c1=O	0.98	train
CCNC(=O)Nc1ccc(-c2nc(N3CCOCC3)c3c(n2)C(C)(C)OC3=O)cc1	0.98	train
O=C(Nc1ccc(F)cc1)N1N=C(c2ccncc2)CC1c1ccc(F)cc1	0.98	train
NS(=O)(=O)c1ccc(S(=O)(=O)Nc2cccc3c(Cl)c[nH]c23)cc1	0.98	train
C[C@]1(O)CC[C@H]2[C@@H]3CCC4=CC(=O)CC[C@]4(C)[C@@]3(F)[C@@H](O)C[C@@]21C	0.98	train
CC1CC(=O)NN=C1c1ccc(NN=C(C#N)C#N)cc1	0.98	train
O=C1c2ccc(COc3ccccc3)nc2CCN1c1ccc(F)cc1	0.979	train
C[C@H](CO)Nc1cc(NS(=O)(=O)c2cn(C)cn2)nc(SCc2cccc(F)c2F)n1	0.979	train
COc1cc2c(Nc3ccc(NC(=O)c4ccccc4)cc3)nc(Cl)nc2cc1O	0.979	train
CN(C)Cc1nccn1-c1ccc(N2CCC(NS(=O)(=O)c3ncc(-c4ccc(Cl)s4)s3)C2=O)c(F)c1	0.979	train
CC(C)c1cccc(C(C)C)c1O	0.97875	train
O=C(Nc1ccc(O)c(C(=O)O)c1)c1ccc(NC(=O)c2ccco2)cc1	0.9785	train
C[C@@](CCc1ccc(-c2ccccc2)cc1)(C(=O)NO)S(C)(=O)=O	0.9785	train
CNc1nc2ccccc2n1-c1nc(N2CCOC[C@H]2C)cc(C2(S(C)(=O)=O)CC2)n1	0.978	train
COc1cc(N2C(=O)N(c3ccc(-c4ccc(C(=O)O)cc4)nc3)C(=O)C23CCN(Cc2ncccc2C)CC3)ncn1	0.978	train
C/C=C/CC(C)C(=O)C1C(=O)NC(C(C)C)C(=O)N(C)CC(=O)N(C)C(CC(C)C)C(=O)NC(C(C)C)C(=O)N(C)C(CC(C)C)C(=O)NC(C)C(=O)NC(C)C(=O)N(C)C(CC(C)C)C(=O)N(C)C(CC(C)C)C(=O)N(C)C(C(C)C)C(=O)N1C	0.978	train
C[C@@](C(=O)O[C@H]1C[N+]2(CCc3cccc(Cl)c3)CCC1CC2)(c1cccs1)N1CCCCC1	0.978	train
Cc1ccc(-c2ncc(C)n2C)cc1NC(=O)c1ccc(OCc2ccccn2)cc1	0.978	train
Cn1nc(C2CC2)c2ccc(Nc3n[nH]c4cccnc34)cc21	0.978	train
O=C1NC(c2ccccc2)CC(O)=C1Oc1ccccc1Cl	0.978	train
O=C(NCC1(N2CCN(c3ccccc3)CC2)CCOCC1)c1cccnc1Sc1ccccc1	0.978	train
CCOc1cc(CN2CCC3(CC2)CC(=O)N(c2ccc(C(=O)O)cc2)C3)cc(OCC)c1-c1ccc(F)cc1	0.978	train
COc1cccc(-c2ccc(Cn3cc(C(=O)O)c(=O)c4cccc(F)c43)nc2)c1	0.978	train
CC(C)N1CC(c2nc(C(=O)NCc3ccc(F)cc3)c(O)c3ncccc23)CC1=O	0.978	train
CCCCCN(CCCOC)C(=O)C(CCC(=O)O)NC(=O)c1ccc(Cl)c(Cl)c1	0.978	train
COC(=O)c1ccc2c(c1)NC(=O)C2=C(Nc1ccc(N(C)C(=O)CN2CCN(C)CC2)cc1)c1ccccc1	0.978	train
Nc1ncnc2c1C(=O)N(c1ccc(-c3ccc(C(F)F)cc3Cl)cc1)CCO2	0.978	train
Cc1ccc([C@@H](C)Oc2cc3oc(=O)n(CCC(=O)O)c3cc2Cl)nc1	0.978	train
N#Cc1cc(Cl)c(C(=O)Nc2ccnc(NC(=O)C3CC3)c2)c(Cl)c1	0.978	train
CN(C)c1cccc(-c2ccc(Cn3cc(C(=O)O)c(=O)c4cccc(F)c43)cn2)c1	0.978	train
Oc1cc(O)c2c(c1)OC(c1ccc(O)c(O)c1)C(O)C2	0.9775	train
C=CC(=O)Nc1cc(Nc2ncc(Cl)c(-c3cn(C)c4ccccc34)n2)c(OC)cc1N(C)CCN(C)C	0.977	train
C[C@@H](NC1=CC(=O)NCC1)c1ccc(Nc2ncc3cc(-c4ccncc4)ccc3n2)cc1	0.977	train
O=C(Nc1nnc(C2CC2)o1)NC1C2CC3CC(C2)CC1C3	0.977	train
C[C@@H](Oc1cc(-n2cnc3ccc(OCC4CCN(C)CC4)cc32)sc1C(N)=O)c1ccccc1C(F)(F)F	0.977	train
C[C@@](C(=O)O[C@H]1C[N+]2(Cc3cc(-c4ccccc4)no3)CCC1CC2)(c1cccs1)N1CCCCC1	0.977	train
Cc1cc2ccc1[C@@H](C)COC(=O)Nc1ccc(S(=O)(=O)C3CC3)c(c1)CN(C)C(=O)[C@@H]2Nc1ccc2c(N)ncc(F)c2c1	0.977	train
CCCc1c(C(=O)Nc2cc(S(=O)(=O)N(C)C)ccc2C)cnn1-c1ccccc1	0.977	train
O=C(O)CN1C(=O)[C@@]2(NC(=O)N(Cc3cc(Cl)ccc3F)C2=O)c2cc(Cl)ccc21	0.977	train
CN1CCC(COc2cnc(-c3cccc(Cn4nc(-c5cccc(C#N)c5)ccc4=O)c3)nc2)CC1	0.977	train
Cc1cc(Oc2cncc(F)c2)cc(C(=O)Nc2cccc(F)n2)n1	0.977	train
COc1cc2c(Nc3ccc(NC(=O)c4ccccc4)cc3)nc(N)nc2cc1O	0.977	train
CO[C@H]1C=CO[C@@]2(C)Oc3c(C)c(O)c4c(O)c(c(C=NN5CCN(C6CCCC6)CC5)c(O)c4c3C2=O)NC(=O)C(C)=CC=C[C@H](C)[C@H](O)[C@@H](C)[C@@H](O)[C@@H](C)[C@H](OC(C)=O)[C@@H]1C	0.977	train
COCCNC(=O)c1cnc(N)c2cc(-c3ccc(S(=O)(=O)NC(C)(C)C)cc3)sc12	0.977	train
Cn1nc(-c2cccc3ccccc23)cc1C(=O)N1CCC(CO)CC1	0.977	train
Cc1ccc2nc(N3CCCc4ccc(F)cc4C3)cc(NCC3(N)COC3)c2c1	0.976	train
CS(=O)(=O)NCCNc1nonc1/C(=N/O)Nc1ccc(F)c(Br)c1	0.976	train
C[C@@](C(=O)O[C@H]1C[N+]2(Cc3nc(-c4ccccc4)no3)CCC1CC2)(c1ccccc1)N1CCCCC1	0.976	train
Cc1cc(C#Cc2cn(-c3ccc(F)cc3)c(C)n2)ccn1	0.976	train
O=C(N1CCCC1)N1CCc2nc(C#Cc3ccccc3)sc2C1	0.976	train
O=C(NCCO)c1cccc(-c2ccc(Cn3cc(C(=O)O)c(=O)c4cccc(F)c43)cc2)c1	0.976	train
C[C@@H]1c2nnn(-c3cc(F)ccn3)c2CCN1C(=O)c1cccc(C(F)(F)F)c1Cl	0.976	train
CC(=O)Nc1cc(Nc2cc(NC3CCC3)n3ncc(C#N)c3n2)ccc1C	0.976	train
CC1=C(C(N)=O)C(c2ccc(N(C)C)cc2)n2nc(SCc3ccccc3)nc2N1	0.976	train
Cc1ccc(OC2CCN(c3c(C#N)cnc4ccc(F)cc34)CC2)cn1	0.976	train
O=C(O)c1cn(Cc2ccc(-c3ccncc3)cc2)c2c(F)cccc2c1=O	0.976	train
O=C(O)c1cn(Cc2ccc(-c3ccc(F)nc3)nc2)c2c(F)cccc2c1=O	0.976	train
Cc1cccc(NC(=O)c2cc(Oc3cncc(F)c3)cn3ccnc23)n1	0.976	train
Cc1cccc(Cl)c1Oc1nn(-c2ccc(C(=O)O)cc2)c2ccc(C(=O)N(C)C)cc12	0.976	train
Cc1cc2oc(=O)n(CCC(=O)O)c2cc1Cl	0.976	train
Nc1ncc(-c2cnc3[nH]cc(-c4ccc5[nH]ccc5c4)c3c2)cn1	0.976	train
O=C(N[C@@H]1CCCc2cc(CN3CCCCC3)ccc21)[C@H](O)[C@H](O)CS(=O)(=O)c1ccc2ccccc2c1	0.9754	train
C=CC(=O)Nc1cc(Nc2ncc(Cl)c(-c3cnn4ccccc34)n2)c(OC)cc1N1CC(N(C)C)C1	0.975	train
C[C@@](C(=O)O[C@H]1C[N+]2(CCOCCc3ccccc3)CCC1CC2)(c1ccccc1)N1CCCCC1	0.975	train
C[C@@](C(=O)O[C@H]1C[N+]2(CC(=O)Nc3ccccc3)CCC1CC2)(c1cccs1)N1CCCCC1	0.975	train
CSCCNc1nc(SCCC(F)(F)F)nc2c1ncn2[C@@H]1O[C@H](COP(=O)(O)OP(=O)(O)C(Cl)(Cl)P(=O)(O)O)[C@@H](O)[C@H]1O	0.975	train
C[C@H](O)CN1C(=O)c2c3c(c(O)c(=O)n2[C@@]12CC[C@H]1C[C@H]12)C(=O)N(Cc1ccc(F)c(Cl)c1)CC3	0.975	train
CC#CC(=O)N1CCC[C@H]1c1nc(-c2ccc(C(=O)Nc3ccccn3)cc2)c2c(N)nccn12	0.975	train
O=C(O)CCn1c2c(c3ccccc31)C[C@H](NS(=O)(=O)c1ccc(F)cc1)CC2	0.975	train
O=C(Nc1ccnc(NC(=O)[C@H]2C[C@H]2F)c1)c1c(Cl)cccc1Cl	0.975	train
C=CC(=O)N1CCC[C@@H](n2nc(-c3ccc(Oc4ccccc4)cc3)c3c(N)ncnc32)C1	0.974333	train
COc1cc2nc(Nc3ccc([C@@H](C)NC(C)=O)cc3)ncc2cc1-c1ccncc1	0.974	train
C[C@@](C(=O)O[C@H]1C[N+]2(CCc3cccc(Br)c3)CCC1CC2)(c1ccccc1)N1CCCCC1	0.974	train
CC[C@@H]1C[C@]1(NC(=O)[C@@H]1C[C@@H](Oc2cc(-c3csc(NC(C)C)n3)nc3c(Cl)c(OCCN4CCOCC4)ccc23)CN1C(=O)[C@@H](NC(=O)O[C@@H]1C[C@@H]2C[C@@H]2C1)C(C)(C)C)C(=O)O	0.974	train
C[C@@H](Oc1cc(-n2cnc3ccc(OCCCN(C)C)cc32)sc1C(N)=O)c1ccccc1Cl	0.974	train
Nc1nc2ccc(OC3CCOC3)nc2n1CC(O)c1ccc(C(F)(F)F)cc1Cl	0.974	train
Cc1nc2sc(C(=O)NCc3ccncc3)c(N)c2c(C)c1Cl	0.974	train
O=C(Nc1cccc(F)n1)c1cc(Oc2cncc(F)c2)cn2ccnc12	0.974	train
CN1CCN2c3c(cccc31)[C@@H]1CN(CCCC(=O)c3ccc(F)cc3)CC[C@@H]12	0.974	train
CC(=O)Nc1cccc(-n2c(=O)n(C3CC3)c(=O)c3c(Nc4ccc(I)cc4F)n(C)c(=O)c(C)c32)c1	0.974	train
COc1ccc(-c2c(CO)n(C)c3ccc(S(C)(=O)=O)cc23)cn1	0.974	train
Cc1ncc2n1-c1ccc(Cl)cc1C(c1ccccc1F)=NC2	0.973333	train
CNC(=O)[C@@]12C[C@@H]1[C@@H](n1cnc3c(NC)nc(C#Cc4ccc(Br)s4)nc31)[C@H](O)[C@@H]2O	0.9733	train
CNC(=O)[C@@]12C[C@@H]1[C@@H](n1cnc3c(NC)nc(C#Cc4ccc(Cl)s4)nc31)[C@H](O)[C@@H]2O	0.9733	train
CN(C)CCN(C)C1COc2ccccc2-c2c(C3CCCCC3)c3ccc(C(=O)O)cc3n2C1	0.973	train
CNC(=O)CN1CCC(Oc2cc3c(Nc4ccc(F)c(Cl)c4)ncnc3cc2OC)CC1	0.973	train
CCc1ccccc1C(=O)N(C1CCC2(CC1)OCCO2)[C@H](CCN1CCOCC1)Cc1ccc(Cl)cc1	0.973	train
N#Cc1csc(NC(=O)C2c3ccccc3Oc3ccccc32)n1	0.973	train
C=CC(=O)Nc1cc(Nc2ncc(Cl)c(-c3cnn4ccccc34)n2)c(OC)cc1N1CC[C@@H](N(C)C)C1	0.973	train
Cc1c(-c2ccc(N3CCC(F)(F)C3)cc2)[nH]c2cc(F)cc(F)c2c1=O	0.973	train
Cc1ccoc1C(=O)Nc1ccc(N2C(=O)c3cccc(F)c3C2=O)cc1F	0.973	train
COc1cc(-c2nc3n(n2)CCC[C@H]3c2ccc(F)cc2C)ccc1-n1cnc(C)c1	0.973	train
O=C(NCc1ccc(F)cc1)c1cnn2c1N[C@@H](c1ccc(OC3COC3)cc1)C[C@H]2C(F)(F)F	0.973	train
CC(=O)N1CCN(CCOc2ccc(C3CCN(c4ccc5nnc(C(F)(F)F)n5n4)CC3)cc2)CC1	0.973	train
CN1CCC2(CC1)CNC(=O)c1cc(-c3ccnc(NC(=O)c4cccc(OC(F)(F)F)c4)c3)[nH]c12	0.973	train
C[C@@H](Nc1c(C(N)=O)cnn2cccc12)C(C)(C)C	0.973	train
Cc1cc(Nc2nccc3nc(-c4c(Cl)cc(C#N)cc4Cl)[nH]c23)ncn1	0.972	train
Cc1cc2ccc1[C@@H](C)COC(=O)Nc1ccc(C3(C(=O)O)CCCC3)c(c1)CN(C)C(=O)[C@@H]2Nc1ccc2c(N)ncc(F)c2c1	0.972	train
NC(=O)c1cncc(-c2ccc([C@H]3CC[C@H](CCO)CC3)cc2)n1	0.972	train
O=C(NCc1ccc(S(=O)(=O)c2ccc(N3CCOCC3)nc2)cc1)c1cnc2nccn2c1	0.972	train
C[C@@H]1CC[C@@H](Oc2cc(C#N)ccn2)CN1C(=O)c1ccccc1-c1ncccn1	0.972	train
Clc1ccc(-c2ccc(-c3nccn3-c3ccc(N4CCNCC4)cc3)o2)cc1	0.972	train
COc1ccc(NC(=O)c2cc(Oc3cncc(F)c3)cn3ccnc23)nc1	0.972	train
CN[C@@H](C)C(=O)N[C@H](C(=O)N1CC=C[C@H]1C(=O)N[C@H]1c2ccccc2C[C@H]1OCC#CC#CCO[C@@H]1Cc2ccccc2[C@@H]1NC(=O)[C@@H]1C=CCN1C(=O)[C@@H](NC(=O)[C@H](C)NC)C1CCCCC1)C1CCCCC1	0.971	train
C=CC(=O)Nc1cc(Nc2nccc(-c3cn(C)c4ccccc34)n2)c(OC)cc1N(C)CCN(C)C	0.971	train
Cc1cc(Nc2ncnc3ccc(NC4=NC(C)(C)CO4)cc23)ccc1Oc1ccn2ncnc2c1	0.971	train
CN(C)C(=O)Cn1c(-c2ccccc2)c(C2CCCCC2)c2ccc(C(=O)O)cc21	0.971	train
Cc1cc(C)nc(N2C[C@H]3CN(C(=O)c4c(F)cccc4-n4nccn4)C[C@H]3C2)n1	0.971	train
C[C@@](C(=O)O[C@H]1C[N+]2(CC(=O)Nc3cncc(Cl)n3)CCC1CC2)(c1cccs1)N1CCCCC1	0.971	train
Cc1noc(C)c1S(=O)(=O)Nc1c(N2CCN(Cc3ccc(C#N)cc3)CC2)c(=O)c1=O	0.971	train
CC[C@H](C)C[C@H](C)CCCCCCCCC(=O)N[C@H]1C[C@@H](O)[C@H](NCCN)NC(=O)[C@@H]2[C@@H](O)CCN2C(=O)[C@@H]([C@H](O)CCN)NC(=O)[C@H]([C@H](O)[C@@H](O)c2ccc(O)cc2)NC(=O)[C@@H]2C[C@@H](O)CN2C(=O)[C@H]([C@@H](C)O)NC1=O	0.97	train
Cc1cc(Nc2ncc(Cl)c(Nc3ccccc3S(=O)(=O)C(C)C)n2)c(OC(C)C)cc1C1CCNCC1	0.97	train
CC(C)c1nc(CN(C)C(=O)NC(CCN2CCOCC2)C(=O)NC(CCC(Cc2ccccc2)NC(=O)OCc2cncs2)Cc2ccccc2)cs1	0.97	train
CN(C)CCN1CCn2c(c(C3CCCCC3)c3ccc(C(=O)O)cc32)-c2ccccc2C1	0.97	train
CCCCNc1cccc(NC(=O)c2ccccc2Br)c1	0.97	train
CC(C)c1nc(CN(C)C(=O)N[C@@H](CCN2CCOCC2)C(=O)N[C@H](CC[C@H](Cc2ccccc2)NC(=O)OCc2cncs2)Cc2ccccc2)cs1	0.97	train
COc1ccc(CCN2CCC(Nc3nc4ccccc4n3Cc3ccc(F)cc3)CC2)cc1	0.97	train
CCCCCc1cc(O)c2c(c1)OC(C)(C)C1CCC(C)=CC21	0.97	train
CC(C)CC(N(C)C)C1(c2ccc(Cl)cc2)CCC1	0.97	train
Cc1nc(C)c(-c2ccc([C@H]3CC[C@H](CCO)CC3)cc2)nc1C(N)=O	0.97	train
Clc1ccc(-c2cc(C3(c4ccccc4)CCN(CCc4ccccc4)CC3)[nH]n2)cc1	0.97	train
CCOc1cc2nccc(Oc3cnc(CC(=O)Nc4n[nH]c(CC)c4C)c(OC)c3)c2cc1OC	0.97	train
Cc1cc(COc2ccc(S(=O)(=O)N3CCN(C(=O)C(C)(C)C)C(C(=O)NO)C3)cc2)c2c(n1)CCCC2	0.97	train
O=C(N=c1c(Cl)cn(O)cc1Cl)c1ccc(OC(F)F)c(OCC2CC2)c1	0.97	train
CC(C)C[C@@H](N(C)C)C1(c2ccc(Cl)cc2)CCC1	0.97	train
Cc1c(C(=O)Nc2ccc(N3C[C@H](C)O[C@H](C)C3)nc2)cccc1-c1ccc(OC(F)(F)F)cc1	0.97	train
Cn1cc(-c2cccc(N3CCc4c(sc5c4CCCC5)C3=O)c2CO)cc(Nc2ccncn2)c1=O	0.97	train
Cc1c(C(=O)Nc2ccc(N3CC(C)OC(C)C3)nc2)cccc1-c1ccc(OC(F)(F)F)cc1	0.97	train
O=C1CN=C(c2ccccc2)c2cc(Cl)ccc2N1CC1CC1	0.97	train
Cc1ccoc1C(=O)Nc1ccc(N2C(=O)c3ccc(F)cc3C2=O)cc1F	0.97	train
C[C@]12CC[C@H]3[C@H]([C@@H]1[C@@H]1C[C@@H]1[C@@]21CCC(=O)O1)[C@H]1C[C@H]1C1=CC(=O)CC[C@@]13C	0.97	train
CCOc1ccccc1OC(c1ccccc1)C1CNCCO1	0.97	train
CCN(C(C)=O)[C@H]1CO[C@@H](O[C@@H]2[C@@H](O)[C@H](NO[C@H]3C[C@H](O)[C@H](SC(=O)c4c(C)c(I)c(O[C@@H]5O[C@@H](C)[C@H](O)[C@@H](OC)[C@H]5O)c(OC)c4OC)[C@@H](C)O3)[C@@H](C)O[C@H]2O[C@H]2C#CC=CC#C[C@]3(O)CC(=O)C(NC(=O)O)=C2/C3=C\CCSSSC)C[C@@H]1OC	0.97	train
C#CC1(O)CCC2C3CCC4=C/C(=N/O)CCC4C3CCC21CC	0.97	train
COc1cc(NS(C)(=O)=O)ccc1Nc1c2ccccc2nc2ccccc12	0.97	train
Cn1nc(C2CC2)c2ccc(Nc3n[nH]c4ncccc34)cc21	0.97	train
Cc1c(OCC(F)(F)F)ccnc1CS(=O)c1nc2ccccc2[nH]1	0.97	train
Cc1ccc(C)c(OCCCC(C)(C)CC(=O)O)c1	0.97	train
C#CC1(O)CCC2C3CCC4=CC(=NO)CCC4C3CCC21CC	0.97	train
Cc1cc(COc2ccc(F)c(F)c2F)nc(-c2ccccn2)n1	0.97	train
Cn1cnc(S(=O)(=O)N2C[C@H]3[C@@H](C2)[C@]3(CNC(=O)c2ccccc2Cl)CC2CC2)c1	0.97	train
Cc1onc(C(=O)N2[C@H]3CC[C@@H]2C[C@H](Nc2cc(=O)n(C)c4cc(F)c(F)cc24)C3)c1C	0.97	train
O=c1c2ccccc2c(Cc2ccc(Cl)cc2)nn1C1CCCNCC1	0.97	train
C[C@H](CO)Nc1cc(NS(=O)(=O)N2CCOCC2)nc(SCc2cccc(F)c2F)n1	0.97	train
CC(=O)[C@H]1CC[C@H]2[C@@H]3CCC4=CC(=O)CC[C@]4(C)[C@H]3CC[C@]12C	0.97	train
CN(C)CCOC1=Cc2ccccc2Sc2ccc(Cl)cc21	0.97	train
CC(C)(C)NC(=O)C1CCC2C3CC=C4C=C(C(=O)O)CCC4(C)C3CCC12C	0.97	train
Cc1ccc2nc(N3CCCc4ccc(F)cc4C3)cc(NC3(CN)COC3)c2c1	0.97	train
C#C[C@]1(O)CC[C@H]2[C@@H]3CCC4=CC(=NO)CC[C@@H]4[C@H]3CC[C@@]21CC	0.97	train
Cn1cnc(S(=O)(=O)N2C[C@H]3[C@@H](C2)[C@]3(CNC(=O)c2ccc(Cl)cc2)CC2CC2)c1	0.97	train
CC(C)C[C@@H]1C(=O)N[C@H](C2Cc3ccccc3C2)C(=O)N1[C@@H](C(=O)NC(C)C)c1ccc(C(F)(F)F)o1	0.97	train
C=CC(=O)N1CCCC(n2nc(-c3ccc(Oc4ccccc4)cc3)c3c(N)ncnc32)C1	0.97	train
O=C(O)C1N=C(c2ccccc2)c2cc(Cl)ccc2NC1=O	0.97	train
Cn1nc(C2CC2)c2ccc(Nc3n[nH]c4nccnc34)cc21	0.97	train
COc1ccc(-n2c(CCN3C(=O)c4cccc(OC(C)C)c4C3=O)nc3ccccc3c2=O)cc1	0.97	train
C#C[C@]1(O)CC[C@H]2[C@@H]3CCc4cc(O)ccc4[C@H]3CC[C@@]21C	0.97	train
CN(C)C(=O)C(CCN1CCC(O)(c2ccc(Cl)cc2)CC1)(c1ccccc1)c1ccccc1	0.97	train
CSCCNc1nc(SCCC(F)(F)F)nc2c1ncn2C1OC(COP(=O)(O)OP(=O)(O)C(Cl)(Cl)P(=O)(O)O)C(O)C1O	0.97	train
CC(=O)Nc1cc(Nc2cc(NC3CC3)n3ncc(C#N)c3n2)ccc1Cl	0.97	train
CNC(=O)c1ccc(N2C(=S)N(c3ccc(C#N)c(C(F)(F)F)c3)C(=O)C2(C)C)cc1F	0.97	train
C#C[C@@]1(O)CC[C@H]2[C@@H]3CCC4=CC(=O)CC[C@@H]4[C@H]3CC[C@@]21CC	0.97	train
CC(=O)C1CCC2C3C=CC4=CC(=O)CCC4(C)C3CCC12C	0.97	train
CC12CCC(=O)C=C1C1CC1C1C2CCC2(C)C1C1CC1C21CCC(=O)O1	0.97	train
CC(=O)N1CCN(c2ccc(OCC3COC(Cn4ccnc4)(c4ccc(Cl)cc4Cl)O3)cc2)CC1	0.97	train
OC[C@H]1O[C@H](Oc2ccc(N3CCc4ccccc43)cc2)[C@@H](O)[C@@H](O)[C@@H]1O	0.97	train
CC(=O)C1CCC2C3CCC4=CC(=O)CCC4(C)C3CCC12C	0.97	train
CC(C)C[C@H](NC(=O)[C@H](CCc1ccccc1)NC(=O)CN1CCOCC1)C(=O)N[C@@H](Cc1ccccc1)C(=O)N[C@@H](CC(C)C)C(=O)[C@@]1(C)CO1	0.97	train
CC(=O)Nc1ccc(-c2ccc(Cn3cc(C(=O)O)c(=O)c4cccc(F)c43)nc2)cc1	0.97	train
CN1CCN(C2=c3ccccc3=Nc3ccc(Cl)cc3N2)CC1	0.97	train
C#CC1(O)CCC2C3CCC4=CC(=O)CCC4C3CCC21CC	0.97	train
C#C[C@]1(O)CC[C@H]2[C@@H]3CCC4=CC(=O)CC[C@@H]4[C@H]3CC[C@@]21CC	0.97	train
Cc1ncn(-c2ncc(F)c3c(C(=O)C(=O)N4CCN(C(=O)c5ccccc5)CC4)c[nH]c23)n1	0.97	train
CC(=O)OC1CC2(C)C(CC(O)C3C4(C)CCC(O)C(C)C4CCC32C)C1=C(CCC=C(C)C)C(=O)O	0.97	train
CC12CCC(O)CC1CCC1C2CCC2(C)C(c3ccc(=O)oc3)CCC12O	0.97	train
COc1ccc(CN2[C@H]3C[C@@H]2CN(c2ccc(-c4cc(OCC(C)(C)O)cn5ncc(C#N)c45)cn2)C3)cn1	0.97	train
C[C@H]1[C@H](NC(=O)/C(=N\OC(C)(C)C(=O)O)c2csc(N)n2)C(=O)N1C(=O)NS(=O)(=O)n1nc(-c2cc(=O)c(O)c[nH]2)n(CCCS(=O)(=O)c2ccccc2)c1=O	0.97	train
CCN(CC)CCn1c(=O)nc(-c2ccccc2F)c2cc(Cl)ccc21	0.97	train
C[C@H](N[C@@H](CCc1ccccc1)C(=O)O)C(=O)N1Cc2ccccc2C[C@H]1C(=O)O	0.97	train
Cc1ccc(-c2cc(C(F)(F)F)nn2-c2ccc(S(N)(=O)=O)cc2)cc1	0.97	train
CCOC(=O)[C@H](CCc1ccccc1)N[C@@H](C)C(=O)N1Cc2ccccc2C[C@H]1C(=O)O	0.97	train
CCOC(=O)C(CCc1ccccc1)NC1CCc2ccccc2N(CC(=O)O)C1=O	0.97	train
CC(CCC(=O)O)C1CCC2C3C(O)CC4CC(O)CCC4(C)C3CCC12C	0.97	train
O=C(C(=O)N1CCN(C(=O)c2ccccc2)CC1)c1c[nH]c2c(-n3cncn3)ncc(F)c12	0.97	train
COc1c(C)c2c(c(O)c1C/C=C(\C)CCC(=O)OCCN1CCOCC1)C(=O)OC2	0.97	train
O=C1CN=C(c2ccccc2)c2cc(Cl)ccc2N1	0.97	train
CCOC(=O)C(CCc1ccccc1)NC(C)C(=O)N1Cc2ccccc2CC1C(=O)O	0.97	train
CCNC(=O)Nc1ccc(-c2nc3c(c(N4CCOC[C@@H]4C)n2)CN(c2cnccn2)CC3)cc1	0.97	train
CC[C@@]1(O)C(=O)OCc2c1cc1n(c2=O)Cc2c-1nc1cc(F)c(C)c3c1c2[C@@H](N)CC3	0.97	train
CC(=O)[C@]1(O)Cc2c(O)c3c(c(O)c2[C@@H](O[C@H]2C[C@H](N)[C@H](O)[C@H](C)O2)C1)C(=O)c1ccccc1C3=O	0.97	train
Cn1ncc(C(=O)N2CCC(Nc3cc(=O)n(C)c4ccccc34)CC2)c1Cl	0.97	train
CCc1nnc(NS(=O)(=O)c2ccc(N)cc2)s1	0.97	train
CN1CC(c2nc(C(=O)NCc3ccc(F)cc3S(C)(=O)=O)c(O)c3ncccc23)CC1=O	0.97	train
C=CC(=O)N[C@H]1CCN(c2ccc(C(N)=O)c(Nc3ccc(N4C[C@H](C)O[C@H](C)C4)cc3)n2)C1	0.97	train
CC(=O)O[C@@]12CO[C@@H]1C[C@H](O)[C@@]1(C)C(=O)[C@H](O)C3=C(C)[C@@H](OC(=O)[C@H](O)[C@@H](NC(=O)OC(C)(C)C)c4ccccc4)C[C@@](O)([C@@H](OC(=O)c4ccccc4)[C@@H]12)C3(C)C	0.97	train
C[C@H](Cc1cc2c(c(C(N)=O)c1)N(CCCO)CC2)NCCOc1ccccc1OCC(F)(F)F	0.97	train
NS(=O)(=O)NCCNc1nonc1/C(=N/O)Nc1ccc(F)c(Br)c1	0.969	train
c1cnc(Nc2nc3c(s2)CCCc2n[nH]cc2-3)nc1	0.969	train
C[C@@](C(=O)O[C@H]1C[N+]2(CCCOc3ccc(F)cc3)CCC1CC2)(c1ccccc1)N1CCCCC1	0.969	train
O=C(O)CCc1ccc(C#Cc2cc(Cl)nc(Cl)c2)cc1	0.969	train
N#Cc1cnc2ccc(F)cc2c1N1CCC(C(=O)NCc2ccccc2)CC1	0.969	train
c1cnc2c(Nc3ccc4c(C5CC5)n[nH]c4c3)n[nH]c2c1	0.969	train
C[C@@H](Oc1cc(-n2cnc3ccc(O[C@H]4CCCN(C)CC4)cc32)sc1C(N)=O)c1ccccc1Cl	0.969	train
COc1ccc(CN2CCO[C@H](COc3ccccc3)C2)cc1F	0.969	train
Cn1nc(-c2cnc(N)c(-c3nnc(C(C)(C)C)o3)n2)nc1C1(c2ccccc2)CC1	0.969	train
Cc1ccc(-c2cc(-c3ccc(S(C)(=O)=O)cc3)cnc2N)cc1C(F)(F)F	0.969	train
O=C(O)CCn1c(=O)oc2cc(OC3CC3)c(Cl)cc21	0.969	train
C=CC(=O)Nc1cc(Nc2ncc(Cl)c(-c3cnn4ccccc34)n2)c(OC)cc1N(C)CCN(C)C	0.968	train
Cn1cc(C(=O)O)c2ccc(N3CCC(OCc4c(-c5c(Cl)cccc5Cl)noc4C4CC4)CC3)cc21	0.968	train
Cc1nc(-c2ccc(C)c(NC(=O)c3ccc(OCc4ccccn4)cc3)c2)c[nH]1	0.968	train
COc1ccc(CNC(=O)c2cc(-c3cc(Cl)cc(Cl)c3)cnc2-c2cccnc2)cc1OC	0.968	train
O=C(COc1cccc(Cl)c1)NC1CCN(Cc2ccn(-c3ccc(OC(F)(F)F)cc3)c2)CC1	0.968	train
Cc1cn([C@H]2CCCN([C@H](CC(C)(C)C)c3ccc(C(=O)O)c(Oc4cccc(Br)c4)c3)C2)c(=O)[nH]c1=O	0.968	train
CN(C)Cc1nccn1-c1ccc(N2CCC(NS(=O)(=O)c3cc4ccc(Cl)cc4s3)C2=O)c(F)c1	0.968	train
CCCCNc1cc(C(=O)O)cc(S(N)(=O)=O)c1Oc1ccccc1	0.968	train
N#Cc1cccnc1N1CCN(C(=O)c2cccc(Cc3n[nH]c(=O)c4ccccc34)c2)CC1	0.968	train
Cc1nccnc1-c1ccc(CC(=O)N[C@H](C)c2ccc(OCC(F)(F)F)cn2)cc1	0.968	train
COc1cc(C(=O)Nc2ccc(NC(=O)c3ccccn3)cc2)cc(-c2nn[nH]n2)c1	0.968	train
C[C@]1(O)CCN(c2c(C#N)c(C(F)(F)F)nc3cc[nH]c23)C1	0.968	train
CC(C)(C)OC(=O)NC[C@H]1CC[C@H](CNC(=O)c2cc(N3CCC(CCN4CC(O)C4)CC3)nc3ccccc23)CC1	0.967	train
CSc1nc2cc(Cl)c(Oc3cccc(Cl)c3Cl)cc2[nH]1	0.967	train
Cc1ccc(-c2ncc(CN3CCOCC3)s2)cc1NC(=O)c1ccc(OCc2ccccn2)cc1	0.967	train
O=C(O)c1cn(Cc2ccc3ccccc3c2)c2cccc(F)c2c1=O	0.967	train
COCCCN1CCN([C@H]2CC[C@H](n3nc(-c4ccc5nc(Cc6ccccc6OC)[nH]c5c4)c4c(N)ncnc43)CC2)CC1	0.967	train
COc1c(C)cnc(Cn2cc(C#CCC(C)(C)O)c3c(Cl)nc(N)nc32)c1C	0.967	train
CN1CC[C@H](c2c(O)cc(O)c3c(=O)cc(/C=C/c4c(Cl)cccc4Cl)oc23)[C@H](O)C1	0.967	train
O=C(CCn1cnc([N+](=O)[O-])n1)Nc1cccc(-c2ccccc2)c1	0.967	train
N#Cc1cc(Cl)cc(Oc2c(Cl)ccn(Cc3n[nH]c4ncccc34)c2=O)c1	0.967	train
O=C1CCc2ccccc2N1CCCN1CCN(c2ccccc2)CC1	0.967	train
CC(Nc1cccc(Cl)c1F)c1cc(C(=O)NCCN(C)C)cn2c(=O)cc(N3CCOCC3)nc12	0.967	train
CN(C)CCCN1c2ccccc2CCc2ccc(Cl)cc21	0.966667	train
COc1cc(-c2ccncc2)cc2cnc(Nc3ccc([C@@H](C)NC(C)=O)cc3)nc12	0.966	train
C[C@@H](NC(=O)[C@H]1CCCCN1CCO)c1ccc(Nc2ncc3cc(-c4ccncc4)ccc3n2)cc1	0.966	train
C[C@@H](NC(=O)C1CCNCC1)c1ccc(Nc2ncc3cc(-c4ccncc4)ccc3n2)cc1	0.966	train
C[C@@H](Oc1cc(-n2cnc3ccc(OC4CCNCC4)cc32)sc1C(N)=O)c1ccccc1C(F)(F)F	0.966	train
CC1CCCCC1C(=O)N1CC(c2nc(-c3cccc(F)c3)no2)C1	0.966	train
C[C@H](c1ccc(F)cc1)N1C(=O)O[C@](Cc2ccccc2)(c2nc3cc(NS(C)(=O)=O)ccc3[nH]2)C1=O	0.966	train
CCc1cccc(NC(=O)c2cc(Oc3cncnc3)cc(C)n2)n1	0.966	train
CN1CCc2ccc(-c3cnc4[nH]cc(C(=O)c5ccccc5Cl)c4c3)cc2C1	0.966	train
N=C(NCCCOc1ccc(F)cc1)Nc1ccc(I)cc1	0.966	train
CC(C)(C)[C@@H](NC(=O)c1c[nH]c2ncc(C3CC3)nc12)C(=O)N1CC(C#N)C1	0.966	train
CCOC(=O)N1CCN(C(=O)[C@H](CCC(=O)O)NC(=O)c2cc([C@H]3C[C@@H]3COC)nc(-c3ccccc3)n2)CC1	0.966	train
CCC(C)CC(C)CCCCCCCCC(=O)NC1CC(O)C(NCCN)NC(=O)C2C(O)CCN2C(=O)C(C(O)CCN)NC(=O)C(C(O)C(O)c2ccc(O)cc2)NC(=O)C2CC(O)CN2C(=O)C(C(C)O)NC1=O	0.965	train
COCCOc1cc(F)c2c(Nc3ccc(NC(=O)Cn4cc(C(C)C)nn4)cc3)ncnc2c1	0.965	train
O[C@H]1CNCCC[C@@H]1n1c2ccc(C(F)(F)F)cc2c2cc(C(F)(F)F)ccc21	0.965	train
O=[N+]([O-])c1cn2c(n1)O[C@@H](COc1ccc(-c3ccc(F)cc3)nc1)CC2	0.965	train
O=C(Nc1c(Cl)c[n+]([O-])cc1Cl)c1ccc(OC(F)F)c(OCC2CC2)c1	0.965	train
CN1CCc2cc(-c3cnc4[nH]cc(C(=O)c5ccccc5Cl)c4c3)ccc2C1	0.965	train
c1ccc(OC[C@@H]2CN(Cc3ccc4[nH]ccc4c3)CCO2)cc1	0.965	train
CN1CCc2nc(C#Cc3ccccc3)sc2C1	0.965	train
O=C(Nc1ncc(C2(O)CCC2)s1)c1ccc(F)c(Cl)c1	0.965	train
NC(=O)c1cncc(-c2ccc([C@H]3CC[C@H](CC(=O)O)CC3)cc2)n1	0.965	train
c1ccc(Nc2nc(-c3cn[nH]c3)cs2)nc1	0.965	train
Cc1noc2c(F)c3c(cc12)CC1(C(=O)NC(=O)NC1=O)[C@@H]1[C@@H](C)O[C@@H](C)CN31	0.965	train
CC1(C)Cc2c(sc(NC(=O)Nc3ccc(Cl)cc3)c2C(N)=O)C(C)(C)N1	0.965	train
C[C@@H](NC1=CC(=O)CNC1)c1ccc(Nc2ncc3cc(-c4ccncc4)ccc3n2)cc1	0.964	train
O=C(O)c1ccc(Sc2ncc(CN3CCC(N4C(=O)N(C5CCOCC5)C[C@H]4c4cccc(Cl)c4)CC3)cn2)cc1	0.964	train
c1cnc(Nc2nc3c(s2)CCc2n[nH]cc2-3)nc1	0.964	train
Cc1ccc(NC(=O)c2cccc(N3CCOCC3)c2)cc1NC(=O)c1ccc(OCc2ccccn2)cc1	0.964	train
CN1CCN(CC(=O)Nc2ccc(-c3cccc4c(=O)cc(N5CCOCC5)oc34)c3sc4ccccc4c23)CC1	0.964	train
COc1ccc2ncc(F)c([C@@H](O)CC[C@@H]3CCN(C4CC(c5cc(F)ccc5F)C4)C[C@@H]3C(=O)O)c2n1	0.964	train
Nc1cccc(-c2ccc(Cn3cc(C(=O)O)c(=O)c4cccc(F)c43)cc2)c1	0.964	train
Nc1ncnc2c1C(=O)N(c1ccc(-c3ccccc3Cl)cc1)CCO2	0.964	train
CCCNC(=O)NS(=O)(=O)c1ccc(Cl)cc1	0.963333	train
C[C@@](N)(CCc1ccc(-c2nc3ccc(C4(c5ccccc5)CC4)nc3s2)c(F)c1)C(=O)O	0.963	train
COc1ccc2c(CN3CCO[C@H](COc4ccccc4)C3)c[nH]c2c1	0.963	train
CC(C)NC(=O)[C@H]1CC[C@@H](n2/c(=N/C(=O)c3cc(F)cc(F)c3)[nH]c3ccc(CN4CCC(C(C)(C)O)CC4)cc32)CC1	0.963	train
CN(C)Cc1nccn1-c1ccc(N2CCC(NS(=O)(=O)c3cc4cc(Cl)ccc4s3)C2=O)c(F)c1	0.963	train
CCN1CCN(Cc2ccc(Nc3ncc(F)c(-c4cc(F)c5nc(C)n(C(C)C)c5c4)n3)nc2)CC1	0.963	train
C[C@H](CO)Nc1cc(NS(=O)(=O)N2CCNCC2)nc(SCc2cccc(Cl)c2F)n1	0.963	train
Cc1ccc(O)c([C@H](CCN(C(C)C)C(C)C)c2ccccc2)c1	0.963	train
CC[C@H](C)C(=O)N1CCC(NC(=O)Nc2ccc(C(F)(F)F)cc2)CC1	0.963	train
CCOC(=O)[C@H](CCc1ccccc1)N[C@H]1CCc2ccccc2N(CC(=O)O)C1=O	0.963	train
Cc1cc(NC(=O)C2=C(O)c3ccccc3S(=O)(=O)N2C)no1	0.9625	train
O=C1CCc2cc(OCCCCc3nnnn3C3CCCCC3)ccc2N1	0.9625	train
COC(=O)Nc1ccc2c(c1)NC(=O)CCCCC[C@H](NC(=O)/C=C/c1cc(Cl)ccc1-n1cnnn1)c1nc-2c[nH]1	0.962	train
CCOc1ccc(Cc2cc([C@@H]3S[C@H](CO)[C@@H](O)[C@H](O)[C@H]3O)c(OC)cc2C)cc1	0.962	train
COCc1cnc(N2CCC([C@H]3C[C@H]3CCOc3cc(F)c(CC(=O)N4CCC4)c(F)c3)CC2)nc1	0.962	train
NS(=O)(=O)NCCNc1nonc1/C(=N/O)Nc1ccc(F)c(Cl)c1	0.962	train
Cc1noc(C)c1S(=O)(=O)Nc1c(N2CCC(N(C)Cc3ccc(Cl)cc3)CC2)c(=O)c1=O	0.962	train
Cc1ccccc1C1(C#N)CCN(Cc2cc(C(=O)O)c(=O)n3ccccc23)CC1	0.962	train
CS(=O)(=O)c1ccc(-c2cnc(N)c(-c3ccc(C(F)(F)F)cc3)c2)cc1	0.962	train
O=[N+]([O-])c1ccc(C2=NOC(c3ccc(N4CCOCC4)cc3)C2)o1	0.962	train
C=CC(=O)Nc1cc(Nc2nccc(-c3cn(C)c4ccccc34)n2)c(OC)cc1N(C)CCNC	0.961	train
O=C(N[C@@H]1CCC[C@@H](NC(=O)c2cccc(Cl)c2)C1)c1cccc(F)c1	0.961	train
C[C@@H]1CN(c2ccc3c(Nc4ccc(Cl)c(-c5ncc(-c6ccccc6)[nH]5)c4)nccc3n2)CCO1	0.961	train
Cc1ccc([C@H]2C[C@@H](C(F)(F)F)n3ncc(C(=O)NCc4ccc(F)cc4)c3N2)nc1	0.961	train
Cn1ncc2cc(CN3CCO[C@H](COc4ccccc4)C3)ccc21	0.961	train
N#CC1(NC(=O)[C@H](Cc2ccc(OC(F)(F)F)c(Cl)c2)NC(=O)c2cnn(-c3cccnc3)n2)CC1	0.9605	train
CCC(C)CC(C)CCCCCCCCC(=O)N[C@H]1C[C@@H](O)[C@@H](NCCN)NC(=O)[C@@H]2[C@@H](O)CCN2C(=O)[C@H]([C@H](O)CCN)NC(=O)[C@H]([C@H](O)[C@@H](O)c2ccc(O)cc2)NC(=O)[C@@H]2C[C@@H](O)CN2C(=O)[C@H]([C@@H](C)O)NC1=O	0.96	train
CNC(=O)c1ccc(-c2cnc3ncc(Cc4ccc5ncccc5c4)n3n2)cc1F	0.96	train
Cc1cc(C(=O)O)ccc1-c1ccc(N2C(=O)N(c3ccncn3)C3(CCN(Cc4ncccc4C)CC3)C2=O)cc1	0.96	train
CCC[C@H]1N(C(=O)c2cnccc2C(F)(F)F)CCC[C@@]1(Oc1csc(C(F)(F)F)c1)C(=O)N1CCN(c2ccccc2OCCCC(=O)O)CC1	0.96	train
O=C(Nc1nc(-c2cc(Cl)cs2)c(N2CCN(C3CCCCC3)CC2)s1)c1cnc(N2CCC(C(=O)O)CC2)c(Cl)c1	0.96	train
CCCc1nn(C)c2c(=O)nc(-c3cc(S(=O)(=O)N4CCN(C)CC4)ccc3OCC)[nH]c12	0.96	train
Cc1ccsc1C(=CCCN1CCC[C@@H](C(=O)O)C1)c1sccc1C	0.96	train
Cc1cc(Oc2nccc3occc23)ccc1-c1c(C)ncc2nccn12	0.96	train
C[C@H](c1ccc(F)cc1)N1C(=O)O[C@](Cc2ccccc2)(c2nc3cc(-c4cc[nH]n4)ccc3[nH]2)C1=O	0.96	train
CNC(=O)c1ccc(N2C(=S)N(c3cnc(C#N)c(C(F)(F)F)c3)C(=O)C23CCC3)cc1F	0.96	train
N#Cc1ccc(OCCCN2CCC(C(O)(c3cccc(F)c3)c3nccs3)CC2)cc1	0.96	train
C#CC1(O)CCC2C3CCC4=CCCCC4C3CCC21C	0.96	train
OC[C@H]1C[C@@H](O)CCN1CCc1ccc(Nc2nc(-c3ccc(C(F)(F)F)cc3)cs2)cc1	0.96	train
Cn1cnc(S(=O)(=O)N2C[C@H]3[C@@H](C2)[C@]3(CNC(=O)c2cccc(C(F)(F)F)c2)CC2CC2)c1	0.96	train
Cc1ccc([C@H](C(=O)NC(C)C)N2C(=O)[C@@H](C3Cc4ccccc4C3)NC(=O)[C@H]2CC(C)C)o1	0.96	train
Cc1onc(-c2c(Cl)cccc2Cl)c1C(=O)N[C@@H]1C(=O)N2[C@@H](C(=O)O)C(C)(C)S[C@H]12	0.96	train
COc1cccc2c1c(NS(=O)(=O)c1ccc(Cl)s1)nn2Cc1cccc(CNC(=O)C(C)(C)N)c1	0.96	train
Cc1onc(-c2c(Cl)cccc2Cl)c1C(=O)NC1C(=O)N2C1SC(C)(C)C2C(=O)O	0.96	train
COC(O)=C1C(C)=NC(C)=C(C(=O)OC(C)C)C1c1cccc2nonc12	0.96	train
O=C(c1n[nH]c2ncccc12)N1CCc2nc(COc3ccccc3)oc2C1	0.96	train
Cc1onc(-c2c(F)cccc2Cl)c1C(=O)NC1C(=O)N2C1SC(C)(C)C2C(=O)O	0.96	train
O=C1Nc2ccc(Cl)cc2C(c2ccccc2)=N[C@H]1O	0.96	train
Cc1ccc(O)c(C(CCN(C(C)C)C(C)C)c2ccccc2)c1	0.96	train
CCOc1ccccc1OCCNC(C)Cc1ccc(OC)c(S(N)(=O)=O)c1	0.96	train
C[C@H](NC(=O)CO)[C@H](Oc1ccc2c(cnn2-c2ccc(F)cc2)c1)c1ccc(S(C)(=O)=O)cc1	0.96	train
COCCNc1nc2ccc(C#CC3(O)CCCCC3)cc2n1-c1ccnc(N)n1	0.96	train
CN=C1CN(O)C(c2ccccc2)=c2cc(Cl)ccc2=N1	0.96	train
O=C1NC(c2ccccc2)(c2ccccc2)C(=O)N1COP(=O)(O)O	0.96	train
O=C(O)CCn1c(=O)oc2cc(OCC3CC3)c(Cl)cc21	0.96	train
O=C(N[C@@H](CC1CCCCC1)C(=O)N[C@@H](C[C@@H]1CCNC1=O)C(O)S(=O)(=O)O)OCc1cccc(Cl)c1	0.96	train
CCCNCC(O)COc1ccccc1C(=O)CCc1ccccc1	0.96	train
Cc1ccc2c(-c3cnc4[nH]cc(C(=O)NC5(C)CCNC5)c4n3)nn(C)c2c1	0.96	train
O=C1Nc2ccc(Cl)cc2C(c2ccccc2)=NC1O	0.96	train
O=C(O)c1cc(CN2CCc3ccccc3C2c2ccncc2)c2ccccn2c1=O	0.96	train
C[C@@](O)(CS(=O)(=O)c1ccc(F)cc1)C(=O)Nc1ccc(C#N)c(C(F)(F)F)c1	0.96	train
COc1ccc(CCNCC(O)COc2cccc(C)c2)cc1OC	0.96	train
C#CC1(O)CCC2C3C(C)CC4=C(CCC(=O)C4)C3CCC21C	0.96	train
O=C(NC[C@@H](O)CN1CCC(Oc2ccc(Cl)c(Cl)c2)CC1)c1c[nH]nc1C1CC1	0.96	train
NS(=O)(=O)c1cc(-c2nn[nH]n2)c(NCc2cccs2)cc1Cl	0.96	train
Cc1nc(Nc2ncc(C(=O)Nc3c(C)cccc3Cl)s2)cc(N2CCN(CCO)CC2)n1	0.96	train
COc1cc2c(cc1OC)C(=O)[C@@H](CC1CCN(Cc3ccccc3)CC1)C2	0.96	train
COC(=O)c1ccc(-c2ccc(Cl)c(O[C@H]3O[C@H](CO)[C@@H](O)[C@H](O)[C@@H]3O)c2)cc1	0.96	train
Cc1c(Cl)ccc(OC2CCN(C[C@H](O)CNC(=O)c3c[nH]c(=O)cc3C(F)(F)F)CC2)c1Cl	0.96	train
CCC(C)C(=O)OC1CC(C)C=C2C=CC(C)C(CCC(O)CC(O)CC(=O)O)C21	0.96	train
COc1ccc2c(ccn2-c2ccc(O[C@H]3O[C@H](CO)[C@@H](O)[C@H](O)[C@@H]3O)c(Cl)c2)c1	0.96	train
OC1(c2ccc(F)cc2)CCN(c2ccc3nnc(C(F)(F)F)n3n2)CC1	0.96	train
CC(O)(CS(=O)(=O)c1ccc(F)cc1)C(=O)Nc1ccc(C#N)c(C(F)(F)F)c1	0.96	train
Cc1cc(Cl)ccc1OC1CCN(C[C@H](O)CNC(=O)c2c[nH]nc2C(F)(F)F)CC1	0.96	train
Cn1cc2cc(-c3cc(F)c(Cn4c(=O)cnc5ncccc54)c(F)c3)ccc2n1	0.96	train
CNCCC(Oc1ccccc1C)c1ccccc1	0.96	train
CCOC(=O)C(C)(C)Oc1ccc(Cl)cc1	0.96	train
Cn1cc(-c2ccc(Cc3cc(C(=O)N[C@@H]4CCCC[C@H]4O)nc4c3ccn4C)cn2)cn1	0.96	train
Cn1cc(-c2ccc(Cc3cc(C(=O)NC4CCOCC4)nc4c3ccn4C)cn2)cn1	0.96	train
OCc1cc(C(O)CNCCCCCCOCCCCc2ccccc2)ccc1O	0.96	train
C[C@H]1[C@H](NC(=O)/C(=N\OC(C)(C)C(=O)O)c2csc(N)n2)C(=O)N1C(=O)NS(=O)(=O)n1nc(-c2cc(=O)c(O)c[nH]2)n(CCC2(S(C)(=O)=O)CC2)c1=O	0.96	train
Cc1ccc(-c2ccc(C(=O)NC(CN)c3ncc(CO)s3)[nH]2)cc1F	0.96	train
NCc1cc(Oc2cccc(C(=O)Nc3ccccc3)c2)nc(C(F)(F)F)c1	0.96	train
CCN1CC(c2nc(C(=O)NCc3ccc(F)cc3S(C)(=O)=O)c(O)c3ncccc23)CC1=O	0.96	train
Nc1ncnc2c1C(=O)N(c1ccc(-c3c(F)cccc3F)c(F)c1)CCO2	0.96	train
OCc1cc([C@H](O)CNCCCCCCOCCCCc2ccccc2)ccc1O	0.96	train
CC(C)Cc1ccc(C(C)C(=O)NC(C)C(=O)O)cc1	0.96	train
CNC(=O)c1nnc2ccc(-c3ccc(OCCCN(C)C)nc3)cc2c1N[C@@H](C)C1CCOCC1	0.96	train
COC1C(C)OC(OC2C=C3CCC4C(CCC5(C)C(c6ccc(=O)oc6)CCC45O)C3(C)CC2)C(O)C1O	0.96	train
CC(=O)O[C@H]1C[C@@]2(C)[C@@H](C[C@@H](O)[C@H]3[C@@]4(C)CC[C@@H](O)[C@@H](C)[C@@H]4CC[C@@]32C)/C1=C(\CCC=C(C)C)C(=O)O	0.96	train
Cn1cc2c(-c3cc(F)c(CN4C=CC5=NCCN5C4=O)c(F)c3)cccc2n1	0.96	train
COC(=O)C1C2CC3c4[nH]c5cc(OC)ccc5c4CCN3CC2CC(OC(=O)c2cc(OC)c(OC)c(OC)c2)C1OC	0.96	train
C[C@H]1[C@H](NC(=O)/C(=N\OC(C)(C)C(=O)O)c2csc(N)n2)C(=O)N1C(=O)NS(=O)(=O)n1nc(-c2cc(=O)c(O)c[nH]2)n(C[C@@H](O)CS(C)(=O)=O)c1=O	0.96	train
CN1C(=O)[C@@H](O)N=C(c2ccccc2)c2cc(Cl)ccc21	0.96	train
CC(C)(C)NC(=O)c1c[nH]c2ncc(-c3ncn4c3CCCC4)nc12	0.96	train
CC#Cc1cncc(-c2cc(Cl)c([C@]3(C)CC(=O)N(C)C(=N)N3)s2)c1	0.96	train
NC(=O)c1ncc(F)c2c(C(=O)C(=O)N3CCN(C(=O)c4ccccc4)CC3)c[nH]c12	0.96	train
C[C@H]1O[C@@H](n2cnc3c(N)nc(OCC4CC45CC5)nc32)[C@H](O)[C@H]1Cl	0.96	train
COc1cc(C2c3cc4c(cc3C(OC3OC5COC(C)OC5C(O)C3O)C3COC(=O)C23)OCO4)cc(OC)c1O	0.96	train
COc1ccc2ncc(=O)n(CCN3CC[C@H](NCc4ccc5c(n4)NC(=O)CO5)[C@@H](F)C3)c2c1	0.96	train
C[C@H]1[C@H](NC(=O)/C(=N\OC(C)(C)C(=O)O)c2csc(N)n2)C(=O)N1C(=O)NS(=O)(=O)n1nc(-c2cc(=O)c(O)c[nH]2)n(C[C@@H](O)CO)c1=O	0.96	train
CSc1ccc(C=C2C(C)=C(CC(=O)O)c3cc(F)ccc32)cc1	0.9595	train
CC(=O)Nc1ccc2ccn(-c3cc(NCCCCO)n4ncc(C#N)c4n3)c2c1	0.959	train
C[C@@H]1CN(c2nnc(C(F)(F)F)o2)CCN1c1ncc(OCc2ccncc2C#N)cn1	0.959	train
Cc1noc2c1-c1sc(C)c(C)c1C(c1ccc(C#N)cc1)=N[C@H]2CC(N)=O	0.959	train
Cc1cccc(Cl)c1-c1ccc(N2CCOc3ncnc(N)c3C2=O)cc1	0.959	train
CC(=O)Nc1cccc(-c2ccc(Cn3cc(C(=O)O)c(=O)c4cccc(F)c43)nc2)c1	0.959	train
O=C(N[C@@H]1CC[C@@H](c2cccc(F)c2F)CN(CC(F)(F)F)C1=O)N1CCC(n2c(O)nc3ncccc32)CC1	0.959	train
CCN1CCc2c(sc(NC(=O)Nc3ccc(Cl)cc3)c2C(N)=O)C1	0.959	train
O=C(O)C[C@@H]1O[C@@H](c2cccc(Cl)c2)[C@@H](c2ccc(Cl)cc2)N(CC2CC2)C1=O	0.958	train
Cc1cc(C(=O)N[C@H]2CC[C@@H](NC(=O)c3cc(F)cnc3Oc3cccc(-c4ccc(CCN5CCC(N6CCCC6)CC5)cc4)c3)CC2)nn1C	0.958	train
Cc1ccc(S(=O)(=O)Nc2c(C(=O)N[C@@H](C)C(C)(C)C)c(C)nn2-c2ccccc2)cc1	0.958	train
O=C(Nc1cc(-c2cc3c([nH]2)C2(CCNCC2)CNC3=O)ccn1)c1cccc(OC(F)(F)F)c1	0.958	train
CC(C)N(C)Cc1nccn1-c1ccc(N2CCC(NS(=O)(=O)/C=C/c3ccc(Cl)s3)C2=O)c(F)c1	0.958	train
COCCOc1ccc(-c2ccc(COc3ncccc3C(N)=O)nc2)c(C)c1	0.958	train
Cc1cc(NC(=O)c2cnn3cccnc23)n(-c2cccc(Cl)c2)n1	0.958	train
CCOc1cc2oc(=O)n(CCC(=O)O)c2cc1Cl	0.958	train
CNc1nc2ccccc2n1-c1nc(N2CCOC[C@H]2C)cc(C2([S@](C)(=N)=O)CC2)n1	0.957	train
Cc1nc(Oc2ccc(C(=O)O)cc2)ccc1CN1CCC(N2C(=O)N(C3CCOCC3)C[C@H]2c2cccc(Cl)c2)CC1	0.957	train
Cc1ccc([C@H]2C[C@@H](C(F)F)n3ncc(C(=O)NCc4ccc(F)cc4)c3N2)nc1	0.957	train
Cc1cccc([C@@H]2CN(C3CCOCC3)C(=O)N2C2CCN(Cc3ccc(Oc4ccc(C(=O)O)cc4)nc3C)CC2)c1	0.957	train
Cc1cc2c(cc1N1C(=O)c3cccc4c(CCCO)ccc(c34)C1=O)n(C)c(=O)n2C	0.957	train
O=C1c2ccccc2-n2c1nc1c(c2=O)CCCC1	0.957	train
CCCCNC(=O)NS(=O)(=O)c1ccc(C)cc1	0.956667	train
C[C@@](C(=O)O[C@H]1C[N+]2(CCCc3ccc4ncsc4c3)CCC1CC2)(c1ccccc1)N1CCCCC1	0.956	train
CC(C)Nc1nc2c(C(=O)N(C)C)c(Cl)c(Cl)cc2n1C1CCN(c2ccc(C(C)(C)C#N)cc2)CC1	0.956	train
C[C@@](C(=O)O[C@H]1C[N+]2(CCOc3ccccc3)CCC1CC2)(c1ccccc1)N1CCCCC1	0.956	train
CC(=O)NCCNc1nonc1/C(=N/O)Nc1ccc(F)c(Br)c1	0.956	train
Cc1cc2ccc1[C@@H](C)COC(=O)Nc1ccc(C3(C(=O)O)CC3)c(c1)CN(C)C(=O)[C@@H]2Nc1ccc2c(N)ncc(F)c2c1	0.956	train
O=C(O)c1cn(Cc2ccc(-c3cn[nH]c3)cc2F)c2cccc(F)c2c1=O	0.956	train
N#Cc1ccc(CN2CCN(c3ccc4nnc(C(F)(F)F)n4n3)CC2)cc1	0.956	train
CNC1=Nc2ccc(Cl)cc2C(c2ccccc2)=[N+]([O-])C1	0.955	train
Cc1cc(C(=O)N[C@H]2CC[C@@H](NC(=O)c3cc(F)cnc3Oc3cccc(-c4ccc(CCCN5C[C@H](C)N[C@H](C)C5)cc4)c3)CC2)nn1C	0.955	train
Cc1c(-c2ccc(N3CCC[C@H]3CO)cc2)[nH]c2cc(F)cc(F)c2c1=O	0.955	train
Cc1ccc(C(SC[C@H](N)C(=O)O)(c2ccccc2)c2ccccc2)cc1C	0.955	train
C[C@H]1CN(Cc2ccc(-c3cccc(Oc4ncc(F)cc4C(=O)N[C@H]4CC[C@@H](NC(=O)c5cc6ccccn6n5)CC4)c3)cc2)C[C@@H](C)N1	0.955	train
COC(=O)C1=C(C)NC(C)=C(C(=O)OC)C1c1ccccc1[N+](=O)[O-]	0.955	train
Cc1csc(C(=O)N[C@H]2CC[C@@H](NC(=O)c3cc(F)cnc3Oc3cccc(-c4ccc(CN5C[C@H](C)N[C@H](C)C5)cc4CN4CCOCC4)c3)CC2)n1	0.955	train
Cc1cc(-c2cnn(C)c2)cc(C2CCN(C(=O)c3cc(C(C)C)n[nH]3)C2)n1	0.955	train
O=C(O)c1cn(Cc2ccc(-c3ccc(Cl)nc3)nc2)c2c(F)cccc2c1=O	0.955	train
CS(=O)(=O)c1cccc(-c2ccc(Cn3cc(C(=O)O)c(=O)c4cccc(F)c43)nc2)c1	0.955	train
Nc1cccc(-c2ccc(Cn3cc(C(=O)O)c(=O)c4cccc(F)c43)nc2)c1	0.955	train
CCS(=O)(=O)c1ccc(-c2cc(C(F)(F)F)ccc2OCC(=O)O)c(C)c1	0.954	train
Cc1cc(C(=O)O)ccc1-c1ccc(N2C(=O)N(c3cnccn3)C3(CCN(Cc4ncccc4C)CC3)C2=O)cc1	0.954	train
CO[C@H]1O[C@@H]2O[C@@]3(C)CC[C@H]4[C@H](C)CC[C@@H]([C@H]1C)[C@]42OO3	0.954	train
C[C@H](CO)CN1[C@H](C)Cc2c([nH]c3ccccc23)[C@H]1c1ccc(/C=C/C(=O)O)cc1	0.954	train
Cc1nc(C)c(-c2ccc([C@H]3CC[C@H](CC(=O)O)CC3)cc2)nc1C(N)=O	0.953	train
COc1c(F)cccc1C1CCN(c2ccn3c(CC(F)(F)F)nnc3c2C#N)CC1	0.953	train
COc1cc2ncnc(Nc3cccc(Cl)c3F)c2cc1OC1CCN(CC(N)=O)CC1	0.953	train
O=C1NCCc2nc(OCc3cccc(F)c3)ccc21	0.953	train
O=C(O)CN1C(=O)[C@@H](N[C@@H](CCc2ccccc2)C(=O)O)CCc2ccccc21	0.953	train
Nc1ccc(-c2ccc(Cn3cc(C(=O)O)c(=O)c4cccc(F)c43)cc2)cn1	0.953	train
CC(C)(C)c1cc(NC(=O)NC2C3CC4CC(C3)CC2C4)no1	0.952	train
O=C(Nc1ccc(N(Cc2ccsc2)C(=O)Cn2nnc3ccccc32)cc1)C1CC1	0.952	train
CC1(C#N)CN(c2cc(COc3ccc(F)c(F)c3F)nc(-c3ccccn3)n2)C1	0.952	train
C[C@H](NCc1c(C(=O)N[C@@H]2CCC[C@H](O)C2)noc1-c1ccc(C(F)(F)F)cc1)C(F)(F)F	0.952	train
NC(=O)n1cc(NC(=O)N2[C@H](C(=O)Nc3cccc(C(F)(F)F)n3)C[C@H]3C[C@H]32)c2ccccc21	0.952	train
Cc1cccc(C2(C#N)CCN(Cc3cc(C(=O)O)c(=O)n4ccccc34)CC2)c1	0.952	train
C[C@@](CCn1cc(-c2ccccc2)cn1)(C(=O)NO)S(C)(=O)=O	0.952	train
O=C(O)CN1C(=O)C(NC(CCc2ccccc2)C(=O)O)CCc2ccccc21	0.9515	train
COCc1cnc(N2CCC([C@H]3C[C@H]3COCc3ccc(S(C)(=O)=O)cc3F)CC2)nc1	0.951	train
Cc1cc(Oc2cncnc2)cc(C(=O)Nc2ccc(Cl)cn2)n1	0.951	train
Cc1noc(C)c1S(=O)(=O)Nc1c(N2CCN(CCc3ccccc3)CC2)c(=O)c1=O	0.951	train
O=C(Nc1ccc(C(F)(F)F)cc1)NC1CCN(C(=O)C2CC2)CC1	0.951	train
O=C(O)c1cc(CN2CCN(c3ccc(C(F)(F)F)cc3)CC2)c2ccccn2c1=O	0.951	train
Cc1ccc(F)cc1Cn1c(N2CCC[C@@](C)(N)C2)cc2c1c(=O)n(C)c(=O)n2C	0.951	train
O=C(Nc1ccnc(NC(=O)C2CC2)c1)c1c(Cl)cccc1Cl	0.9505	train
CC1(C)C(=CC=CC=CC=CC2=[N+](CCCCS(=O)(=O)O)c3ccc4ccccc4c3C2(C)C)N(CCCCS(=O)(=O)O)c2ccc3ccccc3c21	0.95	train
C[C@@H](NCCCc1cccc(C(F)(F)F)c1)c1cccc2ccccc12	0.95	train
CC(NCCCc1cccc(C(F)(F)F)c1)c1cccc2ccccc12	0.95	train
CC(CC1c2ccccc2CCc2ccccc21)CN(C)C	0.95	train
CCC(=O)OC(OP(=O)(CCCCc1ccccc1)CC(=O)N1CC(C2CCCCC2)CC1C(=O)O)C(C)C	0.95	train
Cc1ccc(NC(=O)c2ccc(CN3CCN(C)CC3)cc2)cc1Nc1nccc(-c2cccnc2)n1	0.95	train
CC(C)COc1ccc(CNC(=O)N(Cc2ccc(F)cc2)C2CCN(C)CC2)cc1	0.95	train
CCCc1nc(C)c2c(O)nc(-c3cc(S(=O)(=O)N4CCN(CC)CC4)ccc3OCC)nn12	0.95	train
O=C(c1ccc(F)c(F)c1Nc1ccc(I)cc1F)N1CC(O)([C@@H]2CCCCN2)C1	0.95	train
C[C@@H](CN(C)C)CN1c2ccccc2CCc2ccccc21	0.95	train
CNCCCCOc1ccccc1Cc1ccccc1	0.95	train
O=C(c1ccc(F)c(F)c1Nc1ccc(I)cc1F)N1CC(O)(C2CCCCN2)C1	0.95	train
Cc1ccc(C(=O)NC2CC2)cc1NC(=O)c1ccc(-c2ccc(C(=O)N3CCCCC3)cc2)s1	0.95	train
CN(C(=O)c1ccccc1Br)c1cccc(NC(=O)C2CCCC2)c1	0.95	train
CC(=O)NC(C)c1ccc(Nc2ncc3cc(-c4ccncc4)ccc3n2)cc1	0.95	train
Fc1ccc(C(c2ccc(F)cc2)N2CCN(CC=Cc3ccccc3)CC2)cc1	0.95	train
COc1cc(N2CC3CN(CCO)CC(C2)O3)ccc1Nc1ncc(Cl)c(-c2cnc3ccccn23)n1	0.95	train
COc1ncnc(Cn2cc(C(=O)NCC3CC3)c3ncccc32)c1C	0.95	train
COC(=O)C1=C(C)NC(C)=C(C(=O)OCCN(C)Cc2ccccc2)[C@H]1c1cccc([N+](=O)[O-])c1	0.95	train
CCCCC(=O)N(Cc1ccc(-c2ccccc2-c2nn[nH]n2)cc1)C(C(=O)O)C(C)C	0.95	train
COc1ccc2nc(S(=O)Cc3ncc(C)c(OC)c3C)[nH]c2c1	0.95	train
COC12CC(COC(=O)c3cncc(Br)c3)CN(C)C1Cc1cn(C)c3cccc2c13	0.95	train
CC[C@H](C)C(=O)O[C@H]1C[C@@H](C)C=C2C=C[C@H](C)[C@H](CC[C@@H]3C[C@@H](O)CC(=O)O3)[C@H]21	0.95	train
COc1cc(C2Oc3cc(C4Oc5cc(O)cc(O)c5C(=O)C4O)ccc3OC2CO)ccc1O	0.95	train
CCC(C)(C)C(=O)O[C@H]1C[C@@H](C)C=C2C=C[C@H](C)[C@H](CC[C@@H]3C[C@@H](O)CC(=O)O3)[C@H]21	0.95	train
Cn1cnc(S(=O)(=O)N2C[C@H]3[C@@H](C2)[C@]3(CNC(=O)c2ccc(Cl)cc2Cl)CC2CC2)c1	0.95	train
Fc1ccccc1C1=NCC(=S)N(CC(F)(F)F)c2ccc(Cl)cc21	0.95	train
COc1ncnc(Cn2cc(C(=O)NCC(F)F)c3ncc(C)cc32)c1C	0.95	train
CCOC(=O)C1=C(C)N=C(C)C(=C(O)OCC)C1c1ccccc1C=CC(=O)OC(C)(C)C	0.95	train
CC(C)=CCC1C(=O)N(c2ccccc2)N(c2ccccc2)C1=O	0.95	train
O=[N+]([O-])c1ccc2c(c1)CCN2c1ccc(O[C@H]2O[C@H](CO)[C@@H](O)[C@H](O)[C@@H]2O)cc1	0.95	train
CCCc1nc(C)c2c(=O)[nH]c(-c3cc(S(=O)(=O)N4CCN(CC)CC4)ccc3OCC)nn12	0.95	train
C[C@H]1CN([C@@H](C)CO)C(=O)c2cccc(NC(=O)c3ccncc3)c2O[C@H]1CN(C)Cc1ccc(Oc2ccccc2)cc1	0.95	train
COc1ccc(-c2coc3cc(O)ccc3c2=O)cc1	0.95	train
CCCCN1CCCCC1C(=O)Nc1c(C)cccc1C	0.95	train
OCCN1CCN(CCCN2c3ccccc3Sc3ccc(C(F)(F)F)cc32)CC1	0.95	train
C[C@@H](CO)N1C[C@@H](C)[C@@H](CN(C)Cc2ccc(Oc3ccccc3)cc2)Oc2c(NC(=O)c3ccncc3)cccc2C1=O	0.95	train
COCCOC(O)=C1C(C)=NC(C)=C(C(=O)OC(C)C)C1c1cccc([N+](=O)[O-])c1	0.95	train
CNC(=O)c1cccc(-c2ccc3c(N4CCOC[C@@H]4C)nc(N4CCOC[C@@H]4C)nc3n2)c1	0.95	train
COc1cc([C@@H]2Oc3cc([C@H]4Oc5cc(O)cc(O)c5C(=O)[C@@H]4O)ccc3O[C@H]2CO)ccc1O	0.95	train
NC(=O)C1=C(O)C2(O)C(=O)C3=C(O)c4c(O)cccc4CC3CC2CC1=O	0.95	train
C[C@@H]1CN([C@H](C)CO)C(=O)c2cccc(NC(=O)c3ccncc3)c2O[C@@H]1CN(C)Cc1ccc(Oc2ccccc2)cc1	0.95	train
CCOC(=O)Nc1cccc(NC(=O)c2ccccc2Br)c1	0.95	train
Clc1ccc(COC(Cn2ccnc2)c2ccc(Cl)cc2Cl)c(Cl)c1	0.95	train
OCCN1CCN(CCC=C2c3ccccc3Sc3ccc(C(F)(F)F)cc32)CC1	0.95	train
CCC(C)(C)C(=O)O[C@H]1C[C@@H](C)C=C2C=C[C@H](C)[C@H](CC[C@@H](O)C[C@@H](O)CC(=O)O)[C@H]21	0.95	train
O=C(O)[C@H](S)[C@H](S)C(=O)O	0.95	train
CCN(CC)CCCN(c1ccccc1)C1Cc2ccccc2C1	0.95	train
CCC(C)(C)C(=O)Nc1cccc(NC(=O)c2ccccc2Br)c1	0.95	train
CC(C)(C)NCC(O)COc1ccccc1C1CCCC1	0.95	train
CCS(=O)(=O)N1CCC([C@@H](C)n2c(C)c(C(=O)NCc3c(C)cc(C)[nH]c3=O)c3ccccc32)CC1	0.95	train
O=C1Nc2cccc3c4c(cc(c23)O1)N(C(=O)c1cc2cc(NC(=O)c3cc5ccccc5[nH]3)ccc2[nH]1)C[C@H]4CCl	0.95	train
CC(C)(Oc1ccc(C2CC2(Cl)Cl)cc1)C(=O)O	0.95	train
CC(OC1OCCN(Cc2n[nH]c(O)n2)C1c1ccc(F)cc1)c1cc(C(F)(F)F)cc(C(F)(F)F)c1	0.95	train
CC12COC(=O)CC1CCC1C2CCC2(C)C1CCC2(C)O	0.95	train
C#CC1(OC(C)=O)CCC2C3CCC4=CC(=O)CCC4C3CCC21C	0.95	train
C[C@@H](O[C@H]1OCCN(Cc2nc(=O)[nH][nH]2)[C@H]1c1ccc(F)cc1)c1cc(C(F)(F)F)cc(C(F)(F)F)c1	0.95	train
COc1ncc(OC)c2c(C(=O)C(=O)N3CCN(C(=O)c4ccccc4)CC3)c[nH]c12	0.95	train
CCC(C)C(=O)OC1CC(C)C=C2C=CC(C)C(CCC3CC(O)CC(=O)O3)C21C	0.95	train
CC[C@H](C)C(=O)O[C@H]1C[C@@H](C)C=C2C=C[C@H](C)[C@H](CC[C@@H](O)C[C@@H](O)CC(=O)O)[C@H]21	0.95	train
CCc1cc2c(cc1CC)CC(NC[C@H](O)c1ccc(O)c3[nH]c(=O)ccc13)C2	0.95	train
CN1C(=O)N(c2cc(Cl)cc(Cl)c2)C(=O)[C@]12CN(c1ccc(C(=O)O)cn1)C[C@H]2c1ccc(C#N)cc1	0.95	train
COC(=O)c1ccc(-c2ccc(O[C@H]3O[C@H](CO)[C@@H](O)[C@H](O)[C@@H]3O)cc2Cl)cc1	0.95	train
CN(C)CC=CC(=O)Nc1cc2c(Nc3ccc(F)c(Cl)c3)ncnc2cc1O[C@H]1CCOC1	0.95	train
Cc1sc2ncnc(N3CCC(C(=O)N4CC[C@H](F)C4)CC3)c2c1C	0.95	train
COc1ccc(N(Cc2cnccc2C)C2CCN([C@H](C)CCNC(=O)c3c(C)ccnc3C)CC2)cc1	0.95	train
CC(C)(C)NCC(O)COc1cccc2c1SCCC2	0.95	train
Cn1c(CCCC(=O)O)nc2cc(N(CCCl)CCCl)ccc21	0.95	train
O=C(CO)NC1CCN(Cc2ccc(Oc3nc4ccccc4s3)cc2)CC1	0.95	train
O=C(C=Cn1cnc(-c2cc(C(F)(F)F)cc(C(F)(F)F)c2)n1)NNc1cnccn1	0.95	train
CC(=O)Nc1cccc(Nc2cc(NC3CC3)n3ncc(C#N)c3n2)c1	0.95	train
COC(=O)C1=C(C)N=C(C)C(=C(O)OC)C1c1ccccc1[N+](=O)[O-]	0.95	train
Cc1ncc(Cl)c(N2CC[C@@H](C)N(C(=O)c3ccccc3-n3nccn3)CC2)n1	0.95	train
Cc1onc(C(=O)N2[C@H]3CC[C@@H]2C[C@H](Nc2cc(=O)n(C)c4nccnc24)C3)c1C	0.95	train
N#Cc1ccccc1-c1cc(-c2ccccn2)cn(-c2ccccc2)c1=O	0.95	train
Cc1onc(C(=O)N2CCC(Nc3cc(=O)n(C)c4cc(F)c(F)cc34)CC2)c1C	0.95	train
CN1C[C@@H]2c3ccccc3Oc3ccc(Cl)cc3[C@H]2C1	0.95	train
COc1cc(C(C)=O)ccc1OCCCN1CCC(c2noc3cc(F)ccc23)CC1	0.95	train
Cn1c(-c2cc(=O)c(O)c[nH]2)nn(S(=O)(=O)NC(=O)N2C[C@H](NC(=O)/C(=N\OC(C)(C)C(=O)O)c3csc(N)n3)C2=O)c1=O	0.95	train
Cc1ccc(S(=O)(=O)NC(=O)NC2C3CCC(C)(C2O)C3(C)C)cc1	0.95	train
CS(=O)(=O)CCCOc1cccc2c1ccn2-c1ccnc(N[C@H]2CC[C@H](C(=O)N3CCC(O)CC3)CC2)n1	0.95	train
C=C1C[C@H]2[C@@H]3CCC4=CC(=O)CC[C@@H]4[C@H]3CC[C@]2(C)[C@@]1(OC(C)=O)C(C)=O	0.95	train
C[C@]1(CS(=O)(=O)N2CCC(Oc3ccc(OC(F)(F)C(F)F)cc3)CC2)NC(=O)NC1=O	0.95	train
COC(=O)[C@H]1[C@H]2C[C@@H]3c4[nH]c5cc(OC)ccc5c4CCN3C[C@H]2C[C@@H](OC(=O)c2cc(OC)c(OC)c(OC)c2)[C@@H]1OC	0.95	train
CC(C)[C@@H]1NC(=O)C/C=C/c2ccc3ccc(cc3c2)[C@@H](C)OC(=O)[C@@H]2CCCN(N2)C(=O)[C@H](C)NC1=O	0.95	train
N#Cc1cnc2c(ccn2-c2ccc(O[C@H]3O[C@H](CO)[C@@H](O)[C@H](O)[C@@H]3O)c(Cl)c2)c1	0.95	train
CCN(CC)CCNC(=O)c1c(C)[nH]c(C=C2C(=O)Nc3ccc(F)cc32)c1C	0.95	train
O=C(CCCN1CC=C(n2c(O)nc3ccccc32)CC1)c1ccc(F)cc1	0.95	train
Cc1ccc(S(=O)(=O)NC(=O)NN2CCCCCC2)cc1	0.95	train
N#Cc1ncc(N2C(=O)C3(CCC3)N(c3ccc(C(N)=O)c(F)c3)C2=S)cc1C(F)(F)F	0.95	train
O=C(Nc1ccc(Cl)c(Cl)c1)N1CCN(C[C@@H]2CCCN(C3CC3)C2)CC1	0.95	train
Cc1ccccc1N1C(=O)c2cc(S(N)(=O)=O)c(Cl)cc2NC1C	0.95	train
Cc1ccccc1N1C(=O)c2cc(S(N)(=O)=O)c(Cl)cc2N[C@@H]1C	0.95	train
CC1(C)C(=O)N(c2ccc(C#N)c(C(F)(F)F)c2)C(=S)N1c1ccc(C(N)=O)c(F)c1	0.95	train
O=C(c1ccc(F)cc1)C1CCN(CCn2c(=O)[nH]c3ccccc3c2=O)CC1	0.95	train
CCN(CC)CCNC(=O)c1c(C)[nH]c(/C=C2\C(=O)Nc3ccc(F)cc32)c1C	0.95	train
CC(=O)OCC(=O)C1(O)CCC2C3CCC4=CC(=O)CCC4(C)C3C(=O)CC21C	0.95	train
Nc1ccc(S(=O)(=O)Nc2ccnn2-c2ccccc2)cc1	0.95	train
O=C1CN=C(c2ccccc2Cl)c2cc(Cl)ccc2N1	0.949667	train
C[C@@H](NC(=O)[C@H]1CCCCN1)c1ccc(Nc2ncc3cc(-c4ccncc4)ccc3n2)cc1	0.949	train
Cc1ccc(-c2c[nH]cn2)cc1NC(=O)c1ccc(OCc2ccccn2)cc1	0.949	train
CCNC(=O)c1noc(-c2cc(C(C)C)c(O)cc2O)c1-c1ccc(CN2CCOCC2)cc1	0.949	train
Cc1ccoc1C(=O)Nc1ccc(N2C(=O)c3cccc(F)c3C2=O)c(Cl)c1	0.949	train
Cc1nc(Nc2nc3cnc(N4CCN(C)CC4)cc3[nH]2)cc(C2CC2)c1F	0.949	train
Cc1ccc(C(CCC(N)C(=O)O)(c2ccccc2)c2ccccc2)cc1C	0.949	train
CC(C)N1CCN(c2ccc(OC[C@H]3CO[C@](Cn4cncn4)(c4ccc(Cl)cc4Cl)O3)cc2)CC1	0.949	train
O=C1c2cc(Cl)ccc2-n2c1nc1ncccc1c2=O	0.949	train
Cc1noc2c(F)c3c(cc12)CC1(C(=O)NC(=O)NC1=O)[C@H]1[C@H](C)O[C@@H](C)CN31	0.949	train
Cc1ccc(CO)cc1N(C)c1ccnc(Nc2cc(N3CCOCC3)nc(N3CCOCC3)c2)n1	0.948	train
C[C@@H](Oc1cc(-n2cnc3ccc(OC4CCN(C)CC4)cc32)sc1C(N)=O)c1ccccc1C(F)(F)F	0.948	train
Cc1nc(Oc2ccc(C(=O)O)cc2)ccc1CN1CCC(N2C(=O)N(C3CCOCC3)C[C@H]2c2cccc(F)c2)CC1	0.948	train
Cc1ccc(-c2ccc(N)nn2)cc1NC(=O)c1ccc(OCc2ccccn2)cc1	0.948	train
CC1CN2c3c(cc4c(C5CC5)noc4c3F)CC3(C(=O)NC(=O)NC3=O)C2C(C)O1	0.948	train
CS(=O)(=O)c1ccc(-c2cnc(N)c(-c3ccc(C(F)(F)F)c(F)c3)c2)cc1	0.948	train
CN(C)C(=O)CN1CC(c2nc(C(=O)NCc3ccc(F)cc3)c(O)c3ncccc23)CC1=O	0.948	train
CC(C)NC(=O)[C@H]1CC[C@@H](n2/c(=N/C(=O)c3ccc(F)cc3)[nH]c3ccc(CN4CCC(C(C)(C)O)CC4)cc32)CC1	0.947	train
Cc1nnc2sc(C(=O)NCc3ccc(S(=O)(=O)C(F)F)cc3)c(N)c2c1C	0.947	train
Cc1cc(Nc2nc(N[C@@H](C)c3ccc(F)cn3)c(C#N)cc2F)n[nH]1	0.947	train
CN[C@H](C)C(=O)NCc1cccc(Cn2nc(NS(=O)(=O)c3ccc(Cl)s3)c3c(OC)cccc32)c1	0.946	train
Cc1onc(-c2c(F)cccc2Cl)c1C(=O)N[C@@H]1C(=O)N2[C@@H](C(=O)O)C(C)(C)S[C@H]12	0.946	train
CC(C)n1cnc2c(NCc3ccc(-c4ccccn4)cc3)nc(NC[C@@H](O)CO)nc21	0.946	train
CN(C)Cc1nccn1-c1ccc(N2CCC(NS(=O)(=O)c3ccc4c(Cl)c[nH]c4c3)C2=O)c(F)c1	0.946	train
COC(=O)C1=C(CN2CCOC[C@H]2C(=O)O)NC(c2nccs2)=N[C@H]1c1ccc(F)c(F)c1C	0.946	train
N[C@@H]1c2cccnc2[C@H](OC(=O)N2CCC(n3c(=O)[nH]c4ncccc43)CC2)CC[C@H]1c1cccc(F)c1F	0.9455	train
CNCC[C@@H](Oc1ccc(C(F)(F)F)cc1)c1ccccc1	0.945	train
CNC(=O)c1ccc(Oc2ccc(CN3CCC(N4C(=O)N(C5CCOCC5)C[C@H]4c4ccccc4)CC3)c(C)n2)cc1	0.945	train
Fc1ccc([C@@H]2CCNC[C@H]2COc2ccc3c(c2)OCO3)cc1	0.945	train
O=C(O)c1ccc(Oc2ccc(CN3CCC(N4C(=O)N(C5CCOCC5)C[C@H]4c4cccc(Cl)c4)CC3)cn2)cc1	0.945	train
O=C(O)c1cn(Cc2ccc(-c3cccnc3)cc2)c2cccc(F)c2c1=O	0.945	train
Cc1ccc(-c2cn(C)c(C)n2)cc1NC(=O)c1ccc(OCc2ccccn2)cc1	0.944	train
Cc1ccc(-c2ncc[nH]2)cc1NC(=O)c1ccc(OCc2ccccn2)cc1	0.944	train
Cc1cc(C(=O)N[C@H]2CC[C@@H](NC(=O)c3cc(F)cnc3Oc3cccc(-c4ccc(O)cc4CN4CCOCC4)c3)CC2)nn1C	0.944	train
Nc1ncnc2c1C(=O)N(c1ccc(-c3ccccc3Cl)c(F)c1)CCO2	0.944	train
CC(=O)Nc1ccc2ccn(-c3cc(NCCN4CCCC4)n4ncc(C#N)c4n3)c2c1	0.944	train
Cc1ccc(-c2cc(-c3ccc(S(C)(=O)=O)cc3)cnc2N)c2cccnc12	0.944	train
Cc1nc(Sc2ccc(C(=O)O)cc2)ccc1CN1CCC(N2C(=O)N(C3CCOCC3)C[C@H]2c2ccccc2)CC1	0.943	train
O=C1CCc2ccccc2N1CCCN1CCC(Cc2ccccc2)CC1	0.943	train
O=C(C=Cc1cccc(S(=O)(=O)Nc2ccccc2)c1)NO	0.943	train
COC(=O)C1=C(CN2CCOC[C@H]2C(=O)O)NC(c2nccs2)=N[C@H]1c1ccc(F)cc1Cl	0.943	train
c1ccc(OC[C@@H]2CN(Cc3cn4ccccc4n3)CCO2)cc1	0.943	train
COCC1CN(c2ccc(OCc3cccc(C#N)c3)cc2)C(=O)O1	0.9425	train
C[C@H](c1ccc(F)cc1)N1C(=O)O[C@](Cc2ccccc2)(c2nc3c(NS(C)(=O)=O)cccc3[nH]2)C1=O	0.942	train
CC(C)Oc1cc(Nc2nc3c(cc2F)ncn3[C@@H](CO)c2ccc(F)cn2)n[nH]1	0.942	train
O=C(O)c1cn(Cc2ccc(-c3cccc(CO)n3)cc2)c2c(F)cccc2c1=O	0.942	train
Cc1nn(C)c2cc(Nc3n[nH]c4cccnc34)ccc12	0.942	train
Cc1cc(N2CCOCC2)cc2[nH]c(-c3c(NCCc4ncn(C)c4Cl)cc[nH]c3=O)nc12	0.941	train
O=C(O)c1cn(Cc2ccc(-c3cn[nH]c3)cc2F)c2ccccc2c1=O	0.941	train
COc1cc2c(cc1O)CCNC21CSC2c3c(OC(C)=O)c(C)c4c(c3C(COC1=O)N1C(O)C3Cc5cc(C)c(OC)c(O)c5C(C21)N3C)OCO4	0.941	train
N#Cc1cccc(-c2ccc(N3CCOc4ncnc(N)c4C3=O)cc2)c1Cl	0.941	train
CS(=O)(=O)N1CCc2cc(S(=O)(=O)c3ccc4c(c3)OCCO4)ccc21	0.941	train
CCCCC(F)(F)[C@@]1(O)CC[C@H]2[C@@H](CC(=O)[C@@H]2CCCCCCC(=O)O)O1	0.94	train
CNC(=O)N[C@H]1CC[C@H](CCN2CCN(c3cccc(Cl)c3Cl)CC2)CC1	0.94	train
CN[C@@H](CC(C)C)C1(c2ccc(Cl)cc2)CCC1	0.94	train
C=C(C)[C@@H]1CCC(C)=C[C@H]1c1c(O)cc(CCCCC)cc1O	0.94	train
CC(=O)N[C@H](C)c1ccc(Nc2ncc3cc(-c4ccncc4)ccc3n2)cc1	0.94	train
CC(C)C[C@@H](N)C1(c2ccc(Cl)cc2)CCC1	0.94	train
CN(C)c1nc(N(C)C)nc(N(C)C)n1	0.94	train
CSc1ccc(/C=C2\C(C)=C(CC(=O)O)c3cc(F)ccc32)cc1	0.94	train
N#Cc1ccnc(N2C(=O)CC[C@H]2C(=O)N(c2cncc(F)c2)[C@H](C(=O)NC2CC(F)(F)C2)c2ccccc2Cl)c1	0.94	train
Cc1ccncc1CN(c1ccccc1)C1CCN([C@H](C)CCNC(=O)c2c(C)cc(C#N)nc2C)CC1	0.94	train
COc1ncnc(Cn2cc(C(=O)NCCF)c3ncc(C)cc32)c1C	0.94	train
CN(C)CCC=C1c2ccccc2CCc2ccccc21	0.94	train
CCCCN1CCCC[C@H]1C(=O)Nc1c(C)cccc1C	0.94	train
CC(C)Oc1cc(-n2cnc3ccc(N[C@@H](C)c4ccc(F)cn4)nc32)n[nH]1	0.94	train
CCCCN1CCCC[C@@H]1C(=O)Nc1c(C)cccc1C	0.94	train
Cc1ccc(C(C)(C)O)cc1-c1ccc2c(n1)n(C)c(=O)n2CC(C)(C)C	0.94	train
COc1cc(Nc2c(C#N)cnc3cc(OCCCN4CCN(C)CC4)c(OC)cc23)c(Cl)cc1Cl	0.94	train
Cc1ccc(N2CC(COc3ccc(-c4noc(C)n4)cc3)C2)nn1	0.94	train
C=CC(=O)N1CCC([C@@H]2CCNc3c(C(N)=O)c(-c4ccc(Oc5ccccc5)cc4)nn32)CC1	0.94	train
CN(C)C(=O)NC1CCC(CCN2CCN(c3cccc(Cl)c3Cl)CC2)CC1	0.94	train
CCCN1CCCC[C@H]1C(=O)Nc1c(C)cccc1C	0.94	train
COC(=O)c1ccc(-c2c(Cl)cc(O[C@H]3O[C@H](CO)[C@@H](O)[C@H](O)[C@@H]3O)cc2Cl)cc1	0.94	train
Cc1onc(-c2ccccc2Cl)c1C(=O)NC1C(=O)N2C1SC(C)(C)C2C(=O)O	0.94	train
Cn1cnc2ccc(-c3cc(F)c(Cn4cnc5cnccc5c4=O)c(F)c3)cc21	0.94	train
CCCN1CCCCC1C(=O)Nc1c(C)cccc1C	0.94	train
CC(C)(C)c1cc(C(=O)Nc2nc(CN)cs2)n(Cc2ccccc2)n1	0.94	train
O=C(NCc1ccc(S(=O)(=O)c2cc(F)cc(F)c2)cc1)c1ccc2nccn2c1	0.94	train
CCc1nc(C(N)=O)c(Nc2ccc(N3CCC(N4CCN(C)CC4)CC3)c(OC)c2)nc1NC1CCOCC1	0.94	train
O=C1C(NS(=O)(=O)/C=C/c2ccc(Cl)s2)CCN1c1ccc(-n2ccnc2CN2CCC(F)C2)cc1F	0.94	train
CN(C)c1ccc2nc3ccc(N(C)C)cc3[s+]c2c1	0.94	train
Cc1ccc(CN2CC[C@@H](N3CC[C@@H](c4ccc(O)cc4)[C@H](F)C3)C2=O)cc1	0.94	train
CC12CCC(=O)C=C1C=CC1C2CCC2(C)C1CCC2(O)CCC(=O)O	0.94	train
CCC(C)(C)C(=O)OC1CC(C)C=C2C=CC(C)C(CCC3CC(O)CC(=O)O3)C21	0.94	train
CN1CC(=O)N2[C@H](Cc3c([nH]c4ccccc34)[C@H]2c2ccc3c(c2)OCO3)C1=O	0.94	train
CCOC(=O)[C@H](C)C[C@@H](Cc1ccc(-c2ccccc2)cc1)NC(=O)CCC(=O)O	0.94	train
CN1CC(=O)N2C(Cc3c([nH]c4ccccc34)C2c2ccc3c(c2)OCO3)C1=O	0.94	train
C[C@]1(CS(=O)(=O)N2CCN(c3ncc(OCc4ccc(C(F)(F)F)o4)cn3)CC2)NC(=O)NC1=O	0.94	train
CN1CCN(CCCCN2C(=O)CN(/N=C/c3ccc(-c4ccc(Cl)cc4)o3)C2=O)CC1	0.94	train
NC(=O)N[C@H]1CC[C@H](CCN2CCN(c3cccc(Cl)c3Cl)CC2)CC1	0.94	train
CN1CCC(c2c(O)cc(O)c3c(=O)cc(-c4ccccc4Cl)oc23)C(O)C1	0.94	train
C[C@H](C[C@@H](Cc1ccc(-c2ccccc2)cc1)NC(=O)CCC(=O)O)C(=O)O	0.94	train
CCCC(=O)N1CCCN(c2nc(N)c3cc(OC)c(OC)cc3n2)CC1	0.94	train
CS(=O)(=O)Nc1ccc2c(ccn2-c2ccc(O[C@H]3O[C@H](CO)[C@@H](O)[C@H](O)[C@@H]3O)c(Cl)c2)c1	0.94	train
C[C@H]1[C@H](NC(=O)/C(=N\OC(C)(C)C(=O)O)c2nc(N)sc2Cl)C(=O)N1C(=O)NS(=O)(=O)n1nc(-c2cc(=O)c(O)c[nH]2)n(CCCS(C)(=O)=O)c1=O	0.94	train
CN1CCc2cccc3c2C1Cc1ccc(O)c(O)c1-3	0.94	train
NS(=O)(=O)c1cc2c(cc1C(F)(F)F)NC(Cc1ccccc1)NS2(=O)=O	0.94	train
CC(=O)N1CCN(c2ccc(CN(C3CCC3)S(=O)(=O)Cc3ccccc3)cc2)CC1	0.94	train
CC(C)(N)[C@H](N[C@H]1CCc2cc(C#Cc3ccc(Cn4ccnc4CO)cc3)ccc21)C(=O)NO	0.94	train
NS(=O)(=O)c1cc(C(=O)O)cc(N2CCCC2)c1Oc1ccccc1	0.94	train
C[C@H]1[C@H](NC(=O)/C(=N\OC(C)(C)C(=O)O)c2csc(N)n2)C(=O)N1C(=O)NS(=O)(=O)n1nc(-c2cc(=O)c(O)c[nH]2)n(CCS(C)(=O)=O)c1=O	0.94	train
Cc1cccc(C(C)c2c[nH]cn2)c1C	0.94	train
Cc1sc2ncnc(N3CCC(C(=O)N4CCCC4)CC3)c2c1C	0.94	train
C#CCN(C)C(C)Cc1ccccc1	0.94	train
C[C@@H](Nc1cc(F)cc(Cl)c1)c1cc(C(=O)N(C)C)cc2c(=O)cc(N3CCOCC3)oc12	0.94	train
COc1ccc2ncc(F)c(CCN3CCC(NCc4ccc5c(n4)NC(=O)CO5)CC3)c2n1	0.94	train
Cc1cccc([C@H](C)c2cnc[nH]2)c1C	0.94	train
CC(C)(O/N=C(\C(=O)N[C@H]1CN(C(=O)NS(=O)(=O)n2nc(-c3cc(=O)c(O)c[nH]3)n(C[C@@H](O)CO)c2=O)C1=O)c1csc(N)n1)C(=O)O	0.94	train
CC(NC(CCc1ccccc1)C(=O)O)C(=O)N1C(C(=O)O)CC2CCCCC21	0.94	train
N#CC(CCN1CCC(C(N)=O)(N2CCCCC2)CC1)(c1ccccc1)c1ccccc1	0.9395	train
NCCNc1nonc1/C(=N/O)Nc1ccc(F)c(Br)c1	0.939	train
c1ccc(CC[C@@H]2CN(Cc3nc4ccccc4[nH]3)CCO2)cc1	0.939	train
C[C@]1(COc2ccc(OC(F)(F)F)cc2)Cn2cc([N+](=O)[O-])nc2O1	0.939	train
O=C(O)c1cn(Cc2ccc(-n3cccn3)cc2)c2ncccc2c1=O	0.939	train
N#Cc1ccc(OCCCN2CCC(C(O)(c3ccccn3)c3nccs3)CC2)cc1	0.938	train
Cc1noc(C)c1S(=O)(=O)Nc1c(N2CCC(N(C)Cc3ccc(OC(F)F)cc3)CC2)c(=O)c1=O	0.938	train
CCn1nc(-c2cccc3cccnc23)cc1-c1ccc(N)nn1	0.938	train
Cc1ccc(-c2[nH]cnc2C)cc1NC(=O)c1ccc(OCc2ccccn2)cc1	0.937	train
Cc1noc2c(F)c3c(cc12)CC1(C(=O)NC(=O)NC1=O)C1C(C)OC(C)CN31	0.937	train
CCCc1nn(C)c2c(=O)[nH]c(-c3cc(S(=O)(=O)N4CCN(C)CC4)ccc3OCC)nc12	0.936	train
Cn1nc(C(C)(C)C)cc1NC(=O)C(C)(C)S(=O)(=O)c1ccc(Cl)cc1	0.936	train
N#Cc1cnc2ccc(F)cc2c1N1CCC(C(=O)Nc2ccc(S(N)(=O)=O)cc2)CC1	0.936	train
CC1=C(CC(=O)O)c2cc(F)ccc2/C1=C\c1ccc(S(C)=O)cc1	0.9355	train
CCN1CC(n2nccc2-c2cc(Cl)ccc2Oc2ccc(S(=O)(=O)Nc3cscn3)cc2C#N)C1	0.9352	train
c1ccc([C@H]([C@@H](c2ccccc2)N2CCCCC2)N2CCCCC2)cc1	0.935	train
O=C(N[C@@H]1CCC[C@@H](NC(=O)c2ccccn2)C1)c1cccc(Cl)c1	0.935	train
COc1cc(Cc2cnc(N)nc2N)c2c(c1OC)OC(C1CC1)C=C2	0.935	train
CC(C)(NC(=O)C1=C(O)[C@@H]2Oc3c(O)ccc4c3[C@]23CCN(CC2CC2)[C@H](C4)[C@]3(O)C1)c1nc(-c2ccccc2)no1	0.935	train
CC(C)(CO)NC(=O)c1c[nH]c2ncc(-c3nn(CCCS(C)(=O)=O)c4cc(F)ccc34)nc12	0.935	train
CS(=O)(=O)c1cccc(-c2ccc(Cn3cc(C(=O)O)c(=O)c4cccc(F)c43)cn2)c1	0.935	train
Clc1ccc(CCCOCCCN2CCCCC2)cc1	0.935	train
Nc1cccc(-c2ccc(Cn3cc(C(=O)O)c(=O)c4cccc(F)c43)cn2)c1	0.935	train
O=C(O)c1cc(CN2CCN(c3ccc(Br)cc3)CC2)c2ccccn2c1=O	0.935	train
O=C1c2c(O)c(=O)ccn2N([C@@H]2c3ccccc3SCc3c2ccc(F)c3F)[C@@H]2COCCN12	0.934	train
N=C(NCCCOc1ccc(F)cc1)Nc1ccc(Cl)cc1	0.934	train
Cn1cc(-c2ccc(Cn3cc(C(=O)O)c(=O)c4sccc43)cc2)cn1	0.934	train
CN(C)Cc1nccn1-c1ccc(N2CCC(NS(=O)(=O)CCc3ccc(Cl)s3)C2=O)c(F)c1	0.934	train
Cc1noc(C)c1S(=O)(=O)Nc1c(N2CCC(NCc3ccc(C(F)(F)F)cc3)CC2)c(=O)c1=O	0.934	train
C[C@H](NC(=O)c1c[nH]c2ncc(C3CC3)nc12)C(C)(C)C#N	0.934	train
O=[N+]([O-])c1ccc(C2=NOC(c3ccc(N4CCOCC4)c(F)c3)C2)o1	0.934	train
O=C(Nc1ccnc(NC(=O)[C@H]2C[C@H]2F)c1)c1c(F)cccc1Cl	0.934	train
CNC(=O)CN1CCC(Oc2cc3c(Nc4cccc(Cl)c4F)ncnc3cc2OC)CC1	0.933	train
Cc1nc(Oc2ccc(C(=O)O)cc2)ccc1CN1CCC(N2C(=O)N(C3CCOCC3)C[C@H]2c2ccccc2)CC1	0.933	train
O=C(Nc1ccc(F)cn1)c1cc(Oc2cncc(F)c2F)cn2ncnc12	0.933	train
CCC1(CC)C[C@@H](C(=O)NCc2ccc(C(=N)N)cc2)n2c1c(Cl)nc(NC1CCC1)c2=O	0.932	train
O=S(=O)(NCCO)c1ccc(-c2ccnc3[nH]c(C4CC4)cc23)cc1	0.932	train
COC1/C=C/OC2(C)Oc3c(C)c(O)c4c(O)c(c(/C=N/N5CCN(C6CCCC6)CC5)c(O)c4c3C2=O)NC(=O)/C(C)=C\C=C\C(C)C(O)C(C)C(O)C(C)C(OC(C)=O)C1C	0.932	train
CC1(C)CC(=O)c2c(C(F)(F)F)nn(-c3ccc(C(N)=O)c(N[C@H]4CC[C@H](O)CC4)c3)c2C1	0.932	train
CN(C)Cc1nccn1-c1ccc(N2CCC(NS(=O)(=O)c3ccc4[nH]cc(Cl)c4c3)C2=O)c(F)c1	0.932	train
N#Cc1cc(Cl)c(C(=O)Nc2ccnc(NC(=O)[C@H]3C[C@H]3F)c2)c(Cl)c1	0.932	train
CC(C)Oc1cc(Nc2nc(N[C@@H](C)c3ccc(F)cn3)ncc2Cl)n[nH]1	0.931	train
CN1CCC(COCc2cc(C(F)(F)F)cc(N3CCC4CC43)n2)(c2ccc(F)cc2)CC1	0.931	train
Cc1ccccc1-c1ccc(N2CCOc3ncnc(N)c3C2=O)cc1	0.931	train
CC(=O)c1sc(NC(=O)N[C@@H]2CN(C(C)=O)CC[C@H]2CN2CCC[C@@H](Cc3ccc(F)cc3)C2)nc1C	0.931	train
CCCCCn1cc(C(=O)NC23CC4CC(CC(C4)C2)C3)c(=O)c(-c2ccncc2)c1C	0.93	train
CC(C)C[C@H]1C(=O)N2CCC[C@H]2[C@]2(O)O[C@](NC(=O)[C@@H]3C=C4c5cccc6[nH]c(Br)c(c56)C[C@H]4N(C)C3)(C(C)C)C(=O)N12	0.93	train
Fc1ccc(-c2cc(C3(c4ccccc4)CCN(CCc4ccccc4)CC3)[nH]n2)cc1	0.93	train
CC(C)CC1C(=O)N2CCCC2C2(O)OC(NC(=O)C3C=C4c5cccc6[nH]c(Br)c(c56)CC4N(C)C3)(C(C)C)C(=O)N12	0.93	train
C#Cc1cccc(Nc2ncnc3cc(OCCOC)c(OCCOC)cc23)c1	0.93	train
CC(C)Cc1sc(N)nc1-c1ccc(P(=O)(O)O)o1	0.93	train
CN(C)CCC=C1c2ccccc2C=Cc2ccccc21	0.93	train
Cc1ccc2nc(C[N+]34CCC(CC3)[C@@H](OC(=O)[C@](C)(c3ccccc3)N3CCCCC3)C4)oc2c1	0.93	train
COc1ccc(-n2c(CCN3C(=O)c4cccc(-c5ccncc5)c4C3=O)nc3ccccc3c2=O)cc1	0.93	train
Cc1cc2c(s1)=Nc1ccccc1NC=2N1CCN(C)CC1	0.93	train
CC(C)C[C@@H]1C(=O)N[C@H](C2Cc3ccccc3C2)C(=O)N1[C@@H](C(=O)NC(C)C)c1ccc(F)cc1F	0.93	train
CC=C1NC(=O)[C@H]2CSSCCC=C[C@H](CC(=O)N[C@H](C(C)C)C(=O)N2)OC(=O)[C@H](C(C)C)NC1=O	0.93	train
COc1cc2cc(c1Cl)N(C)C(=O)CC(OC(=O)C(C)N(C)C(=O)CCS)C1(C)OC1C(C)C1CC(O)(NC(=O)O1)C(OC)C=CC=C(C)C2	0.93	train
Cc1cc2c(s1)Nc1ccccc1N=C2N1CCN(C)CC1	0.93	train
CC(C)CC(=O)Nc1cccc(NC(=O)c2ccccc2Br)c1	0.93	train
O=C(NCC1CN(c2ccc(N3CCOCC3=O)cc2)C(=O)O1)c1ccc(Cl)s1	0.93	train
COc1ccc(Cc2nccc3cc(OC)c(OC)cc23)cc1OC	0.93	train
CCC(C)C1OC2(CCC1C)CC1CC(CC=C(C)C(OC3CC(OC)C(OC4CC(OC)C(O)C(C)O4)C(C)O3)C(C)C=CC=C3COC4C(O)C(C)=CC(C(=O)O1)C34O)O2	0.93	train
CCC(=O)N(c1ccccc1)C1(COC)CCN(CCc2cccs2)CC1	0.93	train
CC(=O)Nc1cc(Nc2cc(NC3CC3)n3ncc(C#N)c3n2)ccc1NCCCO	0.93	train
CN1C[C@H](C(=O)N[C@]2(C)O[C@@]3(O)[C@@H]4CCCN4C(=O)[C@H](Cc4ccccc4)N3C2=O)C[C@@H]2c3cccc4[nH]cc(c34)C[C@H]21	0.93	train
CCCCC[C@H](O)C=C[C@H]1[C@H](O)CC(=O)[C@@H]1CCCCCCC(=O)O	0.93	train
CCn1nc2c(-c3ccc(Cl)cc3)c(-c3cnc(C)nc3)c(=O)n(Cc3ccc(C(F)(F)F)nc3C)n2c1=O	0.93	train
Cc1nnc2n1-c1sc(Br)cc1C(c1cccc(Cl)c1)=NC2	0.93	train
Cc1cc(C(=O)NCCc2ccc(S(=O)(=O)NC(=O)NN3CCCCCC3)cc2)no1	0.93	train
Cc1nc(O)c2cc(CN(C)c3ccc(C(=O)NC(CCC(=O)O)C(=O)O)s3)ccc2n1	0.93	train
CC[C@H](C)[C@@H]([C@@H](CC(=O)N1CCC[C@H]1[C@H](OC)[C@@H](C)C(=O)N[C@@H](Cc1ccccc1)c1nccs1)OC)N(C)C(=O)[C@@H](NC(=O)C(C)(C)N)C(C)C	0.93	train
Nc1c(C(=O)NCC(O)(CN(CCF)C(=O)c2c(F)cccc2F)C(F)(F)F)cnn1-c1ccc(F)cc1	0.93	train
CCS(=O)(=O)Nc1cccc(NC(=O)c2ccccc2Br)c1	0.93	train
CCOC(=O)C1=C(COCCN)NC(C)=C(C(=O)OC)[C@@H]1c1ccccc1Cl	0.93	train
CCc1cc2c(s1)-n1c(C)nnc1CN=C2c1ccccc1Cl	0.93	train
CCOC(O)=C1C(COCCN)=NC(C)=C(C(=O)OC)C1c1ccccc1Cl	0.93	train
Nc1c(C(=O)NCC(O)(CN(CCO)C(=O)c2c(Cl)cccc2Cl)C(F)(F)F)cnn1-c1ccc(F)cc1	0.93	train
Cn1cc(C(=O)NC[C@@H](O)CN2CCC(Oc3ccc(Cl)c(Cl)c3)CC2)c(C(F)(F)F)cc1=O	0.93	train
O=C(O)c1ccc2c(ccn2-c2ccc(O[C@H]3O[C@H](CO)[C@@H](O)[C@H](O)[C@@H]3O)c(Cl)c2)c1	0.93	train
C[C@H]1[C@H](NC(=O)/C(=N\OC(C)(C)C(=O)O)c2csc(N)n2)C(=O)N1C(=O)NS(=O)(=O)n1nc(-c2cc(=O)c(O)c[nH]2)n(CCCCS(C)(=O)=O)c1=O	0.93	train
COC(=O)c1ccc(-c2ccc(O[C@H]3O[C@H](CO)[C@@H](O)[C@H](O)[C@@H]3O)cc2)cc1	0.93	train
COc1ccc(N(Cc2cccnc2)C2CCN([C@H](C)CCNC(=O)c3c(C)cc(Cl)nc3C)CC2)cc1	0.93	train
Cc1onc(-c2ccccc2)c1C(=O)NC1C(=O)N2C1SC(C)(C)C2C(=O)O	0.93	train
C[C@@H](c1cc2ccccc2s1)N(O)C(N)=O	0.93	train
O=C(O)COCCN1CCN(C(c2ccccc2)c2ccc(Cl)cc2)CC1	0.93	train
CC(c1cc2ccccc2s1)N(O)C(N)=O	0.93	train
NC(=O)C(=O)C(Cc1ccccc1)NC(=O)c1cccnc1-n1ccc(-c2ccccc2)n1	0.93	train
Clc1ccc2c(c1)C(c1ccccc1)=NCc1nncn1-2	0.93	train
CN1CCN2c3ccccc3Cc3ccccc3C2C1	0.93	train
O=C(O)[C@@H]1C[C@H](Oc2cccc(Cl)c2)CN1	0.93	train
CC(=O)O[C@H]1C(=O)[C@]2(C)[C@@H](O)C[C@H]3OC[C@@]3(OC(C)=O)[C@H]2[C@H](OC(=O)c2ccccc2)[C@]2(O)C[C@H](OC(=O)[C@H](O)[C@@H](NC(=O)c3ccccc3)c3ccccc3)C(C)=C1C2(C)C	0.93	train
CCN1CCCC1CNC(=O)c1c(OC)ccc(Br)c1OC	0.93	train
CC(C)(O)C(=O)Nc1ccc([N+](=O)[O-])c(C(F)(F)F)c1	0.93	train
CC(C)c1nnc(N2CCN(c3ncc(OCc4ccncc4C#N)cn3)[C@H](C)C2)o1	0.929	train
Cc1ccc([C@@H](C)Oc2cc3onc(CCC(=O)O)c3cc2Cl)nn1	0.929	train
O=C(O)c1cn(Cc2ccc(-c3cncc(F)c3)cn2)c2c(F)cccc2c1=O	0.929	train
O=C(Nc1ccc(F)cn1)c1cc(Oc2cncc(F)c2)cn2ncnc12	0.929	train
CC12CCC(O)CC1CCC1C2CCC2(C)C(C3=CC(=O)OC3)CCC12O	0.9285	train
COc1ccc(-c2cc(CC[C@](C)(C(=O)NO)S(C)(=O)=O)on2)c(F)c1	0.928	train
Cc1ccc(-c2nc3ccc(C)cn3c2CC(=O)N(C)C)cc1	0.9275	train
CN(C)CCOc1cncc(-c2cccc(-c3cn4cccc(C(N)=O)c4n3)c2)c1	0.927	train
OCCN1CCN(CCCN2c3ccccc3Sc3ccc(Cl)cc32)CC1	0.926667	train
O=C(O)CCn1c(=O)oc2cc(OCc3ccccn3)c(Cl)cc21	0.926	train
Cc1cc(Oc2cnc(C)nc2)cc(C(=O)Nc2ccc(F)cn2)n1	0.926	train
C=CC(=O)Nc1cc(Nc2ncc(C)c(-c3cn(C)c4ccccc34)n2)c(OC)cc1N(C)CCN(C)C	0.925	train
C=CC(=O)Nc1cc(Nc2nccc(-c3c[nH]c4ccccc34)n2)c(OC)cc1N(C)CCN(C)C	0.925	train
Cc1nn(C2CCOCC2)c(NS(=O)(=O)c2ccc(C3CC3)cc2)c1C(=O)N[C@@H](C)C(C)(C)C	0.925	train
Cc1cc(C)nc(N2C[C@H]3CN(C(=O)c4ccc(F)cc4-n4nccn4)C[C@H]3C2)n1	0.925	train
CC1Cc2cc(S(=O)(=O)c3ccc4c(c3)OCCO4)ccc2N1S(C)(=O)=O	0.925	train
Cn1cnc(S(=O)(=O)N2C[C@H]3[C@@H](C2)[C@]3(CNC(=O)c2ccccc2C(F)(F)F)c2ccccn2)c1	0.924	train
CN(C(=O)Cc1ccc(-n2cnnn2)cc1)C1CCN(Cc2ccc(C(F)(F)F)cc2)CC1	0.924	train
CC[C@H](C)C(=O)N1CCC(NC(=O)Nc2ccc(OC(F)(F)F)cc2)CC1	0.924	train
O=c1n(CCCN2CCN(c3cccc(Cl)c3)CC2)nc2ccccn12	0.923333	train
NC(=O)Nc1sc(-c2ccccc2)cc1C(=O)N[C@H]1CCCNC1	0.923	train
COc1cccc2c1c(NS(=O)(=O)c1ccc(Cl)s1)nn2Cc1cccc(CNC(=O)[C@@H]2CCCCN2)c1	0.922	train
O=C(O)[C@H]1CC[C@H](OC2CCN(c3ccc(-c4nc5cc(C(F)(F)F)ccc5[nH]4)cn3)CC2)CC1	0.922	train
Cc1nc(C)c(-c2ccc([C@H]3CC[C@H](CC(=O)NC(C)(C)C(=O)O)CC3)cc2)nc1C(N)=O	0.922	train
Cc1ccc2nc(N3CCS(=O)(=O)c4ccccc4C3)cc(NCCN)c2c1	0.922	train
O=C1Nc2ccc(Cl)cc2C(c2ccccc2Cl)=NC1O	0.921	train
CN(C)Cc1nccn1-c1ccc(N2CCC(NS(=O)(=O)/C=C/c3ccc(Cl)s3)C2=O)c(F)c1	0.921	train
CNCCCC1c2ccccc2C=Cc2ccccc21	0.92	train
Cc1cnc(Nc2ccc(OCCN3CCCC3)cc2)nc1Nc1cccc(S(=O)(=O)NC(C)(C)C)c1	0.92	train
Cc1nc(NCCCN2CCOCC2)cc(Nc2ncc(C(=O)Nc3c(C)cccc3Cl)s2)n1	0.92	train
COc1ccc(OC)c(C(C(=O)NCCc2ccc(O)cc2)=C(C)c2ccc(O)c(OC)c2)c1	0.92	train
CNC(=O)c1ccc(Nc2nccc(-c3cnc(C)n3C(C)C)n2)cc1F	0.92	train
COc1ccc(N(Cc2cnccc2C)C2CCN([C@H](C)CCNC(=O)c3c(C)cc(Cl)nc3C)CC2)cc1	0.92	train
CCCN(CCc1cccs1)C1CCc2c(O)cccc2C1	0.92	train
CCCN(CCc1cccs1)[C@H]1CCc2c(O)cccc2C1	0.92	train
Cc1cccc(Cl)c1NC(=O)c1cnc(Nc2cccc(NCCO)n2)s1	0.92	train
Cn1cnc(S(=O)(=O)N2C[C@H]3[C@@H](C2)[C@]3(CNC(=O)c2c(Cl)cccc2Cl)CC2CC2)c1	0.92	train
COCCOc1ccc(N(Cc2cnccc2C)C2CCN([C@H](C)CCNC(=O)c3c(C)cc(C#N)nc3C)CC2)cc1	0.92	train
CCCCCCCCCC(=O)N[C@@H](Cc1c[nH]c2ccccc12)C(=O)N[C@H](CC(N)=O)C(=O)N[C@@H](CC(=O)O)C(=O)N[C@@H]1C(=O)NCC(=O)N[C@@H](CCCN)C(=O)N[C@@H](CC(=O)O)C(=O)N[C@H](C)C(=O)N[C@@H](CC(=O)O)C(=O)NCC(=O)N[C@H](CO)C(=O)N[C@@H]([C@H](C)CC(=O)O)C(=O)N[C@@H](CC(=O)c2ccccc2N)C(=O)O[C@@H]1C	0.92	train
CCCCCC(O)C=CC1C(O)CC(=O)C1CCCCCCC(=O)O	0.92	train
Oc1nc2ccccc2n1CCCN1CCC(n2c(O)nc3cc(Cl)ccc32)CC1	0.92	train
Cc1cc2cc(NC(N[C@H]3CCCCN(CC(=O)N4CCCC4)C3=O)=C(C#N)C#N)ccc2o1	0.92	train
COC(=O)Nc1nc2cc(C(=O)c3ccccc3)ccc2[nH]1	0.92	train
Cc1nn(-c2ccc(F)cc2)c(NS(=O)(=O)c2ccc(C#N)cc2)c1C(=O)N[C@@H](C)C(C)(C)C	0.92	train
COc1ccc(-c2ccc3c(N4CCOCC4)nc(N4C[C@H](C)O[C@H](C)C4)nc3n2)cc1CO	0.92	train
O=C1C(NS(=O)(=O)/C=C/c2ccc(Cl)s2)CCN1c1ccc(-n2ccnc2CN2CCCC2)cc1F	0.92	train
CC(=O)Nc1cccc(N2CCN(CCCCNS(=O)(=O)CC3CCCCC3)CC2)c1	0.92	train
CN1CCN(C(=O)C[C@H](NC(=O)/C=C/c2cc(Cl)ccc2-n2cnnn2)c2nc(-c3ccc4[nH]c(=O)cc(O)c4c3)c(Cl)[nH]2)CC1	0.92	train
N#CC1(c2ccccn2)CCN(Cc2cc3c(c4ccccc24)CN([C@H]2CCCC[C@@H]2O)C3=O)CC1	0.92	train
CCS(=O)(=O)N1CCC([C@@H](C)n2c(C)c(C(=O)NCc3c(OC)cc(C)[nH]c3=O)c3ccccc32)CC1	0.92	train
Cc1cc([C@@H](C)Nc2ccccc2C(=O)O)c2nc(N3CCOCC3)cc(=O)n2c1	0.92	train
[truncated: 1,922 more rows]

## Sheet: Table S6
General Privileged Substructure ID	General Privileged Substructure	Enhanced Substructure	Topological distance				PPB_Score	Verification with validation set and test set
			0	1	(1,3]	>3
GPSub_15	*NC3CN(*)C3	CCO*	12	5	14	101	0.161018	YES
GPSub_15	*NC3CN(*)C3	CC(ON=*)*	0	0	73	0	0.28542	YES
GPSub_15	*NC3CN(*)C3	CC1C(NC(=O)*)C(=O)N1*	45	0	0	0	0.309611	YES
GPSub_1	CCN(CC)CCO*	*C(=O)C(C)(*)N	40	117	12	7	0.155162	YES
GPSub_1	CCN(CC)CCO*	*C(=O)C(NC)*	206	454	40	28	0.173437	YES
GPSub_7	*N(CCNC(C)C)*	*C(C)O	40	30	32	136	0.162195	YES
GPSub_14	CN(C)C(=O)CNCC*	*C(C)O	151	73	108	165	0.200187	YES
GPSub_14	CN(C)C(=O)CNCC*	*CC(C)O	306	36	207	290	0.238343	YES
GPSub_14	CN(C)C(=O)CNCC*	*CCCNC(=O)*	712	154	106	484	0.11805	YES
GPSub_14	CN(C)C(=O)CNCC*	CCCCC(N*)*	283	0	85	90	0.155339	YES
GPSub_14	CN(C)C(=O)CNCC*	*C(C*)C(=O)NCC(=O)N	647	130	122	478	0.118618	YES
GPSub_14	CN(C)C(=O)CNCC*	*NC(*)C(=O)NCC(=O)N	779	144	134	612	0.100962	YES
GPSub_14	CN(C)C(=O)CNCC*	*C(=O)NC(*)C(=O)NCC(=O)N	518	204	0	423	0.112819	YES
GPSub_14	CN(C)C(=O)CNCC*	*N(C)C(=O)C(NC(=O)*)*	302	58	40	214	0.177013	YES
GPSub_14	CN(C)C(=O)CNCC*	*N(C)C(=O)C(NC(=O)C(NC)*)*	456	76	100	252	0.176663	YES
GPSub_14	CN(C)C(=O)CNCC*	*C(=*)NC(*)C(=O)NCC(=O)N	533	204	0	423	0.143679	YES
GPSub_14	CN(C)C(=O)CNCC*	*N(C)C(=O)C(NC(=O)C(*)*)*	380	14	92	162	0.186744	YES
GPSub_21	*CC(=N)*	CCCC(=O)*	15	1	43	17	0.26148	YES
GPSub_21	*CC(=N)*	*C(C)(C)C	7	0	34	19	0.218791	YES
GPSub_21	*CC(=N)*	CCCC(=*)*	62	2	52	17	0.238754	YES
GPSub_21	*CC(=N)*	CC(ON=*)*	81	0	0	0	0.179238	YES
GPSub_2	CCN(C*)CCO*	*c1ccccc1	0	130	244	186	0.258938	YES
GPSub_2	CCN(C*)CCO*	*C(=O)C(NC)*	226	482	40	28	0.134328	YES
GPSub_16	*C(=O)NC3CN(*)C3	CCO*	14	3	93	22	0.182692	YES
GPSub_16	*C(=O)NC3CN(*)C3	CC(ON=*)*	0	0	73	0	0.3009	YES
GPSub_16	*C(=O)NC3CN(*)C3	CC1C(NC(=O)*)C(=O)N1*	45	0	0	0	0.32478	YES
GPSub_12	CN(*)C(=O)CNCC*	*CC(C)C	308	329	277	781	0.107029	YES
GPSub_12	CN(*)C(=O)CNCC*	*C(C)O	121	117	126	193	0.218277	YES
GPSub_12	CN(*)C(=O)CNCC*	*c1cccnc1	0	6	11	67	0.288481	YES
GPSub_12	CN(*)C(=O)CNCC*	*C(=O)C(NC)C(C)C	187	4	50	136	0.0897708	YES
GPSub_12	CN(*)C(=O)CNCC*	*C(NC(=O)*)C(C)C	165	4	30	106	0.0946829	YES
GPSub_12	CN(*)C(=O)CNCC*	*C(=O)C(NC(=O)*)C(C)C	130	4	30	106	0.119784	YES
GPSub_12	CN(*)C(=O)CNCC*	*C(=O)C(*)C(C)C	119	39	16	126	0.0878028	YES
GPSub_12	CN(*)C(=O)CNCC*	*C(=O)C(NC)C(C)*	409	16	78	226	0.129829	YES
GPSub_12	CN(*)C(=O)CNCC*	*C(=O)C(NC(=O)*)C(C)*	261	16	46	166	0.156995	YES
GPSub_12	CN(*)C(=O)CNCC*	*N(C)C(=O)C(NC(=O)*)*	331	28	70	214	0.135825	YES
GPSub_12	CN(*)C(=O)CNCC*	*N(C)C(=O)C(NC(=O)C(*)*)*	378	44	52	202	0.13766	YES
GPSub_20	*Cn1cc(*)c(=O)cc1*	*Cc2ccc(*)cc2	38	4	3	0	0.220244	YES
GPSub_10	*NCCNCCO	CCO*	512	78	59	340	0.106968	YES
GPSub_10	*NCCNCCO	*c2ccccc2	0	286	498	1023	0.249154	YES
GPSub_10	*NCCNCCO	CCCCC*	1157	769	716	1364	0.0986212	YES
GPSub_10	*NCCNCCO	CN(C)CCN(C)*	223	0	16	62	0.122508	YES
GPSub_10	*NCCNCCO	*CCCCO*	180	21	27	211	0.148823	YES
GPSub_10	*NCCNCCO	*CCCN(C)*	869	42	115	331	0.0937934	YES
GPSub_10	*NCCNCCO	CN(*)CCN(C)*	225	0	16	62	0.128609	YES
GPSub_10	*NCCNCCO	CCCCC(N*)*	498	9	89	161	0.0830411	YES
GPSub_10	*NCCNCCO	*CCN(C*)CC(=O)N*	762	33	83	201	0.116312	YES
GPSub_10	*NCCNCCO	*CCN(*)CC(=O)N*	721	8	156	219	0.13895	YES
GPSub_10	*NCCNCCO	*CCN(C*)CC(=*)N*	797	33	83	201	0.137981	YES
GPSub_14	*NCCN4CCCC4	*CC(C)O	74	14	101	78	0.240646	YES
GPSub_14	*NCCN4CCCC4	*C(=O)NCCN1CCCC1	69	0	0	28	0.17338	YES
GPSub_14	*NCCN4CCCC4	*C(=O)C(*)C(C)C	27	9	2	16	0.229789	YES
GPSub_14	*NCCN4CCCC4	*C(=O)C(NC(=O)*)C(C)*	49	22	0	34	0.271832	YES
GPSub_14	*NCCN4CCCC4	*C(=*)C(N*)C(C)C	29	5	2	16	0.229789	YES
GPSub_14	*NCCN4CCCC4	*C5CCCN5C(=O)C(NC(=O)*)C(C)*	42	0	0	29	0.349412	YES
GPSub_14	*NCCN4CCCC4	*C5CCCN5C(=O)C(NC(=O)*)*	57	0	0	32	0.15092	YES
GPSub_3	CCN(C*)CCN*	CN1CCN(*)CC1	331	0	0	21	0.185406	YES
GPSub_3	CCN(C*)CCN*	*Nc3ccccc3	162	34	99	94	0.179056	YES
GPSub_3	CCN(C*)CCN*	CCN1CCN(*)CC1	431	0	0	37	0.156697	YES
GPSub_3	CCN(C*)CCN*	CCN(CC)CCN*	2470	30	57	199	0.0795565	YES
GPSub_3	CCN(C*)CCN*	CCN(CC)CC*	5145	105	142	592	0.0677403	YES
GPSub_3	CCN(C*)CCN*	CCN(*)CCN(C)*	1281	14	7	79	0.130239	YES
GPSub_3	CCN(C*)CCN*	*N(C*)CCN(C)*	1644	18	6	86	0.162046	YES
GPSub_22	*Nc1cccc(NC*)c1	*CCNc1cccc(*)c1	214	4	4	0	0.152393	YES
GPSub_11	*CCN(*)CC(=O)NCC*	*C(C)O	467	276	173	560	0.19599	YES
GPSub_11	*CCN(*)CC(=O)NCC*	*C(O)CCN	579	74	213	385	0.171891	YES
GPSub_6	CCN(CCN)*	CC(O)*	314	249	270	915	0.0746532	YES
GPSub_6	CCN(CCN)*	CN1CCN(*)CC1	692	0	1	33	0.133234	YES
GPSub_6	CCN(CCN)*	*c2ccccc2	0	1078	1544	3071	0.205024	YES
GPSub_6	CCN(CCN)*	*N1CCNCC1	1543	8	10	52	0.0862872	YES
GPSub_6	CCN(CCN)*	CN(C)CCN(C)*	1109	22	59	237	0.128898	YES
GPSub_6	CCN(CCN)*	*C(CC)C(=O)N	1667	156	298	988	0.0502495	YES
GPSub_6	CCN(CCN)*	CN(*)CCN(C)*	1140	22	59	237	0.146097	YES
GPSub_6	CCN(CCN)*	CCN(*)CCN(C)*	2405	80	165	633	0.133305	YES
GPSub_13	CN(C)C(=O)CNC*	*c2ccccc2	0	48	200	421	0.117996	YES
GPSub_13	CN(C)C(=O)CNC*	CCO*	62	42	97	97	0.126622	YES
GPSub_13	CN(C)C(=O)CNC*	CCC(C)C*	199	11	27	159	0.106315	YES
GPSub_13	CN(C)C(=O)CNC*	*CC(C)O	120	63	130	179	0.180038	YES
GPSub_13	CN(C)C(=O)CNC*	CCCCCN(CC*)*	638	20	54	203	0.142363	YES
GPSub_13	CN(C)C(=O)CNC*	*CCCNC(=O)*	433	173	16	321	0.142186	YES
GPSub_13	CN(C)C(=O)CNC*	*C(=O)C(NC)C(C)*	307	27	26	153	0.110265	YES
GPSub_13	CN(C)C(=O)CNC*	CCCC(NC(=O)*)*	361	127	12	277	0.125479	YES
GPSub_13	CN(C)C(=O)CNC*	*C(=O)C(NC(=O)*)C(C)*	186	27	10	111	0.137831	YES
GPSub_13	CN(C)C(=O)CNC*	*N(C)C(=O)C(NC(=O)*)*	189	32	7	143	0.237402	YES
GPSub_13	CN(C)C(=O)CNC*	*C(=O)NC(CC*)C(=O)N*	384	60	59	292	0.158262	YES
GPSub_13	CN(C)C(=O)CNC*	*C(=*)NC(C*)C(=O)NCC(=O)N	326	61	65	236	0.14173	YES
GPSub_5	CCCN1CCN(*)CC1	CCO*	43	18	16	115	0.0398428	YES
GPSub_15	*NC3CN(*)C3	*CC(C)C	36	54	2	38	0.193944	NO
GPSub_15	*NC3CN(*)C3	*C(=O)CC(C)C	14	28	0	0	0.12027	NO
GPSub_15	*NC3CN(*)C3	CON=C(C(=O)N*)c1csc(N)n1	47	0	0	0	0.150179	NO
GPSub_15	*NC3CN(*)C3	*NC(=O)C(=NO)c3csc(N)n3	49	0	0	0	0.149191	NO
GPSub_15	*NC3CN(*)C3	*S(=O)(=O)*	0	8	27	13	0.370365	NO
GPSub_15	*NC3CN(*)C3	*C(=O)CC(C)*	14	80	0	1	0.113438	NO
GPSub_15	*NC3CN(*)C3	*NC(=O)C(=N*)c2csc(N)n2	50	0	0	0	0.148837	NO
GPSub_15	*NC3CN(*)C3	CON=C(C(=O)N*)*	53	0	0	0	0.124102	NO
GPSub_18	CCN1CC(*)C1	*c3ccccc3	0	3	44	143	0.215587	NO
GPSub_18	CN1CC(*)C1	*c3ccccc3	0	23	41	131	0.147863	NO
GPSub_18	CN1CC(*)C1	*OC(C)C	10	0	0	60	0.180799	NO
GPSub_18	CN1CC(*)C1	*C(=O)C(O)*	16	0	4	34	0.219068	NO
GPSub_1	CCN(CC)CCO*	CC(C(=O)O*)(c1ccccc1)N1CCCCC1	106	10	5	0	0.11506	NO
GPSub_1	CCN(CC)CCO*	*Cc1ccccc1	103	24	322	41	0.123331	NO
GPSub_1	CCN(CC)CCO*	*C(=O)O	178	10	16	15	0.0940486	NO
GPSub_1	CCN(CC)CCO*	O=C(OC1CN2CCC1CC2)*	164	0	0	0	0.147498	NO
GPSub_1	CCN(CC)CCO*	*OC1CN2CCC1CC2	168	0	0	0	0.0791907	NO
GPSub_1	CCN(CC)CCO*	*CC(=O)O	484	35	21	6	0.166195	NO
GPSub_1	CCN(CC)CCO*	CCCOC(=O)C*	1056	0	0	5	0.108632	NO
GPSub_1	CCN(CC)CCO*	*C(=O)CC	79	134	32	31	0.229985	NO
GPSub_1	CCN(CC)CCO*	CC(C(=O)O*)(c1ccccc1)*	108	10	5	0	0.117629	NO
GPSub_1	CCN(CC)CCO*	CC(C(=O)O*)(*)N1CCCCC1	148	10	5	0	0.142563	NO
GPSub_1	CCN(CC)CCO*	CC(C)COCC(*)*	513	3	0	0	0.141353	NO
GPSub_1	CCN(CC)CCO*	*CN(Cc1ccccc1)*	78	4	180	10	0.140691	NO
GPSub_1	CCN(CC)CCO*	*=C(OC1CN2CCC1CC2)*	165	0	0	0	0.142479	NO
GPSub_1	CCN(CC)CCO*	*CCOCC*	1587	81	6	28	0.192776	NO
GPSub_1	CCN(CC)CCO*	*CC(=O)OCC*	1524	45	0	6	0.124225	NO
GPSub_1	CCN(CC)CCO*	*CC(=O)OC*	1004	1	30	3	0.130906	NO
GPSub_1	CCN(CC)CCO*	*C[N+]12CCC(CC1)C(OC(=O)*)C2	169	0	0	0	0.142563	NO
GPSub_1	CCN(CC)CCO*	*CC[N+]12CCC(CC1)C(OC(=O)*)C2	163	0	0	0	0.130657	NO
GPSub_1	CCN(CC)CCO*	CCN(CC)CCOC(=O)C(*)*	1481	0	0	0	0.141929	NO
GPSub_1	CCN(CC)CCO*	*C[N+]1(*)CCCCC1	534	84	71	3	0.120249	NO
GPSub_1	CCN(CC)CCO*	CC(*)COCC(C*)*	693	6	0	0	0.141353	NO
GPSub_1	CCN(CC)CCO*	C[N+]12CCC(CC1)C(OCC(*)(*)*)C2	164	0	0	0	0.135751	NO
GPSub_19	*C3CN(CCO)C3	*c3ccccc3	0	0	14	86	0.159832	NO
GPSub_7	*N(CCNC(C)C)*	*Cc2ccccc2	76	53	39	139	0.197816	NO
GPSub_7	*N(CCNC(C)C)*	*NC(C(C)O)*	53	26	5	79	0.107061	NO
GPSub_7	*N(CCNC(C)C)*	*C(=O)NC(C(C)O)*	32	12	14	25	0.150075	NO
GPSub_7	*N(CCNC(C)C)*	*NC(CC(C)C)C(=O)NC*	305	42	84	386	0.135266	NO
GPSub_14	CN(C)C(=O)CNCC*	CCC(C)C*	222	32	30	247	0.116422	NO
GPSub_14	CN(C)C(=O)CNCC*	*CC(C)CCC*	169	0	71	105	0.146879	NO
GPSub_14	CN(C)C(=O)CNCC*	*CCNC(=*)N	87	23	13	8	0.169282	NO
GPSub_14	CN(C)C(=O)CNCC*	*C(CCC*)C(=O)NCC(=O)N	137	2	36	54	0.146081	NO
GPSub_14	CN(C)C(=O)CNCC*	*C(CC*)C(=O)NCC(=O)N	545	44	90	385	0.123148	NO
GPSub_14	CN(C)C(=O)CNCC*	*NC(CCC*)C(=O)NCC(=O)N	155	2	46	84	0.131322	NO
GPSub_14	CN(C)C(=O)CNCC*	*NC(CC*)C(=O)NCC(=O)N	833	84	150	691	0.129592	NO
GPSub_14	CN(C)C(=O)CNCC*	*NC(C*)C(=O)NCC(=O)N	871	170	182	692	0.149548	NO
GPSub_14	CN(C)C(=O)CNCC*	*C(=O)NC(CC*)C(=O)N*	674	234	0	579	0.128718	NO
GPSub_14	CN(C)C(=O)CNCC*	*C(=*)NC(CC*)C(=O)NCC(=O)N	525	134	0	369	0.170269	NO
GPSub_14	CN(C)C(=O)CNCC*	*C(=*)NC(C*)C(=O)NCC(=O)N	583	252	0	459	0.186624	NO
GPSub_14	CN(C)C(=O)CNCC*	*C(=*)NC(CCC*)C(=O)NCC(=O)*	137	24	34	54	0.143796	NO
GPSub_21	*CC(=N)*	*S(=O)(=O)*	0	0	0	47	0.279885	NO
GPSub_21	*CC(=N)*	CC1C(NC(=O)*)C(=O)N1*	43	0	0	0	0.263023	NO
GPSub_2	CCN(C*)CCO*	CC(C(=O)O*)(c1ccccc1)N1CCCCC1	110	8	7	0	0.125749	NO
GPSub_2	CCN(C*)CCO*	*Cc1ccccc1	119	35	353	47	0.151575	NO
GPSub_2	CCN(C*)CCO*	*CCc3ccccc3	73	122	31	26	0.12886	NO
GPSub_2	CCN(C*)CCO*	O=C(OC1CN2CCC1CC2)*	170	0	0	0	0.154957	NO
GPSub_2	CCN(C*)CCO*	*OC1CN2CCC1CC2	174	0	0	0	0.0920165	NO
GPSub_2	CCN(C*)CCO*	*OCCc3ccccc3	128	11	8	1	0.127942	NO
GPSub_2	CCN(C*)CCO*	*CCOCCc3ccccc3	388	21	0	1	0.123446	NO
GPSub_2	CCN(C*)CCO*	*CC(=O)O	519	30	32	8	0.134895	NO
GPSub_2	CCN(C*)CCO*	CCN(CC)CCOC(=O)*	539	0	0	8	0.0677334	NO
GPSub_2	CCN(C*)CCO*	CCCOC(=O)C*	1083	21	0	5	0.118559	NO
GPSub_2	CCN(C*)CCO*	CCCOC(=O)*	404	8	8	19	0.061654	NO
GPSub_2	CCN(C*)CCO*	*C(=O)CC	91	141	39	34	0.181014	NO
GPSub_2	CCN(C*)CCO*	*C(=O)OC(C)C	185	5	5	7	0.0640145	NO
GPSub_2	CCN(C*)CCO*	CC(C(=O)O*)(c1ccccc1)*	114	8	7	0	0.128143	NO
GPSub_2	CCN(C*)CCO*	CC(C(=O)O*)(*)N1CCCCC1	154	8	7	0	0.150556	NO
GPSub_2	CCN(C*)CCO*	CC(C)COCC(*)*	537	3	0	0	0.14744	NO
GPSub_2	CCN(C*)CCO*	*CN(Cc1ccccc1)*	94	14	184	14	0.166624	NO
GPSub_2	CCN(C*)CCO*	*=C(OC1CN2CCC1CC2)*	171	0	0	0	0.150159	NO
GPSub_2	CCN(C*)CCO*	COC(=O)C(*)*	515	9	15	0	0.142925	NO
GPSub_2	CCN(C*)CCO*	*CCOCC*	1661	93	6	30	0.197061	NO
GPSub_2	CCN(C*)CCO*	*CC(=O)OCC*	1590	57	0	6	0.131792	NO
GPSub_2	CCN(C*)CCO*	*C(=O)C(C)(*)N	45	125	12	7	0.129824	NO
GPSub_2	CCN(C*)CCO*	*C[N+]12CCC(CC1)C(OC(=O)*)C2	175	0	0	0	0.150556	NO
GPSub_2	CCN(C*)CCO*	*CC[N+]12CCC(CC1)C(OC(=O)*)C2	163	0	0	0	0.139864	NO
GPSub_2	CCN(C*)CCO*	CCN(CC)CCOC(=O)C(*)*	1511	0	0	0	0.149487	NO
GPSub_2	CCN(C*)CCO*	CCN(CC)CCOC(=*)*	540	0	0	8	0.0645136	NO
GPSub_2	CCN(C*)CCO*	*C[N+]1(*)CCCCC1	558	84	71	3	0.1296	NO
GPSub_2	CCN(C*)CCO*	*C(=*)OC(C)C	188	5	5	7	0.0609492	NO
GPSub_2	CCN(C*)CCO*	CC(*)COCC(C*)*	711	20	0	0	0.14744	NO
GPSub_2	CCN(C*)CCO*	C[N+]12CCC(CC1)C(OCC(*)(*)*)C2	170	0	0	0	0.144107	NO
GPSub_16	*C(=O)NC3CN(*)C3	*C(C)(C)C	14	25	0	23	0.193381	NO
GPSub_16	*C(=O)NC3CN(*)C3	CON=C(C(=O)N*)c1csc(N)n1	47	0	0	0	0.167937	NO
GPSub_16	*C(=O)NC3CN(*)C3	*NC(=O)C(=NO)c3csc(N)n3	49	0	0	0	0.167574	NO
GPSub_16	*C(=O)NC3CN(*)C3	*S(=O)(=O)*	0	4	27	13	0.370259	NO
GPSub_16	*C(=O)NC3CN(*)C3	*NC(=O)C(=N*)c2csc(N)n2	50	0	0	0	0.167548	NO
GPSub_16	*C(=O)NC3CN(*)C3	CON=C(C(=O)N*)*	53	0	0	0	0.143359	NO
GPSub_12	CN(*)C(=O)CNCC*	CCCC*	1974	678	648	2234	0.0971202	NO
GPSub_12	CN(*)C(=O)CNCC*	*c1nccs1	0	50	0	3	0.110999	NO
GPSub_12	CN(*)C(=O)CNCC*	CON=C(C(=O)N*)c1csc(N)n1	47	0	0	0	0.108807	NO
GPSub_12	CN(*)C(=O)CNCC*	*CC(C)O	316	68	191	342	0.152552	NO
GPSub_12	CN(*)C(=O)CNCC*	*NC(=O)C(=NO)c3csc(N)n3	49	0	0	0	0.106121	NO
GPSub_12	CN(*)C(=O)CNCC*	*C(=O)C(O)*	68	0	43	4	0.143508	NO
GPSub_12	CN(*)C(=O)CNCC*	*NC(=O)C(=N*)c2csc(N)n2	50	0	0	0	0.104876	NO
GPSub_12	CN(*)C(=O)CNCC*	CON=C(C(=O)N*)*	53	0	0	0	0.0833836	NO
GPSub_12	CN(*)C(=O)CNCC*	*NC(=O)C(NC)C(C)*	332	76	74	380	0.285163	NO
GPSub_12	CN(*)C(=O)CNCC*	*NC(=O)C(*)C(C)C	186	42	8	250	0.234368	NO
GPSub_12	CN(*)C(=O)CNCC*	CCC(N*)C(=O)*	1057	35	306	750	0.136202	NO
GPSub_12	CN(*)C(=O)CNCC*	*C(=*)NC(C*)C(=O)NCC(=O)N	611	172	80	459	0.14653	NO
GPSub_20	*Cn1cc(*)c(=O)cc1*	O=C(O)c1cn(C*)c2c(F)cccc2c1=O	50	0	0	0	0.126303	NO
GPSub_10	*NCCNCCO	*Cc2ccccc2	109	196	355	357	0.0819214	NO
GPSub_10	*NCCNCCO	CCCCCC*	756	554	772	640	0.102691	NO
GPSub_10	*NCCNCCO	*NCCOC	418	2	15	81	0.119165	NO
GPSub_14	*NCCN4CCCC4	*C(=O)NCC(=O)N	132	16	19	104	0.1454	NO
GPSub_14	*NCCN4CCCC4	*C(=*)NC(C*)C(=O)NC*	474	32	41	292	0.128917	NO
GPSub_3	CCN(C*)CCN*	*Cc1ccccc1	324	204	439	627	0.0419906	NO
GPSub_3	CCN(C*)CCN*	COC*	414	189	257	377	0.0431278	NO
GPSub_22	*Nc1cccc(NC*)c1	C=CC(=O)*	9	2	0	8	0.116654	NO
GPSub_22	*Nc1cccc(NC*)c1	*NC(=O)c3ccccc3*	46	0	0	0	0.124148	NO
GPSub_22	*Nc1cccc(NC*)c1	*NCc2ccccc2*	48	0	0	0	0.130221	NO
GPSub_22	*Nc1cccc(NC*)c1	*CCCNc1cccc(N*)c1	88	0	0	0	0.125337	NO
GPSub_22	*Nc1cccc(NC*)c1	*CCCNc1cccc(*)c1	57	0	0	0	0.129574	NO
GPSub_11	*CCN(*)CC(=O)NCC*	*C(=O)C(C(C)C)*	321	66	58	213	0.104133	NO
GPSub_11	*CCN(*)CC(=O)NCC*	*NC(=O)C(C(C)C)*	672	16	112	382	0.150786	NO
GPSub_11	*CCN(*)CC(=O)NCC*	CC(C)C(NC(=O)*)*	345	24	80	209	0.104133	NO
GPSub_11	*CCN(*)CC(=O)NCC*	*C(=O)NC(*)C(C)O	366	72	165	212	0.162237	NO
GPSub_6	CCN(CCN)*	*Cc1ccccc1	314	506	610	1234	0.0809243	NO
GPSub_6	CCN(CCN)*	*Nc3ccccc3	563	76	190	236	0.0793371	NO
GPSub_13	CN(C)C(=O)CNC*	*C(=O)OC	18	22	20	25	0.110012	NO
GPSub_13	CN(C)C(=O)CNC*	CCCC*	1460	339	338	1281	0.113188	NO
GPSub_13	CN(C)C(=O)CNC*	COC*	95	73	48	104	0.0960174	NO
GPSub_13	CN(C)C(=O)CNC*	NCCCC*	629	50	157	395	0.0926307	NO
GPSub_13	CN(C)C(=O)CNC*	*C(=O)C(NC(=O)*)C(C)C	90	18	5	70	0.0922713	NO
GPSub_13	CN(C)C(=O)CNC*	*CCCCC(=O)N*	195	0	52	64	0.102489	NO
GPSub_13	CN(C)C(=O)CNC*	CCC(N*)C(=O)*	692	15	160	425	0.150738	NO
GPSub_13	CN(C)C(=O)CNC*	*CCCN(CCC*)*	306	41	48	242	0.125611	NO
GPSub_13	CN(C)C(=O)CNC*	*C(=O)NC(CCC*)C(=O)NC*	156	43	26	75	0.128723	NO
GPSub_13	CN(C)C(=O)CNC*	*C(=*)NC(CCC*)C(=O)NC*	171	43	26	75	0.147087	NO
GPSub_5	CCCN1CCN(*)CC1	*Oc1ccccc1	0	7	14	14	0.10381	NO
GPSub_4	*N(C)CC(C)N	*C(=O)C(NC)C(C)*	126	34	18	128	0.140198	NO
GPSub_4	*N(C)CC(C)N	*NC(=O)C(NC)C(C)*	242	13	46	198	0.151337	NO
GPSub_4	*N(C)CC(C)N	*C(=O)C(NC(=O)*)C(C)*	90	30	10	98	0.175465	NO
GPSub_4	*N(C)CC(C)N	*N(C)C(=O)C(NC(=O)*)*	187	10	24	122	0.112397	NO
GPSub_4	*N(C)CC(C)N	*N(C)C(=O)C(N*)*	390	0	56	152	0.157425	NO
GPSub_4	*N(C)CC(C)N	*C(NC(=O)C(NC)C(C)*)*	159	8	26	110	0.144383	NO
GPSub_4	*N(C)CC(C)N	*C(=O)NC(C*)C(=O)NC*	818	58	131	657	0.0818557	NO

## Sheet: Table S7
General Privileged Substructure ID	General Privileged Substructure	Reverse Enhanced Substructure	Topological distance				PPB_Score	Verification with validation set and test set
			0	1	(1,3]	>3
GPSub_18	CN1CC(*)C1	*C(=O)NC2C(=O)N3C(=CCSC23)C(=O)O	57	0	0	0	-0.159874	NO
GPSub_18	CN1CC(*)C1	*NC(=O)Cc3ccccc3	2	33	0	3	-0.16096	NO
GPSub_18	CN1CC(*)C1	*C3CN(CCO)C3	106	0	0	0	-0.447473	YES
GPSub_18	CN1CC(*)C1	CC=C*	265	7	4	12	-0.296219	NO
GPSub_18	CN1CC(*)C1	*C(=O)NC1C(=O)N2C(=C(C)CSC12)C(=O)O	55	0	0	0	-0.152232	NO
GPSub_18	CN1CC(*)C1	*CSC*	278	14	5	0	-0.388893	YES
GPSub_18	CN1CC(*)C1	*C1=C(C(=O)O)N2C(=O)C(NC(=O)C*)C2SC1	73	0	0	0	-0.162746	NO
GPSub_14	CN(C)C(=O)CNCC*	CC=CC*	298	20	64	63	-0.116666	NO
GPSub_14	CN(C)C(=O)CNCC*	*CC(=O)O	331	2	77	17	-0.238864	YES
GPSub_14	CN(C)C(=O)CNCC*	*C(=O)NC2C(=O)N3C(=CCSC23)C(=O)O	70	0	0	0	-0.155738	NO
GPSub_14	CN(C)C(=O)CNCC*	*C(=O)Cc3ccccc3	65	0	8	11	-0.181526	NO
GPSub_14	CN(C)C(=O)CNCC*	*NC(=O)Cc3ccccc3	61	0	0	5	-0.194208	NO
GPSub_14	CN(C)C(=O)CNCC*	*C(=O)NC1C(=O)N2C(=C(C)CSC12)C(=O)O	67	0	0	0	-0.150199	NO
GPSub_14	CN(C)C(=O)CNCC*	CC(NC(C*)C(=O)O)*	106	0	0	0	-0.135315	NO
GPSub_14	CN(C)C(=O)CNCC*	*CSC*	342	2	8	24	-0.24016	YES
GPSub_14	CN(C)C(=O)CNCC*	*C1=C(C(=O)O)N2C(=O)C(NC(=O)C*)C2SC1	101	0	0	0	-0.158669	NO
GPSub_14	CN(C)C(=O)CNCC*	*C(NCC(=O)O)*	172	0	4	0	-0.314505	YES
GPSub_14	CN(C)C(=O)CNCC*	*C2CCN2*	120	0	0	4	-0.199304	YES
GPSub_14	CN(C)C(=O)CNCC*	*C=C(*)N*	304	18	43	9	-0.15662	NO
GPSub_14	CN(C)C(=O)CNCC*	*C2CCN2C(=*)*	89	0	4	0	-0.11488	NO
GPSub_14	CN(C)C(=O)CNCC*	*C(=O)NC(C*)C(=O)NCC(=O)*	703	140	142	475	-0.145911	NO
GPSub_14	CN(C)C(=O)CNCC*	*C(=O)NC(*)C(=O)NCC(=O)*	647	102	122	431	-0.138259	NO
GPSub_13	CN(C)C(=O)CNC*	*C(=O)O	18	173	32	59	-0.167289	YES
GPSub_13	CN(C)C(=O)CNC*	*CC(=O)O	289	10	21	81	-0.224109	YES
GPSub_13	CN(C)C(=O)CNC*	CC=CC*	205	27	15	84	-0.185741	NO
GPSub_13	CN(C)C(=O)CNC*	CC=C*	245	12	33	85	-0.157925	NO
GPSub_13	CN(C)C(=O)CNC*	*NCCO	455	15	42	121	-0.248662	NO
GPSub_13	CN(C)C(=O)CNC*	*C(=O)NC2C(=O)N3C(=CCSC23)C(=O)O	54	0	2	0	-0.217466	NO
GPSub_13	CN(C)C(=O)CNC*	*C(=O)NC1C(=O)N2C(=C(C)CSC12)C(=O)O	52	0	2	0	-0.211928	NO
GPSub_13	CN(C)C(=O)CNC*	CC(NC(C*)C(=O)O)*	102	0	0	8	-0.121775	NO
GPSub_13	CN(C)C(=O)CNC*	*N1CC(*)C1	103	0	0	8	-0.185294	YES
GPSub_13	CN(C)C(=O)CNC*	CC(=O)NC(C*)C(=O)*	572	10	112	270	-0.20225	NO
GPSub_13	CN(C)C(=O)CNC*	*CSC*	278	11	4	42	-0.251458	YES
GPSub_13	CN(C)C(=O)CNC*	CCC(NC(*)C(=O)O)*	80	0	0	4	-0.144047	NO
GPSub_13	CN(C)C(=O)CNC*	CN(C)C(=*)C(=O)*	74	0	3	7	-0.276239	YES
GPSub_13	CN(C)C(=O)CNC*	*C1=C(C(=O)O)N2C(=O)C(NC(=O)C*)C2SC1	69	0	4	0	-0.219975	NO
GPSub_13	CN(C)C(=O)CNC*	*C(NCC(=O)O)*	151	0	0	8	-0.324098	YES
GPSub_13	CN(C)C(=O)CNC*	*C(=*)N1CC(*)C1	75	0	0	4	-0.141655	NO
GPSub_13	CN(C)C(=O)CNC*	*C=C(*)N*	248	0	35	17	-0.220694	YES
GPSub_13	CN(C)C(=O)CNC*	*NC(*)C(=O)NCC(=O)*	575	12	151	333	-0.24793	NO
GPSub_13	CN(C)C(=O)CNC*	*C(=O)NC(C*)C(=O)NCC(=O)*	407	77	71	250	-0.169271	NO
GPSub_13	CN(C)C(=O)CNC*	*C(=O)NC(*)C(=O)NCC(=O)*	381	55	63	224	-0.164156	NO
GPSub_12	CN(*)C(=O)CNCC*	CSC*	171	224	15	49	-0.208979	NO
GPSub_12	CN(*)C(=O)CNCC*	CC=CC*	298	20	64	79	-0.168471	NO
GPSub_12	CN(*)C(=O)CNCC*	CC=C*	311	11	99	116	-0.0982147	NO
GPSub_12	CN(*)C(=O)CNCC*	O=C(O)*	28	158	85	52	-0.25276	YES
GPSub_12	CN(*)C(=O)CNCC*	*CC(=O)O	258	149	118	17	-0.25014	YES
GPSub_12	CN(*)C(=O)CNCC*	*C(=O)NC2C(=O)N3C(=CCSC23)C(=O)O	70	0	0	0	-0.200491	NO
GPSub_12	CN(*)C(=O)CNCC*	CCN(CC)CC*	1476	13	184	151	-0.106025	NO
GPSub_12	CN(*)C(=O)CNCC*	CCN(CC)C*	649	19	49	72	-0.239368	YES
GPSub_12	CN(*)C(=O)CNCC*	*C=CC(=O)O	151	0	12	4	-0.239825	YES
GPSub_12	CN(*)C(=O)CNCC*	*C(=O)NC1C(=O)N2C(=C(C)CSC12)C(=O)O	67	0	0	0	-0.195317	NO
GPSub_12	CN(*)C(=O)CNCC*	CSCC(*)*	148	3	10	25	-0.248857	NO
GPSub_12	CN(*)C(=O)CNCC*	CC(NC(C*)C(=O)O)*	116	0	0	0	-0.139686	NO
GPSub_12	CN(*)C(=O)CNCC*	*C=CC(=O)*	152	0	27	15	-0.214484	YES
GPSub_12	CN(*)C(=O)CNCC*	*C1=C(C(=O)O)N2C(=O)C(NC(=O)C*)C2SC1	101	0	0	0	-0.203128	NO
GPSub_12	CN(*)C(=O)CNCC*	*C(NCC(=O)O)*	182	0	4	0	-0.308557	YES
GPSub_12	CN(*)C(=O)CNCC*	*C2CCN2*	152	0	0	4	-0.149554	NO
GPSub_12	CN(*)C(=O)CNCC*	*C=C(*)N*	304	18	43	13	-0.192693	YES
GPSub_12	CN(*)C(=O)CNCC*	*C1C(*)C(=O)N1*	156	0	0	4	-0.128631	NO
GPSub_12	CN(*)C(=O)CNCC*	*C2CCN2C(=*)*	89	0	4	0	-0.165942	YES
GPSub_12	CN(*)C(=O)CNCC*	*NC(*)C(=O)NCC(=O)*	996	2	314	628	-0.207975	NO
GPSub_12	CN(*)C(=O)CNCC*	*C(=O)NC(C*)C(=O)NCC(=O)*	731	52	230	475	-0.172844	YES
GPSub_12	CN(*)C(=O)CNCC*	*C(=O)NC(*)C(=O)NCC(=O)*	662	34	190	431	-0.161972	NO
GPSub_12	CN(*)C(=O)CNCC*	*C(=O)NC(C*)C(=O)NC*	1632	90	456	954	-0.123437	NO
GPSub_18	CCN1CC(*)C1	CC=C*	265	7	4	12	-0.2056	NO
GPSub_18	CCN1CC(*)C1	NC(C(=O)N*)c1ccccc1	0	33	0	3	-0.231074	NO
GPSub_6	CCN(CCN)*	*C(=O)O	126	172	320	379	-0.182098	YES
GPSub_6	CCN(CCN)*	*CC(=O)O	301	356	270	222	-0.165968	YES
GPSub_6	CCN(CCN)*	*CC(=O)N	3694	489	745	2771	-0.0658123	NO
GPSub_6	CCN(CCN)*	*N1CCCC1	473	8	31	132	-0.0815956	NO
GPSub_6	CCN(CCN)*	CN(C)CC(=O)*	1365	74	133	572	-0.147959	YES
GPSub_6	CCN(CCN)*	*C(=O)NC	3838	241	745	2230	-0.0650238	NO
GPSub_6	CCN(CCN)*	*C(=O)NC(C)C	1727	343	252	1258	-0.0983141	NO
GPSub_6	CCN(CCN)*	*C(=O)C(C)NC	2302	410	328	1769	-0.078318	NO
GPSub_6	CCN(CCN)*	*NC(=O)C(C)NC	3177	231	489	1938	-0.0660334	NO
GPSub_6	CCN(CCN)*	CNC(=O)C*	5660	391	1024	3455	-0.0877687	NO
GPSub_6	CCN(CCN)*	CN(C)C(=O)C*	2091	63	239	977	-0.128896	YES
GPSub_6	CCN(CCN)*	CN(C)C(=O)*	1487	49	157	588	-0.0941735	YES
GPSub_6	CCN(CCN)*	*C(C)C(=O)N	1643	214	320	1255	-0.0842471	NO
GPSub_6	CCN(CCN)*	*NC(C)C(=O)N	2162	176	376	1461	-0.0716311	NO
GPSub_6	CCN(CCN)*	*C(=O)NC(C)C(=O)N	1321	114	266	1027	-0.0973017	NO
GPSub_6	CCN(CCN)*	*CCNC(C)C	4850	626	445	2191	-0.115093	NO
GPSub_6	CCN(CCN)*	*CCCNC(C)C	1994	357	299	1173	-0.0956495	NO
GPSub_6	CCN(CCN)*	*NCCO	1713	142	297	662	-0.110119	YES
GPSub_6	CCN(CCN)*	*NCC(=O)N	2914	213	461	1649	-0.0738686	NO
GPSub_6	CCN(CCN)*	*C(=O)NCC(=O)N	1437	127	284	1121	-0.0889738	NO
GPSub_6	CCN(CCN)*	CCNC(=O)*	5073	542	851	2935	-0.0772347	NO
GPSub_6	CCN(CCN)*	*C(=O)NCCN	2661	143	303	1171	-0.0910856	YES
GPSub_6	CCN(CCN)*	*CCC(=O)*	1703	957	409	1998	-0.0703046	NO
GPSub_6	CCN(CCN)*	CN(*)CC(=O)*	1379	77	134	579	-0.133908	NO
GPSub_6	CCN(CCN)*	*C(C(=O)NC(C)C)*	1410	275	151	942	-0.128678	NO
GPSub_6	CCN(CCN)*	*C(=O)C(C)N*	2253	445	341	1809	-0.0637752	NO
GPSub_6	CCN(CCN)*	*NC(=O)C(*)NC	3366	243	477	1974	-0.0627502	NO
GPSub_6	CCN(CCN)*	*CCCCC(=O)*	847	252	91	481	-0.053762	NO
GPSub_6	CCN(CCN)*	CCN(C*)CCNC(=O)*	1517	14	58	245	-0.125257	YES
GPSub_6	CCN(CCN)*	CCN(*)CCNC(=O)*	2897	90	255	905	-0.0655187	NO
GPSub_6	CCN(CCN)*	*C(=O)NC(C)C(=O)*	1251	297	196	1206	-0.12927	NO
GPSub_6	CCN(CCN)*	CC(=O)NC(C*)C(=O)*	1564	337	187	1159	-0.166133	NO
GPSub_6	CCN(CCN)*	CC(=O)NC(*)C(=O)*	1248	292	158	1106	-0.166134	NO
GPSub_6	CCN(CCN)*	CC(=O)NC(C*)*	3626	442	641	2400	-0.153259	NO
GPSub_6	CCN(CCN)*	NC(C(=O)*)*	1591	436	279	1403	-0.0701967	NO
GPSub_6	CCN(CCN)*	*C(=O)NCC(=O)*	1424	322	216	1333	-0.115275	YES
GPSub_6	CCN(CCN)*	*C(NC)C(C)*	1595	72	286	620	-0.0943305	NO
GPSub_6	CCN(CCN)*	*C(C)C(=O)NC(C)*	1655	188	297	1028	-0.0916306	NO
GPSub_6	CCN(CCN)*	CC(C(=O)NC*)*	3857	252	734	2233	-0.10955	YES
GPSub_6	CCN(CCN)*	CCN(C*)CC(=O)*	1488	30	47	162	-0.163895	YES
GPSub_6	CCN(CCN)*	CCN(*)CC(=O)*	2520	127	167	689	-0.143806	YES
GPSub_6	CCN(CCN)*	*CCN(CC(=O)O)C*	647	32	59	20	-0.252406	NO
GPSub_6	CCN(CCN)*	*CN(CC*)C(=O)*	3664	72	107	449	-0.112698	YES
GPSub_6	CCN(CCN)*	*NC(*)C(=O)NCC(=O)*	1611	283	253	1279	-0.181489	YES
GPSub_6	CCN(CCN)*	*C(=O)NC(C*)C(=O)NCC(=O)*	1328	218	227	980	-0.185368	YES
GPSub_6	CCN(CCN)*	*C(=O)NC(*)C(=O)NCC(=O)*	1086	207	163	909	-0.173677	NO
GPSub_6	CCN(CCN)*	*C(=O)NC(C*)C(=O)NC*	3666	117	758	2302	-0.107919	YES
GPSub_1	CCN(CC)CCO*	*C(NC)C(C)*	107	6	4	36	-0.120193	YES
GPSub_2	CCN(C*)CCO*	*C(NC)C(C)*	127	18	4	36	-0.14814	YES
GPSub_3	CCN(C*)CCN*	*C(=O)O	121	169	184	189	-0.168106	YES
GPSub_3	CCN(C*)CCN*	*CC(=O)O	341	232	136	118	-0.208792	YES
GPSub_3	CCN(C*)CCN*	C=CC(=O)*	79	4	13	64	-0.187071	NO
GPSub_3	CCN(C*)CCN*	*CC(=O)N	2232	134	320	935	-0.142154	NO
GPSub_3	CCN(C*)CCN*	*N1CCCC1	323	16	24	91	-0.0848799	NO
GPSub_3	CCN(C*)CCN*	CC(=O)*	1178	420	251	766	-0.132906	NO
GPSub_3	CCN(C*)CCN*	*C(=O)NC	2188	166	219	750	-0.197998	YES
GPSub_3	CCN(C*)CCN*	*NC(C)C	2213	167	195	638	-0.144785	YES
GPSub_3	CCN(C*)CCN*	*C(=O)NC(C)C	1040	144	79	388	-0.169309	YES
GPSub_3	CCN(C*)CCN*	*C(C)NC	3171	242	317	838	-0.134133	YES
GPSub_3	CCN(C*)CCN*	*C(=O)C(C)NC	1430	133	118	465	-0.130352	NO
GPSub_3	CCN(C*)CCN*	*NC(=O)C(C)NC	1729	37	141	454	-0.148443	YES
GPSub_3	CCN(C*)CCN*	CN(C)CC(=O)*	786	12	41	85	-0.183923	YES
GPSub_3	CCN(C*)CCN*	CNC(=O)C*	3488	113	308	1007	-0.175206	YES
GPSub_3	CCN(C*)CCN*	CN(C)C(=O)C*	1284	14	45	207	-0.164714	YES
GPSub_3	CCN(C*)CCN*	CN(C)C(=O)*	850	25	28	145	-0.141635	YES
GPSub_3	CCN(C*)CCN*	*C(C)C(=O)N	976	64	132	414	-0.151861	NO
GPSub_3	CCN(C*)CCN*	*C(=O)NC(C)C(=O)N	696	34	94	321	-0.141287	NO
GPSub_3	CCN(C*)CCN*	*CNC(C)C	2808	175	152	538	-0.148353	YES
GPSub_3	CCN(C*)CCN*	*CCNC(C)C	3180	162	229	659	-0.177666	YES
GPSub_3	CCN(C*)CCN*	*CCCNC(C)C	1337	112	140	351	-0.0944588	NO
GPSub_3	CCN(C*)CCN*	*NCCO	1304	103	119	332	-0.168662	NO
GPSub_3	CCN(C*)CCN*	*NCC(=O)N	1579	39	136	441	-0.154657	YES
GPSub_3	CCN(C*)CCN*	*C(=O)NCC(=O)N	763	40	92	350	-0.129141	YES
GPSub_3	CCN(C*)CCN*	CCNC(=O)*	2998	321	252	1060	-0.206061	YES
GPSub_3	CCN(C*)CCN*	CC=C*	282	36	117	188	-0.162491	NO
GPSub_3	CCN(C*)CCN*	*C(=O)NCCN	1522	40	98	387	-0.156055	YES
GPSub_3	CCN(C*)CCN*	*CCC(=O)*	1195	368	252	703	-0.13271	NO
GPSub_3	CCN(C*)CCN*	*C(C(=O)NC(C)C)*	958	72	44	268	-0.146801	NO
GPSub_3	CCN(C*)CCN*	*C(=O)C(*)NC	1560	165	156	510	-0.125777	NO				*CCNCC(=O)N(C)C
GPSub_3	CCN(C*)CCN*	*NC(=O)C(*)NC	1911	40	135	480	-0.143764	YES
GPSub_3	CCN(C*)CCN*	*C(=O)C(NC(=O)C(C)NC)*	633	66	60	238	-0.148346	NO
GPSub_3	CCN(C*)CCN*	CCN(C*)CCNC(=O)*	1257	16	43	182	-0.163359	YES
GPSub_3	CCN(C*)CCN*	CCN(*)CCNC(=O)*	1667	20	67	224	-0.141044	YES
GPSub_3	CCN(C*)CCN*	*C(=O)NC(C)C(=O)*	760	105	62	372	-0.177941	YES
GPSub_3	CCN(C*)CCN*	CC(=O)NC(C*)C(=O)*	944	95	70	333	-0.23219	YES
GPSub_3	CCN(C*)CCN*	CC(=O)NC(C*)*	2519	161	231	791	-0.209117	YES
GPSub_3	CCN(C*)CCN*	*CSC*	476	40	25	58	-0.290425	YES
GPSub_3	CCN(C*)CCN*	*C(=O)NCC(=O)*	876	128	61	417	-0.167477	YES
GPSub_3	CCN(C*)CCN*	CC(C(=O)NCC*)*	2676	152	217	808	-0.197049	YES
GPSub_3	CCN(C*)CCN*	CC(C(=O)NC*)*	2597	99	245	776	-0.164321	YES
GPSub_3	CCN(C*)CCN*	CCN(C*)CC(=O)*	1102	16	35	85	-0.188989	YES
GPSub_3	CCN(C*)CCN*	CCN(*)CC(=O)*	1526	40	63	153	-0.186077	YES
GPSub_3	CCN(C*)CCN*	*C(=*)NCCN	1681	44	104	399	-0.149273	YES
GPSub_3	CCN(C*)CCN*	*C(NCC(=O)O)*	236	4	3	10	-0.328954	YES
GPSub_3	CCN(C*)CCN*	*C2CCN2*	141	0	2	13	-0.266243	YES
GPSub_3	CCN(C*)CCN*	*C(*)C(=O)NCC(=O)N	688	22	87	216	-0.16699	NO
GPSub_3	CCN(C*)CCN*	*CCN(CC(=O)O)C*	594	24	20	10	-0.279551	YES
GPSub_3	CCN(C*)CCN*	*C(=O)C(NC(=O)C(C)*)*	662	73	43	264	-0.158538	NO
GPSub_3	CCN(C*)CCN*	*C(=O)C(NC(=O)C(*)NC)*	712	69	53	253	-0.141489	NO
GPSub_3	CCN(C*)CCN*	*CN(CC*)C(=O)*	2715	39	51	320	-0.145228	YES
GPSub_3	CCN(C*)CCN*	*NC(*)C(=O)NCC(=O)*	812	71	61	269	-0.259823	YES
GPSub_3	CCN(C*)CCN*	*NC(*)C(=O)NC*	2952	75	215	852	-0.164795	YES
GPSub_3	CCN(C*)CCN*	*C(=O)NC(C*)C(=O)NCC(=O)*	660	64	63	260	-0.241845	YES
GPSub_3	CCN(C*)CCN*	*C(=O)NC(*)C(=O)NCC(=O)*	567	61	45	241	-0.238563	NO
GPSub_3	CCN(C*)CCN*	*C(=O)NC(C*)C(=O)NC*	2222	87	225	904	-0.154312	YES
GPSub_10	*NCCNCCO	CC=CC*	466	83	66	48	-0.161908	NO
GPSub_10	*NCCNCCO	CC=C*	496	68	88	46	-0.138005	NO
GPSub_10	*NCCNCCO	*C(=O)O	335	11	168	119	-0.214621	YES
GPSub_10	*NCCNCCO	CN(C)CC(=O)*	473	39	22	124	-0.183858	NO
GPSub_10	*NCCNCCO	*NC(=O)C(C)NC	1098	90	213	386	-0.220574	NO
GPSub_10	*NCCNCCO	*CC(=O)O	529	216	37	111	-0.231523	YES
GPSub_10	*NCCNCCO	*C(=O)NC(C)C(=O)N	559	69	126	249	-0.153669	NO
GPSub_10	*NCCNCCO	*C(=O)NC2C(=O)N3C(=CCSC23)C(=O)O	120	0	0	2	-0.245087	NO
GPSub_10	*NCCNCCO	*C(=O)Cc3ccccc3	29	79	10	21	-0.134446	NO
GPSub_10	*NCCNCCO	*C(=O)NC1C(=O)N2C(=C(C)CSC12)C(=O)O	116	0	0	2	-0.239853	NO
GPSub_10	*NCCNCCO	*C(=O)NCCN	915	55	154	321	-0.148757	NO
GPSub_10	*NCCNCCO	*C(=O)N(C)*	466	26	19	140	-0.233877	NO
GPSub_10	*NCCNCCO	*CC(=O)N(C)*	770	4	77	169	-0.247303	NO
GPSub_10	*NCCNCCO	CN(*)CC(=O)*	492	26	35	124	-0.175475	NO
GPSub_10	*NCCNCCO	CC(NC(C*)C(=O)O)*	198	0	4	0	-0.125614	NO
GPSub_10	*NCCNCCO	*C(=O)NC(C)C(=O)*	588	180	39	343	-0.246182	YES
GPSub_10	*NCCNCCO	CC(=O)NC(C*)C(=O)*	840	191	80	336	-0.258844	YES
GPSub_10	*NCCNCCO	CC(=O)NC(*)C(=O)*	642	135	64	303	-0.273815	YES
GPSub_10	*NCCNCCO	CC(=O)NC(C*)*	1929	217	371	726	-0.262035	NO
GPSub_10	*NCCNCCO	*CSC*	288	314	18	8	-0.246914	YES
GPSub_10	*NCCNCCO	*C(=O)NCC(=O)*	739	189	57	387	-0.231426	YES
GPSub_10	*NCCNCCO	*C1=C(C(=O)O)N2C(=O)C(NC(=O)C*)C2SC1	162	0	0	2	-0.247511	NO
GPSub_10	*NCCNCCO	*C(NCC(=O)O)*	298	0	4	2	-0.299646	YES
GPSub_10	*NCCNCCO	*C2CCN2*	191	0	0	2	-0.299092	YES
GPSub_10	*NCCNCCO	*CCN(CC(=O)O)C*	605	14	14	14	-0.253968	YES
GPSub_10	*NCCNCCO	*C1C(NC(=O)*)C(=O)N1*	187	0	0	2	-0.280537	YES
GPSub_10	*NCCNCCO	*C2CCN2C(=*)*	130	0	0	2	-0.276033	NO
GPSub_10	*NCCNCCO	*CCN(C*)CC(=O)*	1223	81	48	252	-0.212929	NO
GPSub_9	*NCCN4CCCC4	*CCNC(C)C	404	52	17	187	-0.243753	NO
GPSub_9	*NCCN4CCCC4	*CCCCNC(C)C	143	27	13	27	-0.138617	NO
GPSub_9	*NCCN4CCCC4	*C(=O)N1CCCC1C(=O)O	19	0	0	0	-0.238693	NO
GPSub_9	*NCCN4CCCC4	CC(NC(C*)C(=O)O)C(=O)N1CCCC1C(=O)O	18	0	0	0	-0.235656	NO
GPSub_9	*NCCN4CCCC4	*CC(=O)O	39	36	9	7	-0.287633	YES
GPSub_9	*NCCN4CCCC4	CCCC(N*)C(=O)O	45	0	2	0	-0.211548	NO
GPSub_9	*NCCN4CCCC4	*C(=O)C4CCCN4C(=O)*	52	0	0	14	-0.194528	NO
GPSub_9	*NCCN4CCCC4	*CCCCC(=O)*	93	25	19	61	-0.136386	NO
GPSub_9	*NCCN4CCCC4	CC(NC(CC*)C(=O)O)C(=O)*	18	0	0	0	-0.235656	NO
GPSub_9	*NCCN4CCCC4	CC(NC(CC*)C(=O)O)*	19	0	0	0	-0.238693	NO
GPSub_9	*NCCN4CCCC4	*NC(*)C(=O)O	62	0	2	2	-0.203688	NO
GPSub_9	*NCCN4CCCC4	CC(=O)NC(C*)C(=O)*	132	37	14	95	-0.262337	NO
GPSub_9	*NCCN4CCCC4	CCCC(NC(=O)*)C(=O)*	92	35	6	31	-0.172141	NO
GPSub_9	*NCCN4CCCC4	*NC(C)C(=O)N1CCCC1C(=O)*	51	0	0	14	-0.183308	NO
GPSub_9	*NCCN4CCCC4	CCC(NC(*)C(=O)O)*	26	0	0	0	-0.20911	NO
GPSub_9	*NCCN4CCCC4	CCCC(N*)C(=*)O	45	0	2	6	-0.191362	NO
GPSub_9	*NCCN4CCCC4	CC(NC(CC*)*)C(=O)*	51	0	0	0	-0.171604	NO
GPSub_9	*NCCN4CCCC4	CC(NC(CC*)C(=O)*)*	38	0	0	0	-0.192292	NO
GPSub_9	*NCCN4CCCC4	*NC(*)C(=*)O	62	0	2	4	-0.18545	NO
GPSub_9	*NCCN4CCCC4	CCCC(NC(=*)*)C(=O)*	93	45	6	31	-0.137495	NO
GPSub_9	*NCCN4CCCC4	*NC(*)C(=O)NCC(=O)*	140	24	17	76	-0.225266	NO
GPSub_9	*NCCN4CCCC4	*CCCCC(N*)C(=O)*	34	2	1	5	-0.149855	NO
GPSub_15	*NC3CN(*)C3	CSC*	292	0	7	11	-0.306387	NO
GPSub_15	*NC3CN(*)C3	C=CC(=O)*	0	57	3	4	-0.267474	NO
GPSub_15	*NC3CN(*)C3	*C(=O)NC2C(=O)N3C(=CCSC23)C(=O)O	54	0	0	0	-0.257543	NO
GPSub_15	*NC3CN(*)C3	*Cc3ccccc3	0	5	63	11	-0.183296	NO
GPSub_15	*NC3CN(*)C3	*NC(=O)Cc3ccccc3	34	0	0	3	-0.243504	NO
GPSub_15	*NC3CN(*)C3	CC=C*	0	223	13	6	-0.279218	NO
GPSub_15	*NC3CN(*)C3	*C(=O)NC1C(=O)N2C(=C(C)CSC12)C(=O)O	52	0	0	0	-0.246471	NO
GPSub_15	*NC3CN(*)C3	CSCC(*)*	112	0	0	3	-0.344075	NO
GPSub_15	*NC3CN(*)C3	*C1=C(C(=O)O)N2C(=O)C(NC(=O)C*)C2SC1	69	0	0	0	-0.25893	NO
GPSub_22	*Nc1cccc(NC*)c1	*C3CC3	0	3	0	18	-0.0625128	NO
GPSub_22	*Nc1cccc(NC*)c1	*Nc2cc(NC3CC3)n3ncc(C#N)c3n2	18	0	0	0	-0.0560257	NO
GPSub_22	*Nc1cccc(NC*)c1	*Nc2cc(N*)n3ncc(C#N)c3n2	25	0	0	0	-0.0638276	NO
GPSub_7	*N(CCNC(C)C)*	*NCC(=O)N	425	68	73	384	-0.186856	NO
GPSub_7	*N(CCNC(C)C)*	*CC(=O)N(C)*	293	0	102	230	-0.140987	NO
GPSub_7	*N(CCNC(C)C)*	*CCCC(=O)*	231	76	46	299	-0.142376	NO
GPSub_7	*N(CCNC(C)C)*	CC(NC(CC*)C(=O)O)C(=O)*	26	0	0	0	-0.194443	NO
GPSub_7	*N(CCNC(C)C)*	CC(NC(C*)C(=O)O)*	32	0	0	0	-0.217248	NO
GPSub_7	*N(CCNC(C)C)*	*C(CC*)C(=O)O	35	33	0	4	-0.166475	NO
GPSub_7	*N(CCNC(C)C)*	*C(C*)C(=O)O	41	25	0	4	-0.18917	NO
GPSub_7	*N(CCNC(C)C)*	*NC(CC*)C(=O)O	80	0	0	0	-0.179685	NO
GPSub_7	*N(CCNC(C)C)*	*NC(C*)C(=O)O	94	0	0	0	-0.202455	NO
GPSub_7	*N(CCNC(C)C)*	*NC(*)C(=O)O	82	2	0	2	-0.203768	NO
GPSub_7	*N(CCNC(C)C)*	*CCCCC(=O)*	107	52	14	49	-0.226131	NO
GPSub_7	*N(CCNC(C)C)*	*CCCCCC(=O)*	56	21	4	6	-0.176195	NO
GPSub_7	*N(CCNC(C)C)*	*N1CCCC1C(=O)*	41	3	0	6	-0.203508	NO
GPSub_7	*N(CCNC(C)C)*	*N1CCCC1*	54	0	3	6	-0.223206	NO
GPSub_7	*N(CCNC(C)C)*	CC(=O)NC(C*)C(=O)*	244	67	45	231	-0.136035	NO
GPSub_7	*N(CCNC(C)C)*	CC(=O)NC(*)C(=O)*	203	52	41	231	-0.1297	NO
GPSub_7	*N(CCNC(C)C)*	CCCC(NC(=O)*)C(=O)*	194	24	49	209	-0.207019	NO
GPSub_7	*N(CCNC(C)C)*	CCCC(NC(=O)*)*	249	4	79	219	-0.195052	NO
GPSub_7	*N(CCNC(C)C)*	CCCC(N*)C(=O)*	346	95	0	491	-0.167154	NO
GPSub_7	*N(CCNC(C)C)*	*NC(C)C(=O)N1CCCC1C(=O)*	39	8	0	0	-0.217018	NO
GPSub_7	*N(CCNC(C)C)*	*NCC(=O)N3CCCC3*	52	6	2	0	-0.236896	NO
GPSub_7	*N(CCNC(C)C)*	CC(NC(C*)*)C(=O)*	119	0	0	0	-0.157109	NO
GPSub_7	*N(CCNC(C)C)*	CC(NC(CC*)C(=O)*)*	42	0	0	0	-0.142425	NO
GPSub_7	*N(CCNC(C)C)*	*CCC(NC(=O)*)C(=O)*	223	32	49	224	-0.190907	NO
GPSub_7	*N(CCNC(C)C)*	CCC(NC(*)C(=O)*)C(=O)*	39	0	0	0	-0.142425	NO
GPSub_7	*N(CCNC(C)C)*	CCC(NC(*)*)C(=O)*	47	0	0	0	-0.157109	NO
GPSub_7	*N(CCNC(C)C)*	CCC(NC(*)C(=O)*)*	64	0	0	0	-0.157109	NO
GPSub_7	*N(CCNC(C)C)*	*NC(*)C(=O)NCC(=O)*	309	131	0	334	-0.0983043	NO
GPSub_7	*N(CCNC(C)C)*	*CCCCC(N*)C(=O)*	92	5	0	3	-0.132212	NO
GPSub_4	*N(C)CC(C)N	*CC(=O)O	38	82	44	27	-0.102091	YES
GPSub_4	*N(C)CC(C)N	CC(C)N(C)C*	455	46	9	159	-0.142436	NO
GPSub_4	*N(C)CC(C)N	*CCNC(C)C	964	185	68	522	-0.187857	NO
GPSub_4	*N(C)CC(C)N	*CCCNC(C)C	445	102	41	279	-0.0892274	NO
GPSub_4	*N(C)CC(C)N	*CCCCNC(C)C	312	95	31	200	-0.128795	NO
GPSub_4	*N(C)CC(C)N	*NCC(=O)O	92	11	9	10	-0.14787	NO
GPSub_4	*N(C)CC(C)N	*C(=O)C4CCCN4*	60	2	0	14	-0.155619	NO
GPSub_4	*N(C)CC(C)N	*C(C(=O)NC(C)C)*	311	80	25	234	-0.0872253	NO
GPSub_4	*N(C)CC(C)N	CCCCCN(CC*)*	569	24	60	157	-0.0260183	NO
GPSub_4	*N(C)CC(C)N	CCCCCN(C*)*	515	24	47	139	-0.0531259	NO
GPSub_4	*N(C)CC(C)N	CCCCCN(*)*	238	7	34	74	-0.088233	NO
GPSub_4	*N(C)CC(C)N	*CCCCC(=O)*	175	54	14	105	-0.151388	NO
GPSub_4	*N(C)CC(C)N	*CCNC(C)*	1187	128	194	605	-0.172815	NO
GPSub_4	*N(C)CC(C)N	*CCCCNC(C)*	347	97	67	219	-0.126886	NO
GPSub_4	*N(C)CC(C)N	CC(=O)NC(*)C(=O)*	253	91	29	274	-0.0675163	NO
GPSub_4	*N(C)CC(C)N	NC(C(=O)N1CCCC1C(=O)*)*	60	2	0	15	-0.163423	NO
GPSub_4	*N(C)CC(C)N	CCCC(N*)C(=O)*	356	110	73	390	-0.0623092	NO
GPSub_4	*N(C)CC(C)N	*C(C)C(=O)N1CCCC1C(=O)*	60	2	0	15	-0.163423	NO
GPSub_4	*N(C)CC(C)N	*NC(C)C(=O)N1CCCC1C(=O)*	57	2	0	14	-0.162811	NO
GPSub_4	*N(C)CC(C)N	*C(=O)C(NC(=O)C(C)*)*	251	81	31	237	-0.0644544	NO
GPSub_4	*N(C)CC(C)N	*CCN(CC*)C(=O)*	277	5	6	42	-0.108306	NO
GPSub_4	*N(C)CC(C)N	*CCCC(=O)NC(C*)*	613	188	146	476	-0.106505	NO
GPSub_4	*N(C)CC(C)N	*CCCCC(=O)NC(C*)*	250	58	38	137	-0.105354	NO
GPSub_4	*N(C)CC(C)N	*CCCCC(=O)NC(*)*	152	25	27	70	-0.109661	NO
GPSub_20	*Cn1cc(*)c(=O)cc1*	*c3ccc(F)cc3	31	0	0	5	-0.342327	NO
GPSub_20	*Cn1cc(*)c(=O)cc1*	CN(C)*	0	3	31	16	-0.364801	NO
GPSub_20	*Cn1cc(*)c(=O)cc1*	CCC*	70	2	48	391	-0.30802	NO
GPSub_20	*Cn1cc(*)c(=O)cc1*	Nc1cccc(*)c1	40	0	0	8	-0.356767	NO
GPSub_20	*Cn1cc(*)c(=O)cc1*	*NCC*	6	0	210	111	-0.38472	NO
GPSub_20	*Cn1cc(*)c(=O)cc1*	*CCn1cc(C(=O)*)c(=O)cc1*	65	0	0	0	-0.273445	NO
GPSub_11	*CCN(*)CC(=O)NCC*	*CCN(C*)CC(=O)NCC*	3094	24	692	448	-0.166406	NO
GPSub_21	*CC(=N)*	CSC*	0	0	86	11	-0.228284	NO
GPSub_21	*CC(=N)*	*C(=O)O	0	0	37	51	-0.108328	NO
GPSub_21	*CC(=N)*	*CC(=O)O	0	1	77	37	-0.106744	NO
GPSub_21	*CC(=N)*	*C(=O)NC2C(=O)N3C(=CCSC23)C(=O)O	28	0	0	0	-0.384629	NO
GPSub_21	*CC(=N)*	*C(=O)N	60	7	62	45	-0.168751	NO
GPSub_21	*CC(=N)*	*C(=O)NC1C(=O)N2C(=C(C)CSC12)C(=O)O	27	0	0	0	-0.390523	NO
GPSub_21	*CC(=N)*	CSCC(*)*	0	0	30	1	-0.324288	NO
GPSub_21	*CC(=N)*	*CCN(C)C*	13	2	146	71	-0.237403	NO
GPSub_21	*CC(=N)*	*C=CC(=O)*	2	22	1	59	-0.212203	NO
GPSub_21	*CC(=N)*	*C=CC(=*)*	35	22	1	67	-0.16518	NO
GPSub_16	*C(=O)NC3CN(*)C3	CSC*	287	7	0	11	-0.293257	NO
GPSub_16	*C(=O)NC3CN(*)C3	*C(=O)NC2C(=O)N3C(=CCSC23)C(=O)O	54	0	0	0	-0.246305	NO
GPSub_16	*C(=O)NC3CN(*)C3	*Cc3ccccc3	5	59	2	11	-0.172119	NO
GPSub_16	*C(=O)NC3CN(*)C3	*NC(=O)Cc3ccccc3	32	0	0	3	-0.233374	NO
GPSub_16	*C(=O)NC3CN(*)C3	CC=C*	0	224	16	2	-0.268267	NO
GPSub_16	*C(=O)NC3CN(*)C3	*C(=O)NC1C(=O)N2C(=C(C)CSC12)C(=O)O	52	0	0	0	-0.235155	NO
GPSub_16	*C(=O)NC3CN(*)C3	CSCC(*)*	110	0	0	3	-0.33419	NO
GPSub_16	*C(=O)NC3CN(*)C3	*C1=C(C(=O)O)N2C(=O)C(NC(=O)C*)C2SC1	69	0	0	0	-0.247796	NO
